# Supplementary material for: Interactive effects between soil properties and bacterial communities in tomato rhizosphere under the application of microbial agents
Source: PeerJ. 2025 Jun 30;13:e19564. doi: 10.7717/peerj.19564 (PMC12225625; doi:10.7717/peerj.19564)
Supplement: Supplemental Information 2 [file peerj-13-19564-s002.xlsx]

## Sheet: tomato6.27
	SPECIMEN_NAME	SA	APA	CA	TN	AP	AK	OM
	FQ_CK	6.16945	1.20535	5.33808	0.7572	12.6825	100.369	12.6459
	FQ_T1	6.55574	1.39922	5.4021	0.8988	13.4495	167.131	14.5129
	FQ_T2	6.98317	1.57073	5.71235	0.8475	18.3132	153.05	14.3517
	FQ_T3	6.23506	1.32608	5.51694	0.9993	17.7782	152.155	15.0648
	FQ_T4	6.55452	1.34301	5.55786	0.9327	15.2866	157.548	14.4171
	FQ_T5	6.86093	1.34109	5.67303	0.9719	18.1241	125.678	13.6242
