# Supplementary material for: Interactive effects between soil properties and bacterial communities in tomato rhizosphere under the application of microbial agents
Source: PeerJ. 2025 Jun 30;13:e19564. doi: 10.7717/peerj.19564 (PMC12225625; doi:10.7717/peerj.19564)
Supplement: Supplemental Information 4 [file peerj-13-19564-s004.xls]

## Sheet: TOMATO-0329taxa.percen
#OTU ID	FQ_CK	FQ_T1	FQ_T2	FQ_T3	FQ_T4	FQ_T5			FQ_CK	FQ_T1	FQ_T2	FQ_T3	FQ_T4	FQ_T5
Proteobacteria	8788	7504	7913	8216	7954	8562	1	Proteobacteria	0.28031	0.239354	0.2524	0.262065	0.253708	0.273101
Firmicutes	5231	5772	6267	5764	6562	5272	2	Firmicutes	0.166853	0.184109	0.199898	0.183854	0.209308	0.168161
Chloroflexi	4837	4138	3414	3094	2660	3535	3	Chloroflexi	0.154285	0.131989	0.108896	0.098689	0.0848458	0.112756
Actinobacteriota	3033	3832	3870	3060	3325	3499	4	Actinobacteriota	0.0967433	0.122229	0.123441	0.0976045	0.106057	0.111607
Acidobacteriota	2636	3445	3122	3746	4113	3357	5	Acidobacteriota	0.0840803	0.109885	0.0995821	0.119486	0.131192	0.107078
Bacteroidota	1990	1601	1638	1261	1486	1156	6	Bacteroidota	0.0634748	0.051067	0.0522471	0.040222	0.0473988	0.0368728
Myxococcota	913	743	879	1117	1094	1060	7	Myxococcota	0.0291219	0.0236994	0.0280374	0.0356288	0.0348952	0.0338107
Gemmatimonadota	890	699	891	970	1023	1124	8	Gemmatimonadota	0.0283882	0.0222959	0.0284201	0.03094	0.0326305	0.0358521
Nitrospirota	501	509	524	573	360	615	9	Nitrospirota	0.0159804	0.0162355	0.016714	0.0182769	0.0114829	0.0196166
Verrucomicrobiota	401	694	247	556	143	392	10	Verrucomicrobiota	0.0127907	0.0221365	0.00787854	0.0177347	0.00456126	0.0125036
others	2131	2414	2586	2994	2631	2779	11	Entotheonellaeota	0.00851648	0.00787854	0.0107812	0.0160122	0.0125036	0.0124398
	31351	31351	31351	31351	31351	31351
	29220	28937	28765	28357	28720	28572		1+2	0.447163	0.423463	0.452298	0.445919	0.463016	0.441262	0.44552
Proteobacteria	0.28031	0.239354	0.2524	0.262065	0.253708	0.273101
Firmicutes	0.166853	0.184109	0.199898	0.183854	0.209308	0.168161		Proteobacteria		-0.0409556	-0.0279098	-0.018245	-0.026602	-0.0072087	-0.0241842
Chloroflexi	0.154285	0.131989	0.108896	0.098689	0.0848458	0.112756		Firmicutes		0.0172562	0.0330452	0.0170011	0.0424548	0.00130777	0.022213
Actinobacteriota	0.0967433	0.122229	0.123441	0.0976045	0.106057	0.111607		Chloroflexi		-0.0222959	-0.0453893	-0.0555963	-0.0694396	-0.0415298	-0.0468502
Acidobacteriota	0.0840803	0.109885	0.0995821	0.119486	0.131192	0.107078		Actinobacteriota		0.0254856	0.0266977	0.000861217	0.0093139	0.014864	0.0154445
Bacteroidota	0.0634748	0.051067	0.0522471	0.040222	0.0473988	0.0368728		Acidobacteriota		0.0258046	0.0155019	0.0354056	0.0471117	0.0229977	0.0293643
Myxococcota	0.0291219	0.0236994	0.0280374	0.0356288	0.0348952	0.0338107		Bacteroidota		-0.0124079	-0.0112277	-0.0232528	-0.016076	-0.026602	-0.0179133
Gemmatimonadota	0.0283882	0.0222959	0.0284201	0.03094	0.0326305	0.0358521		Myxococcota		-0.00542248	-0.00108449	0.00650697	0.00577334	0.00468885	0.00209244
Nitrospirota	0.0159804	0.0162355	0.016714	0.0182769	0.0114829	0.0196166		Gemmatimonadota		-0.00609231	3.18969e-05	0.00255175	0.00424229	0.00746388	0.0016395
Verrucomicrobiota	0.0127907	0.0221365	0.00787854	0.0177347	0.00456126	0.0125036		Nitrospirota		0.000255175	0.000733629	0.00229658	-0.00449746	0.00363625	0.000484833
Entotheonellaeota	0.00851648	0.00787854	0.0107812	0.0160122	0.0125036	0.0124398		Verrucomicrobiota		0.00934579	-0.00491212	0.00494402	-0.0082294	-0.000287072	0.000172243
								Entotheonellaeota		-0.000637938	0.00226468	0.00749577	0.00398711	0.00392332	0.00340659
								Proteobacteria	%CK	-0.146108	-0.0995676	-0.0650888	-0.0949021	-0.0257169
Entotheonellaeota	267	247	338	502	392	390	11	Firmicutes	%CK	0.103422	0.19805	0.101893	0.254445	0.00783789
Planctomycetota	285	380	198	314	108	412	12	Chloroflexi	%CK	-0.144511	-0.294191	-0.360347	-0.450072	-0.269175
unclassified_k__norank_d__Bacteria	215	206	269	299	260	349	13	Actinobacteriota	%CK	0.263436	0.275964	0.00890208	0.0962743	0.153643
Methylomirabilota	121	156	189	228	332	252	14	Acidobacteriota	%CK	0.306904	0.18437	0.421093	0.560319	0.27352
dCyanobacteria	85	308	294	144	123	185	15	Bacteroidota	%CK	-0.195477	-0.176884	-0.366332	-0.253266	-0.419095
NB1-j	94	120	105	245	271	192	16	Myxococcota	%CK	-0.186199	-0.0372399	0.223439	0.198248	0.161008
Patescibacteria	246	211	231	94	69	166	17	Gemmatimonadota	%CK	-0.214607	0.0011236	0.0898876	0.149438	0.262921
Desulfobacterota	70	113	105	241	216	161	18	Nitrospirota	%CK	0.0159681	0.0459082	0.143713	-0.281437	0.227545
Bdellovibrionota	291	133	162	118	71	97	19	Verrucomicrobiota	%CK	0.730673	-0.38404	0.386534	-0.643392	-0.0224439
RCP2-54	92	90	102	151	148	118	20	Entotheonellaeota	%CK	-0.0749064	0.265918	0.88015	0.468165	0.460674
Latescibacterota	40	59	62	168	164	142	21
MBNT15	75	66	73	208	92	82	22
Dependentiae	40	108	75	99	184	74	23
Fibrobacterota	33	12	131	19	18	11	24
Deinococcota	42	42	47	12	13	44	25
Sumerlaeota	48	38	28	21	3	15	26
Dadabacteria	17	10	24	31	52	15	27
Elusimicrobiota	8	33	25	19	28	24	28
Halanaerobiaeota	18	6	82	18	6	2	29
Armatimonadota	11	24	14	21	11	21	30
Hydrogenedentes	8	15	9	12	2	11	31
WS2	14	18	10	5	4	6	32
Zixibacteria	0	2	3	8	27	5	33
GAL15	0	2	2	2	31	1	34
_SAR324_cladeMarine_group_B	7	11	7	2	4	4	35
FCPU426	0	0	0	9	0	0	36
Spirochaetota	1	2	1	2	0	0	37
WPS-2	3	0	0	0	2	0	38
Deferrisomatota	0	0	0	2	0	0	39
Fusobacteriota	0	2	0	0	0	0	40
