# Supplementary material for: Interactive effects between soil properties and bacterial communities in tomato rhizosphere under the application of microbial agents
Source: PeerJ. 2025 Jun 30;13:e19564. doi: 10.7717/peerj.19564 (PMC12225625; doi:10.7717/peerj.19564)
Supplement: Supplemental Information 5 [file peerj-13-19564-s005.xlsx]

## Sheet: Mantel_Test
	DIM2	Mantel r statistic	p_value
	CA	0.46429	0.052778
	OM	0.35	0.194444
	APA	0.19286	0.273611
	all	0.40357	0.138889
	AK	0.40357	0.138889
	SA	-0.08214	0.541667
	TN	0.57857	0.048611
	AP	0.56071	0.033333
env1	env2	p	r
APA	SA	0.0583333	0.828571
CA	SA	0.0583333	0.828571
CA	APA	0.241667	0.6
TN	SA	1	0.0285714
TN	APA	0.802778	-0.142857
TN	CA	0.658333	0.257143
AP	SA	0.102778	0.771429
AP	APA	0.355556	0.485714
AP	CA	0.0166667	0.942857
AP	TN	0.497222	0.371429
AK	SA	0.497222	0.371429
AK	APA	0.102778	0.771429
AK	CA	0.802778	0.142857
AK	TN	0.919444	0.0857143
AK	AP	1	0.0285714
OM	SA	1	-0.0285714
OM	APA	0.658333	0.257143
OM	CA	1	-0.0285714
OM	TN	0.241667	0.6
OM	AP	0.919444	0.0857143
OM	AK	0.175	0.657143
