# Supplementary material for: Interactive effects between soil properties and bacterial communities in tomato rhizosphere under the application of microbial agents
Source: PeerJ. 2025 Jun 30;13:e19564. doi: 10.7717/peerj.19564 (PMC12225625; doi:10.7717/peerj.19564)
Supplement: Supplemental Information 6 [file peerj-13-19564-s006.xls]

## Sheet: TOMATO-function_prediction0
#group		FQ_CK	FQ_T1	FQ_T2	FQ_T3	FQ_T4	FQ_T5							AVE》0.01
ureolysis		168	242	197	107	153	159	0.00974704	0.013982	0.0110241	0.00682311	0.00928285	0.00951355	0.0100621
phototrophy		171	211	341	129	74	155	0.00992109	0.0121909	0.0190823	0.00822599	0.00448975	0.00927422	0.0105307
chitinolysis		204	205	147	115	213	186	0.0118357	0.0118442	0.00822608	0.00733325	0.0129232	0.0111291	0.0105486
cellulolysis		195	197	299	145	166	97	0.0113135	0.011382	0.016732	0.00924627	0.0100716	0.00580387	0.0107582
xylanolysis		203	310	166	151	180	131	0.0117777	0.0179108	0.00928931	0.00962887	0.010921	0.00783821	0.0112276
nitrate_respiration		140	169	235	293	168	268	0.00812253	0.00976427	0.0131505	0.0186838	0.0101929	0.0160354	0.0126583
nitrogen_respiration		140	169	235	293	168	268	0.00812253	0.00976427	0.0131505	0.0186838	0.0101929	0.0160354	0.0126583
dark_thiosulfate_oxidation		319	170	223	210	267	242	0.0185078	0.00982205	0.012479	0.0133911	0.0161995	0.0144797	0.0141465
dark_oxidation_of_sulfur_compounds		319	178	229	211	271	249	0.0185078	0.0102843	0.0128148	0.0134549	0.0164422	0.0148986	0.0144004
intracellular_parasites		194	488	204	383	104	164	0.0112555	0.0281951	0.0114158	0.0244229	0.00630991	0.00981272	0.0152353
human_pathogens_pneumonia		288	221	243	328	386	321	0.0167092	0.0127687	0.0135982	0.0209157	0.0234195	0.0192066	0.0177696
human_pathogens_all		344	300	350	533	511	406	0.0199582	0.017333	0.0195859	0.033988	0.0310035	0.0242925	0.0243602
animal_parasites_or_symbionts		375	356	377	565	533	434	0.0217568	0.0205685	0.0210968	0.0360286	0.0323383	0.0259678	0.0262928
fermentation		1200	872	853	624	581	803	0.0696217	0.0503813	0.0477336	0.0397908	0.0352506	0.0480464	0.0484708
nitrate_reduction		725	840	1077	1083	824	994	0.0420631	0.0485325	0.0602686	0.0690601	0.0499939	0.0594747	0.0548988
manganese_oxidation		815	1321	1786	1301	2469	954	0.0472848	0.0763231	0.099944	0.0829614	0.1498	0.0570813	0.0855657
aerobic_chemoheterotrophy		4130	3758	3724	3118	3485	3759	0.239615	0.217125	0.208394	0.198827	0.211443	0.224915	0.21672
chemoheterotrophy		5755	5094	4726	3917	4286	4752	0.333894	0.294315	0.264466	0.249777	0.260041	0.28433	0.281137
sum		17236	17308	17870	15682	16482	16713	1	1	1	1	1	1	1
#group		FQ_CK	FQ_T1	FQ_T2	FQ_T3	FQ_T4	FQ_T5							AVE》0.01
ureolysis		168	242	197	107	153	159	0.00974704	0.013982	0.0110241	0.00682311	0.00928285	0.00951355	0.0100621
phototrophy		171	211	341	129	74	155	0.00992109	0.0121909	0.0190823	0.00822599	0.00448975	0.00927422	0.0105307
chitinolysis		204	205	147	115	213	186	0.0118357	0.0118442	0.00822608	0.00733325	0.0129232	0.0111291	0.0105486
cellulolysis		195	197	299	145	166	97	0.0113135	0.011382	0.016732	0.00924627	0.0100716	0.00580387	0.0107582
xylanolysis		203	310	166	151	180	131	0.0117777	0.0179108	0.00928931	0.00962887	0.010921	0.00783821	0.0112276
nitrate_respiration		140	169	235	293	168	268	0.00812253	0.00976427	0.0131505	0.0186838	0.0101929	0.0160354	0.0126583
nitrogen_respiration		140	169	235	293	168	268	0.00812253	0.00976427	0.0131505	0.0186838	0.0101929	0.0160354	0.0126583
dark_thiosulfate_oxidation		319	170	223	210	267	242	0.0185078	0.00982205	0.012479	0.0133911	0.0161995	0.0144797	0.0141465
dark_oxidation_of_sulfur_compounds		319	178	229	211	271	249	0.0185078	0.0102843	0.0128148	0.0134549	0.0164422	0.0148986	0.0144004
intracellular_parasites		194	488	204	383	104	164	0.0112555	0.0281951	0.0114158	0.0244229	0.00630991	0.00981272	0.0152353
human_pathogens_pneumonia		288	221	243	328	386	321	0.0167092	0.0127687	0.0135982	0.0209157	0.0234195	0.0192066	0.0177696
human_pathogens_all		344	300	350	533	511	406	0.0199582	0.017333	0.0195859	0.033988	0.0310035	0.0242925	0.0243602
animal_parasites_or_symbionts		375	356	377	565	533	434	0.0217568	0.0205685	0.0210968	0.0360286	0.0323383	0.0259678	0.0262928
fermentation		1200	872	853	624	581	803	0.0696217	0.0503813	0.0477336	0.0397908	0.0352506	0.0480464	0.0484708
nitrate_reduction		725	840	1077	1083	824	994	0.0420631	0.0485325	0.0602686	0.0690601	0.0499939	0.0594747	0.0548988
manganese_oxidation		815	1321	1786	1301	2469	954	0.0472848	0.0763231	0.099944	0.0829614	0.1498	0.0570813	0.0855657
aerobic_chemoheterotrophy		4130	3758	3724	3118	3485	3759	0.239615	0.217125	0.208394	0.198827	0.211443	0.224915	0.21672
chemoheterotrophy		5755	5094	4726	3917	4286	4752	0.333894	0.294315	0.264466	0.249777	0.260041	0.28433	0.281137
#group		FQ_CK	FQ_T1	FQ_T2	FQ_T3	FQ_T4	FQ_T5
chemoheterotrophy		0.333894	0.294315	0.264466	0.249777	0.260041	0.28433	0.281137
aerobic_chemoheterotrophy		0.239615	0.217125	0.208394	0.198827	0.211443	0.224915	0.21672
manganese_oxidation		0.0472848	0.0763231	0.099944	0.0829614	0.1498	0.0570813	0.0855657
nitrate_reduction		0.0420631	0.0485325	0.0602686	0.0690601	0.0499939	0.0594747	0.0548988
fermentation		0.0696217	0.0503813	0.0477336	0.0397908	0.0352506	0.0480464	0.0484708
animal_parasites_or_symbionts		0.0217568	0.0205685	0.0210968	0.0360286	0.0323383	0.0259678	0.0262928
human_pathogens_all		0.0199582	0.017333	0.0195859	0.033988	0.0310035	0.0242925	0.0243602
human_pathogens_pneumonia		0.0167092	0.0127687	0.0135982	0.0209157	0.0234195	0.0192066	0.0177696
intracellular_parasites		0.0112555	0.0281951	0.0114158	0.0244229	0.00630991	0.00981272	0.0152353
dark_oxidation_of_sulfur_compounds		0.0185078	0.0102843	0.0128148	0.0134549	0.0164422	0.0148986	0.0144004
dark_thiosulfate_oxidation		0.0185078	0.00982205	0.012479	0.0133911	0.0161995	0.0144797	0.0141465
nitrate_respiration		0.00812253	0.00976427	0.0131505	0.0186838	0.0101929	0.0160354	0.0126583
nitrogen_respiration		0.00812253	0.00976427	0.0131505	0.0186838	0.0101929	0.0160354	0.0126583
xylanolysis		0.0117777	0.0179108	0.00928931	0.00962887	0.010921	0.00783821	0.0112276
cellulolysis		0.0113135	0.011382	0.016732	0.00924627	0.0100716	0.00580387	0.0107582
chitinolysis		0.0118357	0.0118442	0.00822608	0.00733325	0.0129232	0.0111291	0.0105486
phototrophy		0.00992109	0.0121909	0.0190823	0.00822599	0.00448975	0.00927422	0.0105307
ureolysis		0.00974704	0.013982	0.0110241	0.00682311	0.00928285	0.00951355	0.0100621
others		0.0899861	0.127513	0.137549	0.138758	0.0996845	0.141866	0.122559
		0.910014	0.872487	0.862451	0.861242	0.900315	0.858134	0.877441
