# Supplementary material for: Interactive effects between soil properties and bacterial communities in tomato rhizosphere under the application of microbial agents
Source: PeerJ. 2025 Jun 30;13:e19564. doi: 10.7717/peerj.19564 (PMC12225625; doi:10.7717/peerj.19564)
Supplement: Supplemental Information 8 [file peerj-13-19564-s008.xls]

## Sheet: TOMATO
OTU ID	FQ_CK	FQ_T5	FQ_T4	FQ_T3	FQ_T2	FQ_T1						31351		AVE
d__Bacteria; k__norank_d__Bacteria; p__Firmicutes; c__Bacilli; o__Bacillales; f__Bacillaceae; g__Bacillus	1303	2106	2060	2120	2174	1477	31351	0.0415617	0.0671749	0.0657076	0.0676214	0.0693439	0.0471117	0.0597535	1
d__Bacteria; k__norank_d__Bacteria; p__Firmicutes; c__Bacilli; o__Bacillales; f__Planococcaceae; g__Paenisporosarcina	629	745	2268	1152	1590	1145	31351	0.0200632	0.0237632	0.0723422	0.0367452	0.0507161	0.036522	0.0400253	2
d__Bacteria; k__norank_d__Bacteria; p__Chloroflexi; c__Anaerolineae; o__SBR1031; f__A4b; g__norank_f__A4b	1575	807	663	642	819	1233	31351	0.0502376	0.0257408	0.0211477	0.0204778	0.0261236	0.0393289	0.0305094	3
d__Bacteria; k__norank_d__Bacteria; p__Acidobacteriota; c__Vicinamibacteria; o__Vicinamibacterales; f__norank_o__Vicinamibacterales; g__norank_f__norank_o__Vicinamibacterales	621	930	1105	983	827	1033	31351	0.019808	0.0296641	0.0352461	0.0313547	0.0263787	0.0329495	0.0292335	4
d__Bacteria; k__norank_d__Bacteria; p__Actinobacteriota; c__Acidimicrobiia; o__Actinomarinales; f__norank_o__Actinomarinales; g__norank_f__norank_o__Actinomarinales	688	906	894	806	901	1036	31351	0.0219451	0.0288986	0.0285158	0.0257089	0.0287391	0.0330452	0.0278088	5
d__Bacteria; k__norank_d__Bacteria; p__Acidobacteriota; c__Vicinamibacteria; o__Vicinamibacterales; f__Vicinamibacteraceae; g__norank_f__Vicinamibacteraceae	425	618	939	792	521	718	31351	0.0135562	0.0197123	0.0299512	0.0252624	0.0166183	0.022902	0.0213337	6
d__Bacteria; k__norank_d__Bacteria; p__Nitrospirota; c__Nitrospiria; o__Nitrospirales; f__Nitrospiraceae; g__Nitrospira	501	613	360	572	524	509	31351	0.0159804	0.0195528	0.0114829	0.018245	0.016714	0.0162355	0.0163684	7
d__Bacteria; k__norank_d__Bacteria; p__Myxococcota; c__bacteriap25; o__norank_c__bacteriap25; f__norank_o__norank_c__bacteriap25; g__norank_f__norank_o__norank_c__bacteriap25	317	602	632	699	442	337	31351	0.0101113	0.0192019	0.0201588	0.0222959	0.0140984	0.0107493	0.0161026	8
d__Bacteria; k__norank_d__Bacteria; p__Chloroflexi; c__Chloroflexia; o__Thermomicrobiales; f__JG30-KF-CM45; g__norank_f__JG30-KF-CM45	914	481	204	270	437	492	31351	0.0291538	0.0153424	0.00650697	0.00861216	0.0139389	0.0156933	0.0148746	9
d__Bacteria; k__norank_d__Bacteria; p__Proteobacteria; c__Alphaproteobacteria; o__Tistrellales; f__Geminicoccaceae; g__norank_f__Geminicoccaceae	364	511	360	442	523	490	31351	0.0116105	0.0162993	0.0114829	0.0140984	0.0166821	0.0156295	0.0143004	10
d__Bacteria; k__norank_d__Bacteria; p__Actinobacteriota; c__Actinobacteria; o__Micrococcales; f__Micrococcaceae; g__Pseudarthrobacter	442	369	408	365	739	277	31351	0.0140984	0.01177	0.0130139	0.0116424	0.0235718	0.00883544	0.013822	11
d__Bacteria; k__norank_d__Bacteria; p__Proteobacteria; c__Alphaproteobacteria; o__norank_c__Alphaproteobacteria; f__norank_o__norank_c__Alphaproteobacteria; g__norank_f__norank_o__norank_c__Alphaproteobacteria	350	417	392	384	318	454	31351	0.0111639	0.013301	0.0125036	0.0122484	0.0101432	0.0144812	0.0123069	12
d__Bacteria; k__norank_d__Bacteria; p__Gemmatimonadota; c__Gemmatimonadetes; o__Gemmatimonadales; f__Gemmatimonadaceae; g__norank_f__Gemmatimonadaceae	370	500	419	404	276	214	31351	0.0118019	0.0159485	0.0133648	0.0128864	0.00880355	0.00682594	0.0116052	13
d__Bacteria; k__norank_d__Bacteria; p__Proteobacteria; c__Alphaproteobacteria; o__Sphingomonadales; f__Sphingomonadaceae; g__Sphingomonas	331	321	325	436	447	255	31351	0.0105579	0.0102389	0.0103665	0.0139071	0.0142579	0.00813371	0.0112437	14
d__Bacteria; k__norank_d__Bacteria; p__Bacteroidota; c__Bacteroidia; o__Cytophagales; f__Microscillaceae; g__norank_f__Microscillaceae	678	303	183	257	364	272	31351	0.0216261	0.00966476	0.00583713	0.00819751	0.0116105	0.00867596	0.0109353	15
d__Bacteria; k__norank_d__Bacteria; p__Proteobacteria; c__Alphaproteobacteria; o__Rhizobiales; f__Methyloligellaceae; g__norank_f__Methyloligellaceae	241	404	348	373	293	304	31351	0.00768716	0.0128864	0.0111001	0.0118975	0.00934579	0.00969666	0.0104356	16
d__Bacteria; k__norank_d__Bacteria; p__Bacteroidota; c__Bacteroidia; o__Cytophagales; f__Microscillaceae; g__Chryseolinea	415	133	306	280	371	394	31351	0.0132372	0.00424229	0.00976045	0.00893113	0.0118338	0.0125674	0.0100954	17
d__Bacteria; k__norank_d__Bacteria; p__Acidobacteriota; c__Blastocatellia; o__Pyrinomonadales; f__Pyrinomonadaceae; g__RB41	253	292	299	436	409	209	31351	0.00806992	0.0093139	0.00953718	0.0139071	0.0130458	0.00666645	0.0100901	18
d__Bacteria; k__norank_d__Bacteria; p__Chloroflexi; c__Anaerolineae; o__SBR1031; f__norank_o__SBR1031; g__norank_f__norank_o__SBR1031	501	199	178	264	316	427	31351	0.0159804	0.00634748	0.00567765	0.00842078	0.0100794	0.01362	0.0100209	19
d__Bacteria; k__norank_d__Bacteria; p__Acidobacteriota; c__Acidobacteriae; o__Bryobacterales; f__Bryobacteraceae; g__Bryobacter	410	281	260	315	353	238	31351
d__Bacteria; k__norank_d__Bacteria; p__Chloroflexi; c__Dehalococcoidia; o__S085; f__norank_o__S085; g__norank_f__norank_o__S085	177	349	376	237	303	323	31351
d__Bacteria; k__norank_d__Bacteria; p__Proteobacteria; c__Alphaproteobacteria; o__Rhizobiales; f__Xanthobacteraceae; g__norank_f__Xanthobacteraceae	263	353	321	326	215	256	31351
d__Bacteria; k__norank_d__Bacteria; p__unclassified_k__norank_d__Bacteria; c__unclassified_k__norank_d__Bacteria; o__unclassified_k__norank_d__Bacteria; f__unclassified_k__norank_d__Bacteria; g__unclassified_k__norank_d__Bacteria	215	349	260	299	269	206	31351
d__Bacteria; k__norank_d__Bacteria; p__Proteobacteria; c__Gammaproteobacteria; o__Steroidobacterales; f__Steroidobacteraceae; g__Steroidobacter	384	275	161	176	287	135	31351
d__Bacteria; k__norank_d__Bacteria; p__Proteobacteria; c__Gammaproteobacteria; o__Steroidobacterales; f__Woeseiaceae; g__Woeseia	223	195	229	247	270	242
d__Bacteria; k__norank_d__Bacteria; p__Proteobacteria; c__Alphaproteobacteria; o__Rhizobiales; f__Rhizobiaceae; g__Ensifer	297	207	196	203	229	198		FQ_CK	FQ_T5	FQ_T4	FQ_T3	FQ_T2	FQ_T1
d__Bacteria; k__norank_d__Bacteria; p__Entotheonellaeota; c__Entotheonellia; o__Entotheonellales; f__Entotheonellaceae; g__norank_f__Entotheonellaceae	165	244	246	330	186	129	Bacillus	0.0415617	0.0671749	0.0657076	0.0676214	0.0693439	0.0471117	0.0597535	1
d__Bacteria; k__norank_d__Bacteria; p__Proteobacteria; c__Gammaproteobacteria; o__Gammaproteobacteria_Incertae_Sedis; f__unclassified_o__Gammaproteobacteria_Incertae_Sedis; g__Acidibacter	520	174	132	88	203	142	Paenisporosarcina	0.0200632	0.0237632	0.0723422	0.0367452	0.0507161	0.036522	0.0400253	2
d__Bacteria; k__norank_d__Bacteria; p__Proteobacteria; c__Gammaproteobacteria; o__PLTA13; f__norank_o__PLTA13; g__norank_f__norank_o__PLTA13	138	189	261	349	135	139	norank_f__A4b	0.0502376	0.0257408	0.0211477	0.0204778	0.0261236	0.0393289	0.0305094	3
d__Bacteria; k__norank_d__Bacteria; p__Actinobacteriota; c__Actinobacteria; o__Streptomycetales; f__Streptomycetaceae; g__Streptomyces	142	203	164	147	167	354	_norank_f__norank_o__Vicinamibacterales	0.019808	0.0296641	0.0352461	0.0313547	0.0263787	0.0329495	0.0292335	4
d__Bacteria; k__norank_d__Bacteria; p__Chloroflexi; c__Anaerolineae; o__Ardenticatenales; f__norank_o__Ardenticatenales; g__norank_f__norank_o__Ardenticatenales	101	200	157	258	215	239	norank_f__norank_o__Actinomarinales	0.0219451	0.0288986	0.0285158	0.0257089	0.0287391	0.0330452	0.0278088	5
d__Bacteria; k__norank_d__Bacteria; p__Acidobacteriota; c__Thermoanaerobaculia; o__Thermoanaerobaculales; f__Thermoanaerobaculaceae; g__Subgroup_10	147	201	251	198	174	197	norank_f__Vicinamibacteraceae	0.0135562	0.0197123	0.0299512	0.0252624	0.0166183	0.022902	0.0213337	6
d__Bacteria; k__norank_d__Bacteria; p__Chloroflexi; c__Chloroflexia; o__Thermomicrobiales; f__AKYG1722; g__norank_f__AKYG1722	253	168	164	174	207	201	Nitrospira	0.0159804	0.0195528	0.0114829	0.018245	0.016714	0.0162355	0.0163684	7
d__Bacteria; k__norank_d__Bacteria; p__Proteobacteria; c__Alphaproteobacteria; o__Rhizobiales; f__Hyphomicrobiaceae; g__Pedomicrobium	262	202	122	164	169	192	norank_f__norank_o__norank_c__bacteriap25	0.0101113	0.0192019	0.0201588	0.0222959	0.0140984	0.0107493	0.0161026	8
d__Bacteria; k__norank_d__Bacteria; p__Proteobacteria; c__Gammaproteobacteria; o__Burkholderiales; f__TRA3-20; g__norank_f__TRA3-20	126	248	235	219	146	113	norank_f__JG30-KF-CM45	0.0291538	0.0153424	0.00650697	0.00861216	0.0139389	0.0156933	0.0148746	9
d__Bacteria; k__norank_d__Bacteria; p__Proteobacteria; c__Alphaproteobacteria; o__Rhizobiales; f__Amb-16S-1323; g__norank_f__Amb-16S-1323	151	190	192	184	161	187	norank_f__Geminicoccaceae	0.0116105	0.0162993	0.0114829	0.0140984	0.0166821	0.0156295	0.0143004	10
d__Bacteria; k__norank_d__Bacteria; p__Proteobacteria; c__Gammaproteobacteria; o__Pseudomonadales; f__Pseudomonadaceae; g__Pseudomonas	224	214	146	190	149	142	Pseudarthrobacter	0.0140984	0.01177	0.0130139	0.0116424	0.0235718	0.00883544	0.013822
d__Bacteria; k__norank_d__Bacteria; p__Methylomirabilota; c__Methylomirabilia; o__Rokubacteriales; f__norank_o__Rokubacteriales; g__norank_f__norank_o__Rokubacteriales	104	225	220	196	161	138	norank_f__norank_o__norank_c__Alphaproteobacteria	0.0111639	0.013301	0.0125036	0.0122484	0.0101432	0.0144812	0.0123069
d__Bacteria; k__norank_d__Bacteria; p__Firmicutes; c__Bacilli; o__Paenibacillales; f__Paenibacillaceae; g__Paenibacillus	122	199	186	160	172	197	norank_f__Gemmatimonadaceae	0.0118019	0.0159485	0.0133648	0.0128864	0.00880355	0.00682594	0.0116052
d__Bacteria; k__norank_d__Bacteria; p__NB1-j; c__norank_p__NB1-j; o__norank_c__norank_p__NB1-j; f__norank_o__norank_c__norank_p__NB1-j; g__norank_f__norank_o__norank_c__norank_p__NB1-j	94	192	271	245	105	120	d__Bacteria; k__norank_d__Bacteria; p__Proteobacteria; c__Alphaproteobacteria; o__Sphingomonadales; f__Sphingomonadaceae; g__Sphingomonas	0.0105579	0.0102389	0.0103665	0.0139071	0.0142579	0.00813371	0.0112437
d__Bacteria; k__norank_d__Bacteria; p__Chloroflexi; c__Anaerolineae; o__Caldilineales; f__Caldilineaceae; g__norank_f__Caldilineaceae	281	166	77	166	153	165	d__Bacteria; k__norank_d__Bacteria; p__Bacteroidota; c__Bacteroidia; o__Cytophagales; f__Microscillaceae; g__norank_f__Microscillaceae	0.0216261	0.00966476	0.00583713	0.00819751	0.0116105	0.00867596	0.0109353
d__Bacteria; k__norank_d__Bacteria; p__Acidobacteriota; c__Blastocatellia; o__Blastocatellales; f__Blastocatellaceae; g__Stenotrophobacter	188	122	125	114	147	305	d__Bacteria; k__norank_d__Bacteria; p__Proteobacteria; c__Alphaproteobacteria; o__Rhizobiales; f__Methyloligellaceae; g__norank_f__Methyloligellaceae	0.00768716	0.0128864	0.0111001	0.0118975	0.00934579	0.00969666	0.0104356
d__Bacteria; k__norank_d__Bacteria; p__Firmicutes; c__Clostridia; o__Peptostreptococcales-Tissierellales; f__Peptostreptococcaceae; g__Romboutsia	367	132	59	72	103	249	d__Bacteria; k__norank_d__Bacteria; p__Bacteroidota; c__Bacteroidia; o__Cytophagales; f__Microscillaceae; g__Chryseolinea	0.0132372	0.00424229	0.00976045	0.00893113	0.0118338	0.0125674	0.0100954
d__Bacteria; k__norank_d__Bacteria; p__Firmicutes; c__Bacilli; o__Erysipelotrichales; f__Erysipelotrichaceae; g__Turicibacter	296	104	132	97	102	208	d__Bacteria; k__norank_d__Bacteria; p__Acidobacteriota; c__Blastocatellia; o__Pyrinomonadales; f__Pyrinomonadaceae; g__RB41	0.00806992	0.0093139	0.00953718	0.0139071	0.0130458	0.00666645	0.0100901
d__Bacteria; k__norank_d__Bacteria; p__Gemmatimonadota; c__AKAU4049; o__norank_c__AKAU4049; f__norank_o__norank_c__AKAU4049; g__norank_f__norank_o__norank_c__AKAU4049	128	160	148	150	213	132	d__Bacteria; k__norank_d__Bacteria; p__Chloroflexi; c__Anaerolineae; o__SBR1031; f__norank_o__SBR1031; g__norank_f__norank_o__SBR1031	0.0159804	0.00634748	0.00567765	0.00842078	0.0100794	0.01362	0.0100209
d__Bacteria; k__norank_d__Bacteria; p__Proteobacteria; c__Gammaproteobacteria; o__Xanthomonadales; f__Xanthomonadaceae; g__Lysobacter	184	178	171	114	118	161								AVERAGE
d__Bacteria; k__norank_d__Bacteria; p__Proteobacteria; c__Gammaproteobacteria; o__Burkholderiales; f__Nitrosomonadaceae; g__MND1	77	208	206	199	109	117	TOP10	0.234028	0.26535	0.302542	0.270422	0.279353	0.270167	0.27031
d__Bacteria; k__norank_d__Bacteria; p__Gemmatimonadota; c__S0134_terrestrial_group; o__norank_c__S0134_terrestrial_group; f__norank_o__norank_c__S0134_terrestrial_group; g__norank_f__norank_o__norank_c__S0134_terrestrial_group	117	191	169	145	142	146	others	0.765972	0.73465	0.697458	0.729578	0.720647	0.729833	0.72969
d__Bacteria; k__norank_d__Bacteria; p__Proteobacteria; c__Alphaproteobacteria; o__Rhizobiales; f__Devosiaceae; g__Devosia	223	139	159	69	148	164	TOP10 UNNAME	0.0776052	0.110491	0.149533	0.122612	0.136774	0.0998692	0.116147	0.116147	0.429681
d__Bacteria; k__norank_d__Bacteria; p__Firmicutes; c__Bacilli; o__Bacillales; f__Planococcaceae; g__Lysinibacillus	282	179	145	57	119	113		FQ_CK	FQ_T1	FQ_T2	FQ_T3	FQ_T4	FQ_T5	1-5AVERAGE	(1-5AVERQGE)-ck	((1-5AVERAGE)-ck)/ck
d__Bacteria; k__norank_d__Bacteria; p__Actinobacteriota; c__Actinobacteria; o__Micrococcales; f__Microbacteriaceae; g__Agromyces	119	128	195	147	133	157	Bacillus	0.0415617	0.0471117	0.0693439	0.0676214	0.0657076	0.0671749	0.0633919	0.0218302	0.525249	1
d__Bacteria; k__norank_d__Bacteria; p__Chloroflexi; c__KD4-96; o__norank_c__KD4-96; f__norank_o__norank_c__KD4-96; g__norank_f__norank_o__norank_c__KD4-96	107	173	124	183	122	149	Paenisporosarcina	0.0200632	0.036522	0.0507161	0.0367452	0.0723422	0.0237632	0.0440177	0.0239546	1.19396	2
d__Bacteria; k__norank_d__Bacteria; p__Acidobacteriota; c__Acidobacteriae; o__PAUC26f; f__norank_o__PAUC26f; g__norank_f__norank_o__PAUC26f	92	205	208	132	114	94	norank_f__A4b	0.0502376	0.0393289	0.0261236	0.0204778	0.0211477	0.0257408	0.0265637	-0.0236739	-0.471238	3
d__Bacteria; k__norank_d__Bacteria; p__Entotheonellaeota; c__Entotheonellia; o__Entotheonellales; f__Entotheonellaceae; g__Candidatus_Entotheonella	101	146	146	172	152	118	_norank_f__norank_o__Vicinamibacterales	0.019808	0.0329495	0.0263787	0.0313547	0.0352461	0.0296641	0.0311186	0.0113106	0.571014	4
d__Bacteria; k__norank_d__Bacteria; p__Proteobacteria; c__Alphaproteobacteria; o__Rhizobiales; f__Rhizobiaceae; g__unclassified_f__Rhizobiaceae	180	143	100	95	126	186	norank_f__norank_o__Actinomarinales	0.0219451	0.0330452	0.0287391	0.0257089	0.0285158	0.0288986	0.0289815	0.00703646	0.32064	5
d__Bacteria; k__norank_d__Bacteria; p__Proteobacteria; c__Gammaproteobacteria; o__Diplorickettsiales; f__Diplorickettsiaceae; g__Aquicella	83	103	182	256	116	82	norank_f__Vicinamibacteraceae	0.0135562	0.022902	0.0166183	0.0252624	0.0299512	0.0197123	0.0228892	0.00933304	0.688471	6
d__Bacteria; k__norank_d__Bacteria; p__Bacteroidota; c__Bacteroidia; o__Chitinophagales; f__Saprospiraceae; g__norank_f__Saprospiraceae	110	149	146	139	118	158	Nitrospira	0.0159804	0.0162355	0.016714	0.018245	0.0114829	0.0195528	0.016446	0.000465695	0.0291417	7
d__Bacteria; k__norank_d__Bacteria; p__Actinobacteriota; c__Actinobacteria; o__Streptosporangiales; f__Streptosporangiaceae; g__unclassified_f__Streptosporangiaceae	99	124	141	111	199	138	norank_f__norank_o__norank_c__bacteriap25	0.0101113	0.0107493	0.0140984	0.0222959	0.0201588	0.0192019	0.0173009	0.00718956	0.711041	8
d__Bacteria; k__norank_d__Bacteria; p__Proteobacteria; c__Gammaproteobacteria; o__CCD24; f__norank_o__CCD24; g__norank_f__norank_o__CCD24	167	160	124	111	126	109	norank_f__JG30-KF-CM45	0.0291538	0.0156933	0.0139389	0.00861216	0.00650697	0.0153424	0.0120188	-0.017135	-0.587746	9
d__Bacteria; k__norank_d__Bacteria; p__Proteobacteria; c__Alphaproteobacteria; o__Rhizobiales; f__Hyphomicrobiaceae; g__Hyphomicrobium	166	107	128	146	115	121	norank_f__Geminicoccaceae	0.0116105	0.0156295	0.0166821	0.0140984	0.0114829	0.0162993	0.0148384	0.00322797	0.278022	10
d__Bacteria; k__norank_d__Bacteria; p__Gemmatimonadota; c__Gemmatimonadetes; o__Gemmatimonadales; f__Gemmatimonadaceae; g__unclassified_f__Gemmatimonadaceae	101	142	180	157	116	72	others	0.765972	0.729833	0.720647	0.729578	0.697458	0.73465	0.722433	-0.0435393	-0.0568418	11
d__Bacteria; k__norank_d__Bacteria; p__Proteobacteria; c__Gammaproteobacteria; o__unclassified_c__Gammaproteobacteria; f__unclassified_c__Gammaproteobacteria; g__unclassified_c__Gammaproteobacteria	61	103	154	190	124	119
d__Bacteria; k__norank_d__Bacteria; p__Desulfobacterota; c__norank_p__Desulfobacterota; o__norank_c__norank_p__Desulfobacterota; f__norank_o__norank_c__norank_p__Desulfobacterota; g__norank_f__norank_o__norank_c__norank_p__Desulfobacterota	65	122	180	185	84	97
d__Bacteria; k__norank_d__Bacteria; p__Firmicutes; c__Bacilli; o__Bacillales; f__Bacillaceae; g__unclassified_f__Bacillaceae	24	50	57	463	69	68
d__Bacteria; k__norank_d__Bacteria; p__Firmicutes; c__Bacilli; o__Bacillales; f__Planococcaceae; g__Sporosarcina	117	112	106	79	143	154
d__Bacteria; k__norank_d__Bacteria; p__Chloroflexi; c__JG30-KF-CM66; o__norank_c__JG30-KF-CM66; f__norank_o__norank_c__JG30-KF-CM66; g__norank_f__norank_o__norank_c__JG30-KF-CM66	62	106	100	133	164	140
d__Bacteria; k__norank_d__Bacteria; p__RCP2-54; c__norank_p__RCP2-54; o__norank_c__norank_p__RCP2-54; f__norank_o__norank_c__norank_p__RCP2-54; g__norank_f__norank_o__norank_c__norank_p__RCP2-54	92	118	148	151	102	90
d__Bacteria; k__norank_d__Bacteria; p__Firmicutes; c__Bacilli; o__Alicyclobacillales; f__Alicyclobacillaceae; g__Tumebacillus	70	131	125	130	139	102
d__Bacteria; k__norank_d__Bacteria; p__Proteobacteria; c__Alphaproteobacteria; o__Rhizobiales; f__Rhizobiales_Incertae_Sedis; g__Nordella	89	120	143	157	123	63
d__Bacteria; k__norank_d__Bacteria; p__Proteobacteria; c__Alphaproteobacteria; o__Azospirillales; f__norank_o__Azospirillales; g__norank_f__norank_o__Azospirillales	59	136	145	158	92	69
d__Bacteria; k__norank_d__Bacteria; p__Chloroflexi; c__OLB14; o__norank_c__OLB14; f__norank_o__norank_c__OLB14; g__norank_f__norank_o__norank_c__OLB14	91	66	116	94	131	150
d__Bacteria; k__norank_d__Bacteria; p__Actinobacteriota; c__MB-A2-108; o__norank_c__MB-A2-108; f__norank_o__norank_c__MB-A2-108; g__norank_f__norank_o__norank_c__MB-A2-108	44	155	131	115	97	87
d__Bacteria; k__norank_d__Bacteria; p__Chloroflexi; c__Anaerolineae; o__Anaerolineales; f__Anaerolineaceae; g__norank_f__Anaerolineaceae	182	145	31	89	56	124
d__Bacteria; k__norank_d__Bacteria; p__Actinobacteriota; c__Thermoleophilia; o__Gaiellales; f__Gaiellaceae; g__Gaiella	60	108	131	125	100	101
d__Bacteria; k__norank_d__Bacteria; p__Acidobacteriota; c__Subgroup_5; o__norank_c__Subgroup_5; f__norank_o__norank_c__Subgroup_5; g__norank_f__norank_o__norank_c__Subgroup_5	78	102	166	93	77	102
d__Bacteria; k__norank_d__Bacteria; p__Actinobacteriota; c__Acidimicrobiia; o__Microtrichales; f__Ilumatobacteraceae; g__Ilumatobacter	125	84	82	82	95	132
d__Bacteria; k__norank_d__Bacteria; p__MBNT15; c__norank_p__MBNT15; o__norank_c__norank_p__MBNT15; f__norank_o__norank_c__norank_p__MBNT15; g__norank_f__norank_o__norank_c__norank_p__MBNT15	75	82	92	208	73	66
d__Bacteria; k__norank_d__Bacteria; p__Myxococcota; c__Polyangia; o__Haliangiales; f__Haliangiaceae; g__Haliangium	101	80	113	89	96	96
d__Bacteria; k__norank_d__Bacteria; p__Proteobacteria; c__Alphaproteobacteria; o__Azospirillales; f__Azospirillaceae; g__Skermanella	84	129	99	87	114	61
d__Bacteria; k__norank_d__Bacteria; p__Chloroflexi; c__TK10; o__norank_c__TK10; f__norank_o__norank_c__TK10; g__norank_f__norank_o__norank_c__TK10	72	121	76	110	86	107
d__Bacteria; k__norank_d__Bacteria; p__Actinobacteriota; c__Acidimicrobiia; o__Microtrichales; f__norank_o__Microtrichales; g__norank_f__norank_o__Microtrichales	81	120	79	77	105	106
d__Bacteria; k__norank_d__Bacteria; p__Latescibacterota; c__norank_p__Latescibacterota; o__norank_c__norank_p__Latescibacterota; f__norank_o__norank_c__norank_p__Latescibacterota; g__norank_f__norank_o__norank_c__norank_p__Latescibacterota	38	130	134	147	59	44
d__Bacteria; k__norank_d__Bacteria; p__Proteobacteria; c__Gammaproteobacteria; o__Burkholderiales; f__Comamonadaceae; g__Hydrogenophaga	104	97	92	29	72	130
d__Bacteria; k__norank_d__Bacteria; p__Proteobacteria; c__Gammaproteobacteria; o__Steroidobacterales; f__Steroidobacteraceae; g__norank_f__Steroidobacteraceae	66	83	117	119	80	55
d__Bacteria; k__norank_d__Bacteria; p__Actinobacteriota; c__Thermoleophilia; o__Gaiellales; f__norank_o__Gaiellales; g__norank_f__norank_o__Gaiellales	53	123	91	95	69	77
d__Bacteria; k__norank_d__Bacteria; p__Proteobacteria; c__Alphaproteobacteria; o__Rhodobacterales; f__Rhodobacteraceae; g__unclassified_f__Rhodobacteraceae	110	111	26	25	70	153
d__Bacteria; k__norank_d__Bacteria; p__Proteobacteria; c__Gammaproteobacteria; o__R7C24; f__norank_o__R7C24; g__norank_f__norank_o__R7C24	204	81	37	19	79	71
d__Bacteria; k__norank_d__Bacteria; p__Firmicutes; c__Clostridia; o__Clostridiales; f__Clostridiaceae; g__Clostridium_sensu_stricto_1	174	51	56	38	45	100
d__Bacteria; k__norank_d__Bacteria; p__Proteobacteria; c__Alphaproteobacteria; o__Caulobacterales; f__Hyphomonadaceae; g__SWB02	62	67	110	90	65	62
d__Bacteria; k__norank_d__Bacteria; p__Proteobacteria; c__Alphaproteobacteria; o__Dongiales; f__Dongiaceae; g__Dongia	72	108	97	73	42	53
d__Bacteria; k__norank_d__Bacteria; p__Actinobacteriota; c__Acidimicrobiia; o__IMCC26256; f__norank_o__IMCC26256; g__norank_f__norank_o__IMCC26256	31	71	95	98	79	68
d__Bacteria; k__norank_d__Bacteria; p__Cyanobacteria; c__Cyanobacteriia; o__Chloroplast; f__norank_o__Chloroplast; g__norank_f__norank_o__Chloroplast	41	53	77	46	68	154
d__Bacteria; k__norank_d__Bacteria; p__Bacteroidota; c__Bacteroidia; o__Chitinophagales; f__Chitinophagaceae; g__Terrimonas	104	72	96	61	66	35
d__Bacteria; k__norank_d__Bacteria; p__Proteobacteria; c__Alphaproteobacteria; o__Caulobacterales; f__Hyphomonadaceae; g__Hirschia	113	44	59	55	92	66
d__Bacteria; k__norank_d__Bacteria; p__Myxococcota; c__Polyangia; o__Polyangiales; f__BIrii41; g__norank_f__BIrii41	126	81	56	48	66	51
d__Bacteria; k__norank_d__Bacteria; p__Proteobacteria; c__Gammaproteobacteria; o__Burkholderiales; f__Nitrosomonadaceae; g__Nitrosospira	136	57	49	62	61	58
d__Bacteria; k__norank_d__Bacteria; p__Proteobacteria; c__Alphaproteobacteria; o__Rhodobacterales; f__Rhodobacteraceae; g__Amaricoccus	65	82	58	74	72	66
d__Bacteria; k__norank_d__Bacteria; p__Proteobacteria; c__Alphaproteobacteria; o__Sphingomonadales; f__Sphingomonadaceae; g__Sphingobium	75	67	83	36	91	62
d__Bacteria; k__norank_d__Bacteria; p__Firmicutes; c__Bacilli; o__Thermoactinomycetales; f__Thermoactinomycetaceae; g__Planifilum	76	67	36	72	56	104
d__Bacteria; k__norank_d__Bacteria; p__Verrucomicrobiota; c__Verrucomicrobiae; o__Pedosphaerales; f__Pedosphaeraceae; g__norank_f__Pedosphaeraceae	82	96	29	88	36	68
d__Bacteria; k__norank_d__Bacteria; p__Bdellovibrionota; c__Oligoflexia; o__Oligoflexales; f__norank_o__Oligoflexales; g__Oligoflexus	179	22	12	47	68	56
d__Bacteria; k__norank_d__Bacteria; p__Firmicutes; c__Clostridia; o__Peptostreptococcales-Tissierellales; f__Peptostreptococcaceae; g__Paeniclostridium	166	33	29	20	47	89
d__Bacteria; k__norank_d__Bacteria; p__Acidobacteriota; c__Vicinamibacteria; o__Subgroup_9; f__norank_o__Subgroup_9; g__norank_f__norank_o__Subgroup_9	48	68	92	57	55	62
d__Bacteria; k__norank_d__Bacteria; p__Actinobacteriota; c__Actinobacteria; o__Micromonosporales; f__Micromonosporaceae; g__unclassified_f__Micromonosporaceae	77	59	63	56	47	80
d__Bacteria; k__norank_d__Bacteria; p__Actinobacteriota; c__Thermoleophilia; o__Solirubrobacterales; f__67-14; g__norank_f__67-14	36	86	45	57	67	88
d__Bacteria; k__norank_d__Bacteria; p__Bacteroidota; c__Bacteroidia; o__Chitinophagales; f__Chitinophagaceae; g__UTBCD1	60	83	83	65	43	45
d__Bacteria; k__norank_d__Bacteria; p__Proteobacteria; c__Alphaproteobacteria; o__unclassified_c__Alphaproteobacteria; f__unclassified_c__Alphaproteobacteria; g__unclassified_c__Alphaproteobacteria	62	64	42	58	66	83
d__Bacteria; k__norank_d__Bacteria; p__Proteobacteria; c__Alphaproteobacteria; o__Rhizobiales; f__Rhodomicrobiaceae; g__Rhodomicrobium	125	22	28	30	108	57
d__Bacteria; k__norank_d__Bacteria; p__Firmicutes; c__Bacilli; o__Bacillales; f__Bacillaceae; g__Geobacillus	253	21	18	10	19	46
d__Bacteria; k__norank_d__Bacteria; p__Proteobacteria; c__Gammaproteobacteria; o__Burkholderiales; f__Comamonadaceae; g__unclassified_f__Comamonadaceae	37	77	106	54	43	48
d__Bacteria; k__norank_d__Bacteria; p__Acidobacteriota; c__Blastocatellia; o__11-24; f__norank_o__11-24; g__norank_f__norank_o__11-24	31	74	74	60	49	73
d__Bacteria; k__norank_d__Bacteria; p__Acidobacteriota; c__Blastocatellia; o__Blastocatellales; f__Blastocatellaceae; g__norank_f__Blastocatellaceae	56	61	70	53	60	53
d__Bacteria; k__norank_d__Bacteria; p__Firmicutes; c__Bacilli; o__Bacillales; f__Planococcaceae; g__Planomicrobium	96	61	35	20	77	63
d__Bacteria; k__norank_d__Bacteria; p__Gemmatimonadota; c__BD2-11_terrestrial_group; o__norank_c__BD2-11_terrestrial_group; f__norank_o__norank_c__BD2-11_terrestrial_group; g__norank_f__norank_o__norank_c__BD2-11_terrestrial_group	34	77	53	65	47	73
d__Bacteria; k__norank_d__Bacteria; p__Actinobacteriota; c__Actinobacteria; o__Corynebacteriales; f__Mycobacteriaceae; g__Mycobacterium	47	71	58	54	52	65
d__Bacteria; k__norank_d__Bacteria; p__Firmicutes; c__Bacilli; o__Thermoactinomycetales; f__Thermoactinomycetaceae; g__Thermoactinomyces	78	49	46	43	58	71
d__Bacteria; k__norank_d__Bacteria; p__Dependentiae; c__Babeliae; o__Babeliales; f__Vermiphilaceae; g__norank_f__Vermiphilaceae	21	53	116	57	44	49
d__Bacteria; k__norank_d__Bacteria; p__Actinobacteriota; c__Actinobacteria; o__Micrococcales; f__Microbacteriaceae; g__Microterricola	74	34	54	48	54	75
d__Bacteria; k__norank_d__Bacteria; p__Chloroflexi; c__Anaerolineae; o__SBR1031; f__A4b; g__OLB13	101	48	34	24	36	90
d__Bacteria; k__norank_d__Bacteria; p__Proteobacteria; c__Alphaproteobacteria; o__Rhizobiales; f__unclassified_o__Rhizobiales; g__unclassified_o__Rhizobiales	57	45	93	42	47	49
d__Bacteria; k__norank_d__Bacteria; p__Bacteroidota; c__Bacteroidia; o__Flavobacteriales; f__Flavobacteriaceae; g__Zeaxanthinibacter	58	21	57	37	68	91
d__Bacteria; k__norank_d__Bacteria; p__Proteobacteria; c__Alphaproteobacteria; o__Sphingomonadales; f__Sphingomonadaceae; g__Ellin6055	58	68	38	77	38	52
d__Bacteria; k__norank_d__Bacteria; p__Chloroflexi; c__Dehalococcoidia; o__SAR202_clade; f__norank_o__SAR202_clade; g__norank_f__norank_o__SAR202_clade	41	77	55	45	60	49
d__Bacteria; k__norank_d__Bacteria; p__Proteobacteria; c__Alphaproteobacteria; o__Reyranellales; f__Reyranellaceae; g__norank_f__Reyranellaceae	55	77	41	54	53	47
d__Bacteria; k__norank_d__Bacteria; p__Chloroflexi; c__Gitt-GS-136; o__norank_c__Gitt-GS-136; f__norank_o__norank_c__Gitt-GS-136; g__norank_f__norank_o__norank_c__Gitt-GS-136	31	76	58	69	50	40
d__Bacteria; k__norank_d__Bacteria; p__Proteobacteria; c__Alphaproteobacteria; o__Rhizobiales; f__Rhizobiales_Incertae_Sedis; g__Bauldia	44	50	54	56	53	66
d__Bacteria; k__norank_d__Bacteria; p__Proteobacteria; c__Alphaproteobacteria; o__Kiloniellales; f__Kiloniellaceae; g__Pelagibius	46	42	57	34	73	71
d__Bacteria; k__norank_d__Bacteria; p__Actinobacteriota; c__Actinobacteria; o__Streptosporangiales; f__Streptosporangiaceae; g__Nonomuraea	31	78	63	38	65	45
d__Bacteria; k__norank_d__Bacteria; p__Planctomycetota; c__Phycisphaerae; o__Phycisphaerales; f__Phycisphaeraceae; g__AKYG587	73	100	19	58	18	49
d__Bacteria; k__norank_d__Bacteria; p__Bacteroidota; c__Rhodothermia; o__Rhodothermales; f__Rhodothermaceae; g__norank_f__Rhodothermaceae	50	57	30	37	86	56
d__Bacteria; k__norank_d__Bacteria; p__Proteobacteria; c__Alphaproteobacteria; o__Rhizobiales; f__Beijerinckiaceae; g__Microvirga	35	83	40	59	62	37
d__Bacteria; k__norank_d__Bacteria; p__Myxococcota; c__Polyangia; o__Nannocystales; f__Nannocystaceae; g__Nannocystis	45	51	67	46	59	45
d__Bacteria; k__norank_d__Bacteria; p__Proteobacteria; c__Gammaproteobacteria; o__Diplorickettsiales; f__Diplorickettsiaceae; g__norank_f__Diplorickettsiaceae	36	37	85	96	25	32
d__Bacteria; k__norank_d__Bacteria; p__Gemmatimonadota; c__Longimicrobia; o__Longimicrobiales; f__Longimicrobiaceae; g__norank_f__Longimicrobiaceae	83	44	40	43	58	43
d__Bacteria; k__norank_d__Bacteria; p__Bacteroidota; c__Bacteroidia; o__Cytophagales; f__Cyclobacteriaceae; g__norank_f__Cyclobacteriaceae	28	26	38	48	56	113
d__Bacteria; k__norank_d__Bacteria; p__Firmicutes; c__Bacilli; o__Bacillales; f__Planococcaceae; g__Psychrobacillus	87	23	43	24	96	35
d__Bacteria; k__norank_d__Bacteria; p__Firmicutes; c__Limnochordia; o__Limnochordales; f__Limnochordaceae; g__norank_f__Limnochordaceae	44	23	25	62	26	122
d__Bacteria; k__norank_d__Bacteria; p__Proteobacteria; c__Gammaproteobacteria; o__Burkholderiales; f__Rhodocyclaceae; g__Azoarcus	35	54	40	91	56	22
d__Bacteria; k__norank_d__Bacteria; p__Proteobacteria; c__Alphaproteobacteria; o__Rhizobiales; f__Hyphomicrobiaceae; g__unclassified_f__Hyphomicrobiaceae	37	48	38	64	58	51
d__Bacteria; k__norank_d__Bacteria; p__Chloroflexi; c__Anaerolineae; o__Ardenticatenales; f__Ardenticatenaceae; g__norank_f__Ardenticatenaceae	68	90	26	36	41	33
d__Bacteria; k__norank_d__Bacteria; p__Acidobacteriota; c__Holophagae; o__Subgroup_7; f__norank_o__Subgroup_7; g__norank_f__norank_o__Subgroup_7	29	52	61	67	46	36
d__Bacteria; k__norank_d__Bacteria; p__Firmicutes; c__Bacilli; o__Paenibacillales; f__Paenibacillaceae; g__Cohnella	52	53	41	44	50	51
d__Bacteria; k__norank_d__Bacteria; p__Proteobacteria; c__Alphaproteobacteria; o__Rhizobiales; f__Methyloligellaceae; g__Methyloceanibacter	42	69	64	36	35	42
d__Bacteria; k__norank_d__Bacteria; p__Acidobacteriota; c__Blastocatellia; o__Blastocatellales; f__Blastocatellaceae; g__JGI_0001001-H03	40	29	46	70	45	58
d__Bacteria; k__norank_d__Bacteria; p__Chloroflexi; c__Chloroflexia; o__Chloroflexales; f__Roseiflexaceae; g__norank_f__Roseiflexaceae	33	39	66	83	46	21
d__Bacteria; k__norank_d__Bacteria; p__Planctomycetota; c__Planctomycetes; o__Gemmatales; f__Gemmataceae; g__norank_f__Gemmataceae	28	42	11	68	40	92
d__Bacteria; k__norank_d__Bacteria; p__Proteobacteria; c__Gammaproteobacteria; o__Burkholderiales; f__Alcaligenaceae; g__unclassified_f__Alcaligenaceae	85	17	56	30	50	42
d__Bacteria; k__norank_d__Bacteria; p__Chloroflexi; c__Anaerolineae; o__Caldilineales; f__Caldilineaceae; g__Litorilinea	40	58	32	60	49	35
d__Bacteria; k__norank_d__Bacteria; p__Proteobacteria; c__Alphaproteobacteria; o__Rhizobiales; f__Xanthobacteraceae; g__Pseudorhodoplanes	71	51	31	38	36	39
d__Bacteria; k__norank_d__Bacteria; p__Firmicutes; c__Bacilli; o__Paenibacillales; f__Paenibacillaceae; g__Thermobacillus	50	20	13	14	14	153
d__Bacteria; k__norank_d__Bacteria; p__Proteobacteria; c__Gammaproteobacteria; o__Burkholderiales; f__Nitrosomonadaceae; g__mle1-7	52	49	48	54	43	15
d__Bacteria; k__norank_d__Bacteria; p__Proteobacteria; c__Gammaproteobacteria; o__Burkholderiales; f__Nitrosomonadaceae; g__Nitrosomonas	53	42	18	104	25	14
d__Bacteria; k__norank_d__Bacteria; p__Proteobacteria; c__Gammaproteobacteria; o__EPR3968-O8a-Bc78; f__norank_o__EPR3968-O8a-Bc78; g__norank_f__norank_o__EPR3968-O8a-Bc78	67	22	32	37	57	38
d__Bacteria; k__norank_d__Bacteria; p__Planctomycetota; c__OM190; o__norank_c__OM190; f__norank_o__norank_c__OM190; g__norank_f__norank_o__norank_c__OM190	46	63	18	43	22	57
d__Bacteria; k__norank_d__Bacteria; p__Proteobacteria; c__Alphaproteobacteria; o__Rhizobiales; f__Rhizobiaceae; g__Allorhizobium-Neorhizobium-Pararhizobium-Rhizobium	62	35	53	43	30	25
d__Bacteria; k__norank_d__Bacteria; p__Actinobacteriota; c__Actinobacteria; o__Propionibacteriales; f__Nocardioidaceae; g__Nocardioides	39	39	31	32	49	51
d__Bacteria; k__norank_d__Bacteria; p__Verrucomicrobiota; c__Chlamydiae; o__Chlamydiales; f__Simkaniaceae; g__norank_f__Simkaniaceae	20	11	5	124	19	62
d__Bacteria; k__norank_d__Bacteria; p__Firmicutes; c__Bacilli; o__Bacillales; f__Planococcaceae; g__Solibacillus	39	25	87	17	38	33
d__Bacteria; k__norank_d__Bacteria; p__Planctomycetota; c__Phycisphaerae; o__Phycisphaerales; f__Phycisphaeraceae; g__Urania-1B-19_marine_sediment_group	27	58	18	55	19	58
d__Bacteria; k__norank_d__Bacteria; p__Actinobacteriota; c__Acidimicrobiia; o__Microtrichales; f__Ilumatobacteraceae; g__norank_f__Ilumatobacteraceae	72	41	22	23	35	40
d__Bacteria; k__norank_d__Bacteria; p__Actinobacteriota; c__Thermoleophilia; o__Solirubrobacterales; f__Solirubrobacteraceae; g__Solirubrobacter	42	38	42	42	31	37
d__Bacteria; k__norank_d__Bacteria; p__Proteobacteria; c__Gammaproteobacteria; o__Xanthomonadales; f__Rhodanobacteraceae; g__norank_f__Rhodanobacteraceae	54	45	45	14	42	30
d__Bacteria; k__norank_d__Bacteria; p__Proteobacteria; c__Gammaproteobacteria; o__norank_c__Gammaproteobacteria; f__norank_o__norank_c__Gammaproteobacteria; g__norank_f__norank_o__norank_c__Gammaproteobacteria	20	23	21	34	65	63
d__Bacteria; k__norank_d__Bacteria; p__Proteobacteria; c__Gammaproteobacteria; o__Xanthomonadales; f__Xanthomonadaceae; g__Arenimonas	63	61	27	6	36	33
d__Bacteria; k__norank_d__Bacteria; p__Actinobacteriota; c__Actinobacteria; o__Micrococcales; f__Micrococcaceae; g__Paenarthrobacter	36	41	20	15	72	40
d__Bacteria; k__norank_d__Bacteria; p__Proteobacteria; c__Alphaproteobacteria; o__Rhizobiales; f__Xanthobacteraceae; g__Bradyrhizobium	72	38	27	54	21	10
d__Bacteria; k__norank_d__Bacteria; p__Firmicutes; c__Bacilli; o__Bacillales; f__Bacillaceae; g__Oceanobacillus	23	21	57	54	32	32
d__Bacteria; k__norank_d__Bacteria; p__Actinobacteriota; c__Actinobacteria; o__Propionibacteriales; f__Nocardioidaceae; g__Marmoricola	19	51	30	34	57	25
d__Bacteria; k__norank_d__Bacteria; p__Proteobacteria; c__Gammaproteobacteria; o__Burkholderiales; f__SC-I-84; g__norank_f__SC-I-84	28	30	57	45	34	17
d__Bacteria; k__norank_d__Bacteria; p__Firmicutes; c__Clostridia; o__Thermincolales; f__Thermincolaceae; g__Thermincola	19	42	38	43	40	28
d__Bacteria; k__norank_d__Bacteria; p__Firmicutes; c__Clostridia; o__Oscillospirales; f__Ruminococcaceae; g__Ruminococcus	14	73	33	55	22	11
d__Bacteria; k__norank_d__Bacteria; p__Proteobacteria; c__Gammaproteobacteria; o__Gammaproteobacteria_Incertae_Sedis; f__unclassified_o__Gammaproteobacteria_Incertae_Sedis; g__Candidatus_Berkiella	7	6	41	68	36	50
d__Bacteria; k__norank_d__Bacteria; p__Acidobacteriota; c__Subgroup_25; o__norank_c__Subgroup_25; f__norank_o__norank_c__Subgroup_25; g__norank_f__norank_o__norank_c__Subgroup_25	22	43	71	26	23	18
d__Bacteria; k__norank_d__Bacteria; p__Actinobacteriota; c__Actinobacteria; o__Micromonosporales; f__Micromonosporaceae; g__Luedemannella	66	34	18	16	45	22
d__Bacteria; k__norank_d__Bacteria; p__Acidobacteriota; c__Acidobacteriae; o__Solibacterales; f__Solibacteraceae; g__Candidatus_Solibacter	24	37	26	46	49	19
d__Bacteria; k__norank_d__Bacteria; p__Deinococcota; c__Deinococci; o__Deinococcales; f__Trueperaceae; g__Truepera	42	44	13	12	47	42
d__Bacteria; k__norank_d__Bacteria; p__Firmicutes; c__Bacilli; o__Bacillales; f__Bacillaceae; g__Fictibacillus	11	31	32	53	46	27
d__Bacteria; k__norank_d__Bacteria; p__Firmicutes; c__Symbiobacteriia; o__Symbiobacteriales; f__Symbiobacteraceae; g__norank_f__Symbiobacteraceae	21	32	22	25	80	18
d__Bacteria; k__norank_d__Bacteria; p__Actinobacteriota; c__Actinobacteria; o__Micrococcales; f__Intrasporangiaceae; g__unclassified_f__Intrasporangiaceae	38	38	27	30	41	23
d__Bacteria; k__norank_d__Bacteria; p__Firmicutes; c__Clostridia; o__Peptostreptococcales-Tissierellales; f__Peptostreptococcaceae; g__Sporacetigenium	21	35	17	39	43	40
d__Bacteria; k__norank_d__Bacteria; p__Acidobacteriota; c__Blastocatellia; o__Blastocatellales; f__Blastocatellaceae; g__Blastocatella	52	36	15	21	33	38
d__Bacteria; k__norank_d__Bacteria; p__Verrucomicrobiota; c__Chlamydiae; o__Chlamydiales; f__Waddliaceae; g__Waddlia	17	23	4	42	27	82
d__Bacteria; k__norank_d__Bacteria; p__Acidobacteriota; c__Subgroup_22; o__norank_c__Subgroup_22; f__norank_o__norank_c__Subgroup_22; g__norank_f__norank_o__norank_c__Subgroup_22	10	36	60	51	25	13
d__Bacteria; k__norank_d__Bacteria; p__Myxococcota; c__Polyangia; o__Polyangiales; f__Sandaracinaceae; g__norank_f__Sandaracinaceae	25	33	29	43	37	24
d__Bacteria; k__norank_d__Bacteria; p__Acidobacteriota; c__Subgroup_21; o__norank_c__Subgroup_21; f__norank_o__norank_c__Subgroup_21; g__norank_f__norank_o__norank_c__Subgroup_21	7	25	58	41	25	31
d__Bacteria; k__norank_d__Bacteria; p__Proteobacteria; c__Gammaproteobacteria; o__KI89A_clade; f__norank_o__KI89A_clade; g__norank_f__norank_o__KI89A_clade	24	35	38	34	32	24
d__Bacteria; k__norank_d__Bacteria; p__Verrucomicrobiota; c__Verrucomicrobiae; o__Chthoniobacterales; f__Xiphinematobacteraceae; g__Candidatus_Xiphinematobacter	23	28	22	32	25	56
d__Bacteria; k__norank_d__Bacteria; p__Myxococcota; c__Polyangia; o__Nannocystales; f__Nannocystaceae; g__unclassified_f__Nannocystaceae	30	42	42	28	24	20
d__Bacteria; k__norank_d__Bacteria; p__Firmicutes; c__Bacilli; o__Bacillales; f__Bacillaceae; g__norank_f__Bacillaceae	19	12	65	24	33	31
d__Bacteria; k__norank_d__Bacteria; p__Firmicutes; c__Clostridia; o__Peptostreptococcales-Tissierellales; f__norank_o__Peptostreptococcales-Tissierellales; g__Alkaliphilus	37	19	15	48	29	33
d__Bacteria; k__norank_d__Bacteria; p__Bacteroidota; c__Bacteroidia; o__Flavobacteriales; f__Flavobacteriaceae; g__Flavobacterium	26	7	119	2	22	2
d__Bacteria; k__norank_d__Bacteria; p__Myxococcota; c__Polyangia; o__Blfdi19; f__norank_o__Blfdi19; g__norank_f__norank_o__Blfdi19	46	17	31	44	10	29
d__Bacteria; k__norank_d__Bacteria; p__Proteobacteria; c__Alphaproteobacteria; o__Rhizobiales; f__Rhizobiaceae; g__Rhizobium_sphaerophysae_group	33	30	27	2	25	60
d__Bacteria; k__norank_d__Bacteria; p__Patescibacteria; c__Dojkabacteria; o__norank_c__Dojkabacteria; f__norank_o__norank_c__Dojkabacteria; g__norank_f__norank_o__norank_c__Dojkabacteria	44	26	6	17	28	55
d__Bacteria; k__norank_d__Bacteria; p__Chloroflexi; c__Chloroflexia; o__Thermomicrobiales; f__unclassified_o__Thermomicrobiales; g__unclassified_o__Thermomicrobiales	17	45	41	29	26	13
d__Bacteria; k__norank_d__Bacteria; p__Fibrobacterota; c__Fibrobacteria; o__Fibrobacterales; f__norank_o__Fibrobacterales; g__BBMC-4	19	2	10	15	124	1
d__Bacteria; k__norank_d__Bacteria; p__Actinobacteriota; c__Rubrobacteria; o__Rubrobacterales; f__Rubrobacteriaceae; g__Rubrobacter	9	46	33	31	24	26
d__Bacteria; k__norank_d__Bacteria; p__Verrucomicrobiota; c__Verrucomicrobiae; o__Chthoniobacterales; f__Chthoniobacteraceae; g__Chthoniobacter	48	27	14	20	14	46
d__Bacteria; k__norank_d__Bacteria; p__Proteobacteria; c__Alphaproteobacteria; o__Sphingomonadales; f__Sphingomonadaceae; g__unclassified_f__Sphingomonadaceae	36	32	21	20	35	23
d__Bacteria; k__norank_d__Bacteria; p__Firmicutes; c__Limnochordia; o__norank_c__Limnochordia; f__norank_o__norank_c__Limnochordia; g__Hydrogenispora	36	18	33	10	44	25
d__Bacteria; k__norank_d__Bacteria; p__Myxococcota; c__Myxococcia; o__Myxococcales; f__Myxococcaceae; g__Archangium	47	17	19	15	45	23
d__Bacteria; k__norank_d__Bacteria; p__Cyanobacteria; c__Sericytochromatia; o__norank_c__Sericytochromatia; f__norank_o__norank_c__Sericytochromatia; g__norank_f__norank_o__norank_c__Sericytochromatia	24	53	14	18	31	26
d__Bacteria; k__norank_d__Bacteria; p__Proteobacteria; c__Alphaproteobacteria; o__Sphingomonadales; f__Sphingomonadaceae; g__Altererythrobacter	44	20	25	19	25	29
d__Bacteria; k__norank_d__Bacteria; p__Proteobacteria; c__Gammaproteobacteria; o__Burkholderiales; f__Burkholderiaceae; g__Lautropia	67	35	4	6	19	30
d__Bacteria; k__norank_d__Bacteria; p__Methylomirabilota; c__Methylomirabilia; o__Rokubacteriales; f__WX65; g__norank_f__WX65	16	24	53	28	23	17
d__Bacteria; k__norank_d__Bacteria; p__Actinobacteriota; c__Actinobacteria; o__Micrococcales; f__Promicromonosporaceae; g__Cellulosimicrobium	13	14	15	12	75	32
d__Bacteria; k__norank_d__Bacteria; p__Planctomycetota; c__Phycisphaerae; o__Phycisphaerales; f__Phycisphaeraceae; g__SM1A02	30	41	16	22	20	31
d__Bacteria; k__norank_d__Bacteria; p__Firmicutes; c__Bacilli; o__Paenibacillales; f__Paenibacillaceae; g__Ammoniphilus	27	41	21	32	21	16
d__Bacteria; k__norank_d__Bacteria; p__Bacteroidota; c__SJA-28; o__norank_c__SJA-28; f__norank_o__norank_c__SJA-28; g__norank_f__norank_o__norank_c__SJA-28	44	23	36	30	14	11
d__Bacteria; k__norank_d__Bacteria; p__Proteobacteria; c__Alphaproteobacteria; o__Rhodobacterales; f__Rhodobacteraceae; g__Limibaculum	27	31	13	32	30	25
d__Bacteria; k__norank_d__Bacteria; p__Verrucomicrobiota; c__Chlamydiae; o__Chlamydiales; f__unclassified_o__Chlamydiales; g__unclassified_o__Chlamydiales	18	11	6	37	18	66
d__Bacteria; k__norank_d__Bacteria; p__Verrucomicrobiota; c__Chlamydiae; o__Chlamydiales; f__Parachlamydiaceae; g__unclassified_f__Parachlamydiaceae	16	23	6	34	13	62
d__Bacteria; k__norank_d__Bacteria; p__Proteobacteria; c__Gammaproteobacteria; o__Xanthomonadales; f__Xanthomonadaceae; g__Pseudoxanthomonas	31	43	24	17	32	7
d__Bacteria; k__norank_d__Bacteria; p__Bacteroidota; c__Bacteroidia; o__Chitinophagales; f__Chitinophagaceae; g__Niastella	35	32	30	28	12	17
d__Bacteria; k__norank_d__Bacteria; p__Actinobacteriota; c__Acidimicrobiia; o__Microtrichales; f__Iamiaceae; g__Iamia	29	19	20	35	24	27
d__Bacteria; k__norank_d__Bacteria; p__Chloroflexi; c__Chloroflexia; o__Thermomicrobiales; f__Thermomicrobiaceae; g__Nitrolancea	18	39	19	28	29	21
d__Bacteria; k__norank_d__Bacteria; p__Firmicutes; c__Bacilli; o__Bacillales; f__Bacillaceae; g__Pseudogracilibacillus	15	30	22	34	22	31
d__Bacteria; k__norank_d__Bacteria; p__Patescibacteria; c__Saccharimonadia; o__Saccharimonadales; f__norank_o__Saccharimonadales; g__norank_f__norank_o__Saccharimonadales	34	41	16	8	40	14
d__Bacteria; k__norank_d__Bacteria; p__Proteobacteria; c__Gammaproteobacteria; o__Burkholderiales; f__B1-7BS; g__norank_f__B1-7BS	25	15	14	68	27	3
d__Bacteria; k__norank_d__Bacteria; p__Firmicutes; c__Bacilli; o__Brevibacillales; f__Brevibacillaceae; g__Brevibacillus	17	28	47	25	11	23
d__Bacteria; k__norank_d__Bacteria; p__Dadabacteria; c__Dadabacteriia; o__Dadabacteriales; f__norank_o__Dadabacteriales; g__norank_f__norank_o__Dadabacteriales	17	15	52	31	24	10
d__Bacteria; k__norank_d__Bacteria; p__Sumerlaeota; c__Sumerlaeia; o__Sumerlaeales; f__Sumerlaeaceae; g__Sumerlaea	48	12	2	19	28	38
d__Bacteria; k__norank_d__Bacteria; p__Proteobacteria; c__Gammaproteobacteria; o__Gammaproteobacteria_Incertae_Sedis; f__unclassified_o__Gammaproteobacteria_Incertae_Sedis; g__norank_f__unclassified	12	30	46	31	15	13
d__Bacteria; k__norank_d__Bacteria; p__Acidobacteriota; c__Vicinamibacteria; o__Subgroup_17; f__norank_o__Subgroup_17; g__norank_f__norank_o__Subgroup_17	20	23	36	52	11	5
d__Bacteria; k__norank_d__Bacteria; p__Myxococcota; c__Myxococcia; o__Myxococcales; f__Myxococcaceae; g__P3OB-42	42	34	12	18	20	20
d__Bacteria; k__norank_d__Bacteria; p__Firmicutes; c__Symbiobacteriia; o__Symbiobacteriales; f__Symbiobacteraceae; g__Symbiobacterium	36	10	4	10	13	70
d__Bacteria; k__norank_d__Bacteria; p__Firmicutes; c__Bacilli; o__Bacillales; f__Bacillaceae; g__Ureibacillus	39	20	5	14	17	48
d__Bacteria; k__norank_d__Bacteria; p__Firmicutes; c__Clostridia; o__Peptostreptococcales-Tissierellales; f__norank_o__Peptostreptococcales-Tissierellales; g__Tissierella	20	15	20	29	28	29
d__Bacteria; k__norank_d__Bacteria; p__Cyanobacteria; c__Cyanobacteriia; o__Oxyphotobacteria_Incertae_Sedis; f__unclassified_o__Oxyphotobacteria_Incertae_Sedis; g__unclassified_o__Oxyphotobacteria_Incertae_Sedis	1	20	15	31	38	34
d__Bacteria; k__norank_d__Bacteria; p__Patescibacteria; c__Saccharimonadia; o__Saccharimonadales; f__S32; g__TM7	46	19	14	11	25	23
d__Bacteria; k__norank_d__Bacteria; p__Proteobacteria; c__Gammaproteobacteria; o__Legionellales; f__Legionellaceae; g__Legionella	7	19	25	12	42	33
d__Bacteria; k__norank_d__Bacteria; p__Gemmatimonadota; c__Gemmatimonadetes; o__Gemmatimonadales; f__Gemmatimonadaceae; g__Gemmatimonas	57	10	14	6	39	11
d__Bacteria; k__norank_d__Bacteria; p__Proteobacteria; c__Gammaproteobacteria; o__Cellvibrionales; f__Microbulbiferaceae; g__Microbulbifer	20	8	41	1	26	41
d__Bacteria; k__norank_d__Bacteria; p__Dependentiae; c__Babeliae; o__Babeliales; f__unclassified_o__Babeliales; g__unclassified_o__Babeliales	17	14	30	19	19	37
d__Bacteria; k__norank_d__Bacteria; p__Acidobacteriota; c__Blastocatellia; o__DS-100; f__norank_o__DS-100; g__norank_f__norank_o__DS-100	18	25	36	30	8	18
d__Bacteria; k__norank_d__Bacteria; p__Proteobacteria; c__Gammaproteobacteria; o__Burkholderiales; f__Nitrosomonadaceae; g__Ellin6067	9	38	27	42	14	4
d__Bacteria; k__norank_d__Bacteria; p__Bacteroidota; c__Bacteroidia; o__Cytophagales; f__Hymenobacteraceae; g__Pontibacter	9	19	32	23	29	20
d__Bacteria; k__norank_d__Bacteria; p__Firmicutes; c__Bacilli; o__Bacillales; f__Bacillaceae; g__Halobacillus	19	21	15	24	44	8
d__Bacteria; k__norank_d__Bacteria; p__Bacteroidota; c__Bacteroidia; o__Sphingobacteriales; f__Sphingobacteriaceae; g__Pedobacter	6	21	27	21	39	17
d__Bacteria; k__norank_d__Bacteria; p__Bdellovibrionota; c__Bdellovibrionia; o__Bdellovibrionales; f__Bdellovibrionaceae; g__Bdellovibrio	25	18	15	19	30	23
d__Bacteria; k__norank_d__Bacteria; p__Proteobacteria; c__Alphaproteobacteria; o__Sphingomonadales; f__Sphingomonadaceae; g__Sphingopyxis	19	18	28	14	26	25
d__Bacteria; k__norank_d__Bacteria; p__Chloroflexi; c__Anaerolineae; o__Anaerolineales; f__Anaerolineaceae; g__Anaerolinea	96	9	2	14	2	5
d__Bacteria; k__norank_d__Bacteria; p__Proteobacteria; c__Alphaproteobacteria; o__Sphingomonadales; f__Sphingomonadaceae; g__Erythrobacter	11	22	16	5	28	46
d__Bacteria; k__norank_d__Bacteria; p__Proteobacteria; c__Gammaproteobacteria; o__Cellvibrionales; f__Cellvibrionaceae; g__Cellvibrio	38	11	22	9	3	44
d__Bacteria; k__norank_d__Bacteria; p__Verrucomicrobiota; c__Verrucomicrobiae; o__Verrucomicrobiales; f__Rubritaleaceae; g__Luteolibacter	19	43	5	10	18	32
d__Bacteria; k__norank_d__Bacteria; p__Firmicutes; c__Bacilli; o__Bacillales; f__Bacillaceae; g__Gracilibacillus	23	14	14	20	36	20
d__Bacteria; k__norank_d__Bacteria; p__Firmicutes; c__Clostridia; o__Lachnospirales; f__Lachnospiraceae; g__unclassified_f__Lachnospiraceae	19	29	9	33	17	18
d__Bacteria; k__norank_d__Bacteria; p__Actinobacteriota; c__Actinobacteria; o__Streptosporangiales; f__Thermomonosporaceae; g__Thermobispora	63	8	5	8	5	33
d__Bacteria; k__norank_d__Bacteria; p__Proteobacteria; c__Alphaproteobacteria; o__Rhizobiales; f__norank_o__Rhizobiales; g__norank_f__norank_o__Rhizobiales	20	36	19	15	20	12
d__Bacteria; k__norank_d__Bacteria; p__Halanaerobiaeota; c__Halanaerobiia; o__Halanaerobiales; f__Halanaerobiaceae; g__Halocella	18	2	6	12	81	2
d__Bacteria; k__norank_d__Bacteria; p__Patescibacteria; c__Saccharimonadia; o__Saccharimonadales; f__LWQ8; g__norank_f__LWQ8	35	13	12	4	28	28
d__Bacteria; k__norank_d__Bacteria; p__Actinobacteriota; c__Actinobacteria; o__Streptosporangiales; f__Streptosporangiaceae; g__Thermopolyspora	72	5	4	3	6	30
d__Bacteria; k__norank_d__Bacteria; p__Proteobacteria; c__Alphaproteobacteria; o__Tistrellales; f__Geminicoccaceae; g__Candidatus_Alysiosphaera	10	22	21	17	31	19
d__Bacteria; k__norank_d__Bacteria; p__Bdellovibrionota; c__Bdellovibrionia; o__Bdellovibrionales; f__Bdellovibrionaceae; g__OM27_clade	18	21	28	22	10	20
d__Bacteria; k__norank_d__Bacteria; p__Firmicutes; c__Clostridia; o__Peptostreptococcales-Tissierellales; f__norank_o__Peptostreptococcales-Tissierellales; g__Tepidimicrobium	10	28	16	24	23	18
d__Bacteria; k__norank_d__Bacteria; p__Actinobacteriota; c__Actinobacteria; o__Pseudonocardiales; f__Pseudonocardiaceae; g__Saccharomonospora	12	17	19	24	30	16
d__Bacteria; k__norank_d__Bacteria; p__Proteobacteria; c__Alphaproteobacteria; o__Kiloniellales; f__Fodinicurvataceae; g__norank_f__Fodinicurvataceae	33	13	18	23	16	13
d__Bacteria; k__norank_d__Bacteria; p__Actinobacteriota; c__Actinobacteria; o__Propionibacteriales; f__Nocardioidaceae; g__Aeromicrobium	21	31	12	10	25	16
d__Bacteria; k__norank_d__Bacteria; p__Proteobacteria; c__Gammaproteobacteria; o__Xanthomonadales; f__Xanthomonadaceae; g__Luteimonas	29	11	6	2	54	11
d__Bacteria; k__norank_d__Bacteria; p__Myxococcota; c__Polyangia; o__Polyangiales; f__Polyangiaceae; g__Pajaroellobacter	26	18	14	15	20	19
d__Bacteria; k__norank_d__Bacteria; p__Myxococcota; c__Myxococcia; o__Myxococcales; f__Myxococcaceae; g__Myxococcus	46	29	3	9	4	19
d__Bacteria; k__norank_d__Bacteria; p__Bacteroidota; c__Bacteroidia; o__Cytophagales; f__Cytophagaceae; g__Sporocytophaga	23	9	8	26	18	25
d__Bacteria; k__norank_d__Bacteria; p__Firmicutes; c__Bacilli; o__Bacillales; f__Bacillaceae; g__Virgibacillus	9	35	24	3	25	13
d__Bacteria; k__norank_d__Bacteria; p__Acidobacteriota; c__Acidobacteriae; o__Acidobacteriales; f__norank_o__Acidobacteriales; g__norank_f__norank_o__Acidobacteriales	18	17	8	13	17	36
d__Bacteria; k__norank_d__Bacteria; p__Firmicutes; c__Bacilli; o__Aneurinibacillales; f__Aneurinibacillaceae; g__Aneurinibacillus	3	29	23	22	11	20
d__Bacteria; k__norank_d__Bacteria; p__Actinobacteriota; c__Thermoleophilia; o__norank_c__Thermoleophilia; f__norank_o__norank_c__Thermoleophilia; g__norank_f__norank_o__norank_c__Thermoleophilia	11	23	24	25	12	13
d__Bacteria; k__norank_d__Bacteria; p__Proteobacteria; c__Gammaproteobacteria; o__Burkholderiales; f__Rhodocyclaceae; g__Thauera	6	29	17	37	10	8
d__Bacteria; k__norank_d__Bacteria; p__Planctomycetota; c__Phycisphaerae; o__Tepidisphaerales; f__WD2101_soil_group; g__norank_f__WD2101_soil_group	13	24	18	14	18	20
d__Bacteria; k__norank_d__Bacteria; p__Chloroflexi; c__Anaerolineae; o__unclassified_c__Anaerolineae; f__unclassified_c__Anaerolineae; g__unclassified_c__Anaerolineae	21	13	14	17	11	28
d__Bacteria; k__norank_d__Bacteria; p__Bacteroidota; c__Bacteroidia; o__Flavobacteriales; f__Flavobacteriaceae; g__Arenibacter	19	17	21	6	15	25
d__Bacteria; k__norank_d__Bacteria; p__Proteobacteria; c__Gammaproteobacteria; o__Salinisphaerales; f__Solimonadaceae; g__norank_f__Solimonadaceae	5	28	21	29	10	10
d__Bacteria; k__norank_d__Bacteria; p__Bacteroidota; c__Bacteroidia; o__Cytophagales; f__Spirosomaceae; g__Dyadobacter	31	10	38	3	21	0
d__Bacteria; k__norank_d__Bacteria; p__Bdellovibrionota; c__Oligoflexia; o__0319-6G20; f__norank_o__0319-6G20; g__norank_f__norank_o__0319-6G20	27	16	9	10	21	19
d__Bacteria; k__norank_d__Bacteria; p__Proteobacteria; c__Gammaproteobacteria; o__Coxiellales; f__Coxiellaceae; g__Coxiella	15	13	20	23	9	22
d__Bacteria; k__norank_d__Bacteria; p__Bacteroidota; c__Bacteroidia; o__Chitinophagales; f__37-13; g__norank_f__37-13	7	8	20	25	19	22
d__Bacteria; k__norank_d__Bacteria; p__Firmicutes; c__Bacilli; o__Bacillales; f__Bacillaceae; g__Cerasibacillus	17	23	16	23	11	10
d__Bacteria; k__norank_d__Bacteria; p__Firmicutes; c__Bacilli; o__Thermoactinomycetales; f__Thermoactinomycetaceae; g__Baia	17	27	20	17	11	8
d__Bacteria; k__norank_d__Bacteria; p__Chloroflexi; c__unclassified_p__Chloroflexi; o__unclassified_p__Chloroflexi; f__unclassified_p__Chloroflexi; g__unclassified_p__Chloroflexi	7	17	18	22	17	18
d__Bacteria; k__norank_d__Bacteria; p__Acidobacteriota; c__Vicinamibacteria; o__Vicinamibacterales; f__Vicinamibacteraceae; g__Luteitalea	11	9	14	20	21	24
d__Bacteria; k__norank_d__Bacteria; p__Chloroflexi; c__Anaerolineae; o__RBG-13-54-9; f__norank_o__RBG-13-54-9; g__norank_f__norank_o__RBG-13-54-9	20	20	7	18	26	7
d__Bacteria; k__norank_d__Bacteria; p__Proteobacteria; c__Alphaproteobacteria; o__Holosporales; f__Holosporaceae; g__norank_f__Holosporaceae	26	4	6	18	32	12
d__Bacteria; k__norank_d__Bacteria; p__Firmicutes; c__Clostridia; o__norank_c__Clostridia; f__Hungateiclostridiaceae; g__unclassified_f__Hungateiclostridiaceae	13	13	10	16	25	21
d__Bacteria; k__norank_d__Bacteria; p__Actinobacteriota; c__Actinobacteria; o__Micrococcales; f__Intrasporangiaceae; g__Ornithinicoccus	39	18	4	7	15	15
d__Bacteria; k__norank_d__Bacteria; p__Firmicutes; c__Bacilli; o__Thermoactinomycetales; f__Thermoactinomycetaceae; g__norank_f__Thermoactinomycetaceae	10	7	3	6	4	66
d__Bacteria; k__norank_d__Bacteria; p__Actinobacteriota; c__Actinobacteria; o__Frankiales; f__Geodermatophilaceae; g__Blastococcus	8	20	25	14	16	12
d__Bacteria; k__norank_d__Bacteria; p__Planctomycetota; c__Planctomycetes; o__norank_c__Planctomycetes; f__norank_o__norank_c__Planctomycetes; g__norank_f__norank_o__norank_c__Planctomycetes	18	22	2	17	14	21
d__Bacteria; k__norank_d__Bacteria; p__Planctomycetota; c__Phycisphaerae; o__Phycisphaerales; f__Phycisphaeraceae; g__norank_f__Phycisphaeraceae	24	29	1	10	12	18
d__Bacteria; k__norank_d__Bacteria; p__Actinobacteriota; c__Acidimicrobiia; o__norank_c__Acidimicrobiia; f__norank_o__norank_c__Acidimicrobiia; g__norank_f__norank_o__norank_c__Acidimicrobiia	5	31	20	15	10	12
d__Bacteria; k__norank_d__Bacteria; p__Proteobacteria; c__Gammaproteobacteria; o__Burkholderiales; f__Methylophilaceae; g__UBA6140	34	18	11	3	11	14
d__Bacteria; k__norank_d__Bacteria; p__Acidobacteriota; c__Acidobacteriae; o__Subgroup_2; f__norank_o__Subgroup_2; g__norank_f__norank_o__Subgroup_2	4	27	23	14	11	12
d__Bacteria; k__norank_d__Bacteria; p__Proteobacteria; c__Gammaproteobacteria; o__Burkholderiales; f__norank_o__Burkholderiales; g__norank_f__norank_o__Burkholderiales	11	14	31	22	12	1
d__Bacteria; k__norank_d__Bacteria; p__Cyanobacteria; c__Cyanobacteriia; o__Cyanobacteriales; f__Nostocaceae; g__Scytonema_UTEX_2349	7	7	7	18	33	18
d__Bacteria; k__norank_d__Bacteria; p__Actinobacteriota; c__Actinobacteria; o__Corynebacteriales; f__Nocardiaceae; g__Rhodococcus	7	4	9	8	26	35
d__Bacteria; k__norank_d__Bacteria; p__Actinobacteriota; c__Actinobacteria; o__Pseudonocardiales; f__Pseudonocardiaceae; g__Pseudonocardia	9	18	18	11	17	15
d__Bacteria; k__norank_d__Bacteria; p__Actinobacteriota; c__Actinobacteria; o__0319-7L14; f__norank_o__0319-7L14; g__norank_f__norank_o__0319-7L14	25	16	9	4	19	14
d__Bacteria; k__norank_d__Bacteria; p__Verrucomicrobiota; c__Verrucomicrobiae; o__Opitutales; f__Opitutaceae; g__Opitutus	22	25	3	10	12	14
d__Bacteria; k__norank_d__Bacteria; p__Patescibacteria; c__Saccharimonadia; o__Saccharimonadales; f__Saccharimonadaceae; g__TM7a	20	0	4	0	62	0
d__Bacteria; k__norank_d__Bacteria; p__Firmicutes; c__Bacilli; o__Bacillales; f__Sporolactobacillaceae; g__Tuberibacillus	24	2	1	4	4	51
d__Bacteria; k__norank_d__Bacteria; p__Proteobacteria; c__Gammaproteobacteria; o__Methylococcales; f__Methylomonadaceae; g__Methylobacter	15	14	6	25	16	9
d__Bacteria; k__norank_d__Bacteria; p__Planctomycetota; c__Phycisphaerae; o__Tepidisphaerales; f__norank_o__Tepidisphaerales; g__norank_f__norank_o__Tepidisphaerales	20	20	3	11	19	11
d__Bacteria; k__norank_d__Bacteria; p__Firmicutes; c__Clostridia; o__Clostridiales; f__Clostridiaceae; g__Clostridium_sensu_stricto_8	13	23	13	11	15	9
d__Bacteria; k__norank_d__Bacteria; p__Proteobacteria; c__Alphaproteobacteria; o__Rhizobiales; f__Hyphomicrobiaceae; g__Filomicrobium	11	23	7	16	7	20
d__Bacteria; k__norank_d__Bacteria; p__Latescibacterota; c__Latescibacteria; o__Latescibacterales; f__Latescibacteraceae; g__norank_f__Latescibacteraceae	2	12	30	21	3	15
d__Bacteria; k__norank_d__Bacteria; p__Verrucomicrobiota; c__Verrucomicrobiae; o__Opitutales; f__Puniceicoccaceae; g__Verruc-01	50	12	1	5	3	11
d__Bacteria; k__norank_d__Bacteria; p__Firmicutes; c__Clostridia; o__Lachnospirales; f__Lachnospiraceae; g__norank_f__Lachnospiraceae	1	20	13	28	9	10
d__Bacteria; k__norank_d__Bacteria; p__Proteobacteria; c__Alphaproteobacteria; o__Rickettsiales; f__SM2D12; g__norank_f__SM2D12	25	12	12	8	3	20
d__Bacteria; k__norank_d__Bacteria; p__Elusimicrobiota; c__Lineage_IIb; o__norank_c__Lineage_IIb; f__norank_o__norank_c__Lineage_IIb; g__norank_f__norank_o__norank_c__Lineage_IIb	4	14	15	11	16	20
d__Bacteria; k__norank_d__Bacteria; p__Acidobacteriota; c__Subgroup_11; o__norank_c__Subgroup_11; f__norank_o__norank_c__Subgroup_11; g__norank_f__norank_o__norank_c__Subgroup_11	13	14	20	24	4	5
d__Bacteria; k__norank_d__Bacteria; p__Proteobacteria; c__Alphaproteobacteria; o__Micavibrionales; f__norank_o__Micavibrionales; g__norank_f__norank_o__Micavibrionales	21	8	8	2	6	34
d__Bacteria; k__norank_d__Bacteria; p__Actinobacteriota; c__Actinobacteria; o__Streptosporangiales; f__Nocardiopsaceae; g__Thermobifida	25	12	4	11	4	23
d__Bacteria; k__norank_d__Bacteria; p__Bacteroidota; c__Bacteroidia; o__Cytophagales; f__Cyclobacteriaceae; g__unclassified_f__Cyclobacteriaceae	14	6	8	1	5	44
d__Bacteria; k__norank_d__Bacteria; p__Bdellovibrionota; c__Bdellovibrionia; o__Bacteriovoracales; f__Bacteriovoracaceae; g__Peredibacter	29	12	5	8	15	9
d__Bacteria; k__norank_d__Bacteria; p__Actinobacteriota; c__Actinobacteria; o__Frankiales; f__norank_o__Frankiales; g__norank_f__norank_o__Frankiales	15	14	7	18	5	18
d__Bacteria; k__norank_d__Bacteria; p__Proteobacteria; c__Gammaproteobacteria; o__Burkholderiales; f__Comamonadaceae; g__Acidovorax	8	2	61	0	4	2
d__Bacteria; k__norank_d__Bacteria; p__Proteobacteria; c__Gammaproteobacteria; o__Burkholderiales; f__Oxalobacteraceae; g__unclassified_f__Oxalobacteraceae	19	8	11	5	17	17
d__Bacteria; k__norank_d__Bacteria; p__Firmicutes; c__Clostridia; o__Lachnospirales; f__Lachnospiraceae; g__Lachnospiraceae_NK3A20_group	21	12	7	10	5	20
d__Bacteria; k__norank_d__Bacteria; p__Firmicutes; c__Bacilli; o__Thermoactinomycetales; f__Thermoactinomycetaceae; g__Laceyella	10	33	7	8	12	4
d__Bacteria; k__norank_d__Bacteria; p__Verrucomicrobiota; c__Chlamydiae; o__Chlamydiales; f__Parachlamydiaceae; g__Neochlamydia	4	6	4	35	7	16
d__Bacteria; k__norank_d__Bacteria; p__Actinobacteriota; c__Actinobacteria; o__Micromonosporales; f__Micromonosporaceae; g__Micromonospora	3	9	11	6	5	38
d__Bacteria; k__norank_d__Bacteria; p__Bacteroidota; c__Bacteroidia; o__Cytophagales; f__Cyclobacteriaceae; g__Algoriphagus	4	11	5	1	45	6
d__Bacteria; k__norank_d__Bacteria; p__Actinobacteriota; c__Actinobacteria; o__Nitriliruptorales; f__Nitriliruptoraceae; g__norank_f__Nitriliruptoraceae	4	11	2	14	20	21
d__Bacteria; k__norank_d__Bacteria; p__Bacteroidota; c__Bacteroidia; o__Cytophagales; f__Microscillaceae; g__Ohtaekwangia	35	17	5	8	5	1
d__Bacteria; k__norank_d__Bacteria; p__Methylomirabilota; c__Methylomirabilia; o__Methylomirabilales; f__Methylomirabilaceae; g__wb1-A12	1	3	57	4	5	1
d__Bacteria; k__norank_d__Bacteria; p__Actinobacteriota; c__Actinobacteria; o__Pseudonocardiales; f__Pseudonocardiaceae; g__Saccharopolyspora	6	10	12	16	5	21
d__Bacteria; k__norank_d__Bacteria; p__Firmicutes; c__Clostridia; o__Lachnospirales; f__Lachnospiraceae; g__Cellulosilyticum	32	7	5	2	5	19
d__Bacteria; k__norank_d__Bacteria; p__Dependentiae; c__Babeliae; o__Babeliales; f__norank_o__Babeliales; g__norank_f__norank_o__Babeliales	2	5	21	16	6	19
d__Bacteria; k__norank_d__Bacteria; p__Actinobacteriota; c__Actinobacteria; o__Micrococcales; f__Microbacteriaceae; g__Glaciibacter	7	4	7	19	12	17
d__Bacteria; k__norank_d__Bacteria; p__Verrucomicrobiota; c__Chlamydiae; o__Chlamydiales; f__Parachlamydiaceae; g__Candidatus_Protochlamydia	4	1	3	29	1	28
d__Bacteria; k__norank_d__Bacteria; p__Firmicutes; c__Clostridia; o__Clostridiales; f__Clostridiaceae; g__Clostridium_sensu_stricto_13	5	17	8	14	19	3
d__Bacteria; k__norank_d__Bacteria; p__Proteobacteria; c__Gammaproteobacteria; o__Methylococcales; f__Methylococcaceae; g__Methylocaldum	27	4	5	9	13	7
d__Bacteria; k__norank_d__Bacteria; p__Proteobacteria; c__Gammaproteobacteria; o__Burkholderiales; f__Oxalobacteraceae; g__Herbaspirillum	9	16	8	3	11	18
d__Bacteria; k__norank_d__Bacteria; p__Actinobacteriota; c__Actinobacteria; o__Streptosporangiales; f__Thermomonosporaceae; g__Actinomadura	2	11	20	11	16	5
d__Bacteria; k__norank_d__Bacteria; p__Cyanobacteria; c__Cyanobacteriia; o__Cyanobacteriales; f__Cyanobacteriales_Incertae_Sedis; g__Phormidium_SAG_81.79	2	9	2	14	37	0
d__Bacteria; k__norank_d__Bacteria; p__Firmicutes; c__Clostridia; o__Clostridiales; f__Caloramatoraceae; g__unclassified_f__Caloramatoraceae	6	11	2	7	23	15
d__Bacteria; k__norank_d__Bacteria; p__Proteobacteria; c__Gammaproteobacteria; o__Burkholderiales; f__Burkholderiaceae; g__Limnobacter	17	10	4	20	9	4
d__Bacteria; k__norank_d__Bacteria; p__Actinobacteriota; c__Actinobacteria; o__Micromonosporales; f__Micromonosporaceae; g__Longispora	7	4	20	16	5	12
d__Bacteria; k__norank_d__Bacteria; p__Proteobacteria; c__Gammaproteobacteria; o__Oceanospirillales; f__Pseudohongiellaceae; g__BIyi10	16	23	2	2	13	8
d__Bacteria; k__norank_d__Bacteria; p__Firmicutes; c__Clostridia; o__Peptostreptococcales-Tissierellales; f__Sedimentibacteraceae; g__Sedimentibacter	7	8	16	9	8	14
d__Bacteria; k__norank_d__Bacteria; p__Cyanobacteria; c__Cyanobacteriia; o__Cyanobacteriales; f__Coleofasciculaceae; g__Microcoleus_Es-Yyy1400	0	11	2	3	38	8
d__Bacteria; k__norank_d__Bacteria; p__Proteobacteria; c__Alphaproteobacteria; o__Caulobacterales; f__Parvularculaceae; g__Amphiplicatus	6	9	13	12	4	17
d__Bacteria; k__norank_d__Bacteria; p__Bacteroidota; c__Bacteroidia; o__Sphingobacteriales; f__S15-21; g__norank_f__S15-21	7	11	14	4	13	11
d__Bacteria; k__norank_d__Bacteria; p__Bacteroidota; c__Bacteroidia; o__Chitinophagales; f__Chitinophagaceae; g__Edaphobaculum	20	4	11	7	2	16
d__Bacteria; k__norank_d__Bacteria; p__Bacteroidota; c__Bacteroidia; o__Flavobacteriales; f__Flavobacteriaceae; g__Subsaxibacter	11	6	10	1	13	19
d__Bacteria; k__norank_d__Bacteria; p__Proteobacteria; c__Alphaproteobacteria; o__Rhizobiales; f__Kaistiaceae; g__Kaistia	5	7	9	5	8	25
d__Bacteria; k__norank_d__Bacteria; p__Bacteroidota; c__Bacteroidia; o__Flavobacteriales; f__Flavobacteriaceae; g__Hoppeia	5	6	17	12	7	11
d__Bacteria; k__norank_d__Bacteria; p__Firmicutes; c__Clostridia; o__Caldicoprobacterales; f__Caldicoprobacteraceae; g__Caldicoprobacter	2	4	8	10	23	11
d__Bacteria; k__norank_d__Bacteria; p__Firmicutes; c__Clostridia; o__Peptostreptococcales-Tissierellales; f__norank_o__Peptostreptococcales-Tissierellales; g__Anaerosalibacter	4	14	12	16	11	0
d__Bacteria; k__norank_d__Bacteria; p__Hydrogenedentes; c__Hydrogenedentia; o__Hydrogenedentiales; f__Hydrogenedensaceae; g__norank_f__Hydrogenedensaceae	8	11	2	12	9	15
d__Bacteria; k__norank_d__Bacteria; p__Firmicutes; c__Clostridia; o__norank_c__Clostridia; f__Hungateiclostridiaceae; g__Ruminiclostridium	8	10	8	17	9	5
d__Bacteria; k__norank_d__Bacteria; p__WS2; c__norank_p__WS2; o__norank_c__norank_p__WS2; f__norank_o__norank_c__norank_p__WS2; g__norank_f__norank_o__norank_c__norank_p__WS2	14	6	4	5	10	18
d__Bacteria; k__norank_d__Bacteria; p__Acidobacteriota; c__Acidobacteriae; o__Subgroup_15; f__norank_o__Subgroup_15; g__norank_f__norank_o__Subgroup_15	2	7	27	5	2	13
d__Bacteria; k__norank_d__Bacteria; p__Proteobacteria; c__Alphaproteobacteria; o__Rhizobiales; f__D05-2; g__norank_f__D05-2	8	10	4	11	15	8
d__Bacteria; k__norank_d__Bacteria; p__Actinobacteriota; c__Acidimicrobiia; o__Microtrichales; f__unclassified_o__Microtrichales; g__unclassified_o__Microtrichales	14	8	5	8	11	10
d__Bacteria; k__norank_d__Bacteria; p__Bacteroidota; c__Bacteroidia; o__Chitinophagales; f__Saprospiraceae; g__Phaeodactylibacter	7	5	15	17	8	3
d__Bacteria; k__norank_d__Bacteria; p__Bacteroidota; c__Bacteroidia; o__Chitinophagales; f__Chitinophagaceae; g__Flavisolibacter	8	1	10	3	30	2
d__Bacteria; k__norank_d__Bacteria; p__Proteobacteria; c__Alphaproteobacteria; o__Azospirillales; f__Azospirillaceae; g__norank_f__Azospirillaceae	6	9	14	11	10	4
d__Bacteria; k__norank_d__Bacteria; p__Myxococcota; c__Myxococcia; o__Myxococcales; f__Myxococcaceae; g__unclassified_f__Myxococcaceae	11	4	11	11	11	6
d__Bacteria; k__norank_d__Bacteria; p__Proteobacteria; c__Alphaproteobacteria; o__Sphingomonadales; f__Sphingomonadaceae; g__Novosphingobium	8	9	10	6	10	11
d__Bacteria; k__norank_d__Bacteria; p__Elusimicrobiota; c__Lineage_IIa; o__norank_c__Lineage_IIa; f__norank_o__norank_c__Lineage_IIa; g__norank_f__norank_o__norank_c__Lineage_IIa	4	10	13	6	9	11
d__Bacteria; k__norank_d__Bacteria; p__Bacteroidota; c__Bacteroidia; o__Flavobacteriales; f__Flavobacteriaceae; g__unclassified_f__Flavobacteriaceae	11	2	3	4	7	26
d__Bacteria; k__norank_d__Bacteria; p__Firmicutes; c__Bacilli; o__Paenibacillales; f__Paenibacillaceae; g__unclassified_f__Paenibacillaceae	14	11	8	4	7	8
d__Bacteria; k__norank_d__Bacteria; p__Verrucomicrobiota; c__Chlamydiae; o__Chlamydiales; f__cvE6; g__norank_f__cvE6	4	11	6	4	11	16
d__Bacteria; k__norank_d__Bacteria; p__Firmicutes; c__Thermacetogenia; o__Thermacetogeniales; f__Thermacetogeniaceae; g__Syntrophaceticus	5	9	17	12	1	8
d__Bacteria; k__norank_d__Bacteria; p__Actinobacteriota; c__Actinobacteria; o__Propionibacteriales; f__Nocardioidaceae; g__norank_f__Nocardioidaceae	5	1	2	0	1	43
d__Bacteria; k__norank_d__Bacteria; p__Bacteroidota; c__Bacteroidia; o__Chitinophagales; f__Chitinophagaceae; g__norank_f__Chitinophagaceae	0	12	13	26	0	0
d__Bacteria; k__norank_d__Bacteria; p__Verrucomicrobiota; c__Verrucomicrobiae; o__Verrucomicrobiales; f__DEV007; g__norank_f__DEV007	5	7	8	16	8	7
d__Bacteria; k__norank_d__Bacteria; p__Actinobacteriota; c__Actinobacteria; o__Micrococcales; f__Cellulomonadaceae; g__Actinotalea	26	2	2	2	9	10
d__Bacteria; k__norank_d__Bacteria; p__Desulfobacterota; c__Syntrophobacteria; o__Syntrophobacterales; f__Syntrophobacteraceae; g__Syntrophobacter	4	11	13	16	4	3
d__Bacteria; k__norank_d__Bacteria; p__Fibrobacterota; c__Fibrobacteria; o__Fibrobacterales; f__Fibrobacteraceae; g__possible_genus_04	14	9	6	4	7	11
d__Bacteria; k__norank_d__Bacteria; p__Proteobacteria; c__Gammaproteobacteria; o__Oceanospirillales; f__Halomonadaceae; g__Halomonas	13	2	3	2	9	22
d__Bacteria; k__norank_d__Bacteria; p__Proteobacteria; c__Gammaproteobacteria; o__Nitrosococcales; f__Methylophagaceae; g__Methylophaga	9	7	0	8	2	25
d__Bacteria; k__norank_d__Bacteria; p__Cyanobacteria; c__Cyanobacteriia; o__Cyanobacteriales; f__Nostocaceae; g__Nostoc_PCC-7107	3	14	1	4	12	16
d__Bacteria; k__norank_d__Bacteria; p__Proteobacteria; c__Alphaproteobacteria; o__Rhizobiales; f__KF-JG30-B3; g__norank_f__KF-JG30-B3	8	10	10	15	3	4
d__Bacteria; k__norank_d__Bacteria; p__Proteobacteria; c__Gammaproteobacteria; o__Burkholderiales; f__unclassified_o__Burkholderiales; g__unclassified_o__Burkholderiales	0	8	9	23	8	2
d__Bacteria; k__norank_d__Bacteria; p__Bacteroidota; c__Bacteroidia; o__Chitinophagales; f__Chitinophagaceae; g__Parasegetibacter	1	12	13	10	11	2
d__Bacteria; k__norank_d__Bacteria; p__Proteobacteria; c__Alphaproteobacteria; o__Defluviicoccales; f__norank_o__Defluviicoccales; g__norank_f__norank_o__Defluviicoccales	2	11	15	7	12	2
d__Bacteria; k__norank_d__Bacteria; p__Verrucomicrobiota; c__Verrucomicrobiae; o__Verrucomicrobiales; f__unclassified_o__Verrucomicrobiales; g__unclassified_o__Verrucomicrobiales	2	9	11	17	7	3
d__Bacteria; k__norank_d__Bacteria; p__Proteobacteria; c__Gammaproteobacteria; o__HOC36; f__norank_o__HOC36; g__norank_f__norank_o__HOC36	2	10	14	9	4	9
d__Bacteria; k__norank_d__Bacteria; p__Proteobacteria; c__Alphaproteobacteria; o__Sphingomonadales; f__Sphingomonadaceae; g__Sphingorhabdus	21	5	2	5	7	8
d__Bacteria; k__norank_d__Bacteria; p__Firmicutes; c__Bacilli; o__Bacillales; f__Bacillaceae; g__Thalassobacillus	3	11	0	3	5	26
d__Bacteria; k__norank_d__Bacteria; p__Chloroflexi; c__Chloroflexia; o__Chloroflexales; f__Chloroflexaceae; g__Candidatus_Chloroploca	14	3	13	13	2	2
d__Bacteria; k__norank_d__Bacteria; p__Proteobacteria; c__Gammaproteobacteria; o__Steroidobacterales; f__Woeseiaceae; g__unclassified_f__Woeseiaceae	7	14	1	13	4	8
d__Bacteria; k__norank_d__Bacteria; p__Proteobacteria; c__Gammaproteobacteria; o__Pseudomonadales; f__Moraxellaceae; g__Acinetobacter	3	7	10	1	21	4
d__Bacteria; k__norank_d__Bacteria; p__Proteobacteria; c__Alphaproteobacteria; o__Puniceispirillales; f__Puniceispirillales_Incertae_Sedis; g__Constrictibacter	13	5	6	8	8	6
d__Bacteria; k__norank_d__Bacteria; p__Firmicutes; c__Bacilli; o__Staphylococcales; f__Staphylococcaceae; g__Jeotgalicoccus	0	0	26	11	6	3
d__Bacteria; k__norank_d__Bacteria; p__Firmicutes; c__Desulfotomaculia; o__Desulfotomaculales; f__norank_o__Desulfotomaculales; g__Desulfotomaculum	7	3	10	22	2	1
d__Bacteria; k__norank_d__Bacteria; p__Bacteroidota; c__Bacteroidia; o__Chitinophagales; f__Chitinophagaceae; g__Taibaiella	23	1	5	7	1	8
d__Bacteria; k__norank_d__Bacteria; p__Proteobacteria; c__Alphaproteobacteria; o__Rickettsiales; f__Mitochondria; g__norank_f__Mitochondria	11	7	4	3	10	10
d__Bacteria; k__norank_d__Bacteria; p__Zixibacteria; c__norank_p__Zixibacteria; o__norank_c__norank_p__Zixibacteria; f__norank_o__norank_c__norank_p__Zixibacteria; g__norank_f__norank_o__norank_c__norank_p__Zixibacteria	0	5	27	8	3	2
d__Bacteria; k__norank_d__Bacteria; p__Proteobacteria; c__Alphaproteobacteria; o__Caulobacterales; f__Caulobacteraceae; g__Phenylobacterium	11	4	9	9	7	5
d__Bacteria; k__norank_d__Bacteria; p__Firmicutes; c__Clostridia; o__Clostridiales; f__Clostridiaceae; g__Clostridium_sensu_stricto_10	3	11	8	11	2	9
d__Bacteria; k__norank_d__Bacteria; p__Actinobacteriota; c__Actinobacteria; o__Micrococcales; f__Dermabacteraceae; g__Brachybacterium	0	13	6	3	12	10
d__Bacteria; k__norank_d__Bacteria; p__Proteobacteria; c__Alphaproteobacteria; o__Ferrovibrionales; f__Ferrovibrionaceae; g__Ferrovibrio	17	8	5	5	5	4
d__Bacteria; k__norank_d__Bacteria; p__Proteobacteria; c__Gammaproteobacteria; o__CCM19a; f__norank_o__CCM19a; g__norank_f__norank_o__CCM19a	7	7	8	8	6	7
d__Bacteria; k__norank_d__Bacteria; p__Proteobacteria; c__Gammaproteobacteria; o__Burkholderiales; f__Methylophilaceae; g__Methylotenera	16	0	4	2	0	21
d__Bacteria; k__norank_d__Bacteria; p__Firmicutes; c__Clostridia; o__Lachnospirales; f__Defluviitaleaceae; g__Defluviitalea	2	6	7	6	9	13
d__Bacteria; k__norank_d__Bacteria; p__Myxococcota; c__Polyangia; o__Polyangiales; f__Sandaracinaceae; g__Sandaracinus	11	8	9	2	6	7
d__Bacteria; k__norank_d__Bacteria; p__Patescibacteria; c__Parcubacteria; o__norank_c__Parcubacteria; f__norank_o__norank_c__Parcubacteria; g__norank_f__norank_o__norank_c__Parcubacteria	14	7	2	6	9	5
d__Bacteria; k__norank_d__Bacteria; p__Patescibacteria; c__Parcubacteria; o__Candidatus_Kaiserbacteria; f__norank_o__Candidatus_Kaiserbacteria; g__norank_f__norank_o__Candidatus_Kaiserbacteria	5	6	0	5	8	18
d__Bacteria; k__norank_d__Bacteria; p__Patescibacteria; c__Gracilibacteria; o__Candidatus_Peribacteria; f__norank_o__Candidatus_Peribacteria; g__norank_f__norank_o__Candidatus_Peribacteria	2	18	4	10	4	4
d__Bacteria; k__norank_d__Bacteria; p__Proteobacteria; c__Gammaproteobacteria; o__Nitrococcales; f__Nitrococcaceae; g__Nitrococcus	7	22	0	3	5	5
d__Bacteria; k__norank_d__Bacteria; p__Proteobacteria; c__Gammaproteobacteria; o__Acidiferrobacterales; f__Acidiferrobacteraceae; g__Sulfurifustis	2	37	1	0	2	0
d__Bacteria; k__norank_d__Bacteria; p__Proteobacteria; c__Alphaproteobacteria; o__Paracaedibacterales; f__Paracaedibacteraceae; g__Candidatus_Paracaedibacter	14	6	3	3	4	12
d__Bacteria; k__norank_d__Bacteria; p__Proteobacteria; c__Alphaproteobacteria; o__Rhodobacterales; f__Rhodobacteraceae; g__norank_f__Rhodobacteraceae	18	2	3	0	9	10
d__Bacteria; k__norank_d__Bacteria; p__Firmicutes; c__Bacilli; o__Thermoactinomycetales; f__Thermoactinomycetaceae; g__Melghirimyces	9	2	9	6	11	4
d__Bacteria; k__norank_d__Bacteria; p__Firmicutes; c__Bacilli; o__Bacillales; f__Bacillaceae; g__Caldibacillus	14	1	7	2	5	12
d__Bacteria; k__norank_d__Bacteria; p__Actinobacteriota; c__Actinobacteria; o__Micrococcales; f__Demequinaceae; g__Demequina	7	10	1	1	15	7
d__Bacteria; k__norank_d__Bacteria; p__Bdellovibrionota; c__Oligoflexia; o__Oligoflexales; f__norank_o__Oligoflexales; g__norank_f__norank_o__Oligoflexales	13	6	2	6	11	3
d__Bacteria; k__norank_d__Bacteria; p__Proteobacteria; c__Alphaproteobacteria; o__Tistrellales; f__Geminicoccaceae; g__Geminicoccus	6	17	1	3	7	6
d__Bacteria; k__norank_d__Bacteria; p__Bacteroidota; c__Bacteroidia; o__Cytophagales; f__Microscillaceae; g__unclassified_f__Microscillaceae	9	3	4	4	19	1
d__Bacteria; k__norank_d__Bacteria; p__Proteobacteria; c__Gammaproteobacteria; o__Burkholderiales; f__Nitrosomonadaceae; g__IS-44	3	7	13	8	4	5
d__Bacteria; k__norank_d__Bacteria; p__Armatimonadota; c__Fimbriimonadia; o__Fimbriimonadales; f__Fimbriimonadaceae; g__norank_f__Fimbriimonadaceae	10	14	1	1	4	10
d__Bacteria; k__norank_d__Bacteria; p__Verrucomicrobiota; c__Verrucomicrobiae; o__Pedosphaerales; f__Pedosphaeraceae; g__Oikopleura	17	0	4	8	3	8
d__Bacteria; k__norank_d__Bacteria; p__Cyanobacteria; c__Cyanobacteriia; o__Geitlerinematales; f__Geitlerinemataceae; g__Geitlerinema	2	1	0	2	32	3
d__Bacteria; k__norank_d__Bacteria; p__Proteobacteria; c__Alphaproteobacteria; o__Thalassobaculales; f__norank_o__Thalassobaculales; g__norank_f__norank_o__Thalassobaculales	4	8	6	6	12	3
d__Bacteria; k__norank_d__Bacteria; p__Actinobacteriota; c__Actinobacteria; o__Corynebacteriales; f__Dietziaceae; g__Dietzia	15	6	2	4	5	7
d__Bacteria; k__norank_d__Bacteria; p__GAL15; c__norank_p__GAL15; o__norank_c__norank_p__GAL15; f__norank_o__norank_c__norank_p__GAL15; g__norank_f__norank_o__norank_c__norank_p__GAL15	0	1	31	2	2	2
d__Bacteria; k__norank_d__Bacteria; p__Proteobacteria; c__Gammaproteobacteria; o__Xanthomonadales; f__Rhodanobacteraceae; g__Dokdonella	14	4	7	4	9	0
d__Bacteria; k__norank_d__Bacteria; p__Proteobacteria; c__Gammaproteobacteria; o__Pseudomonadales; f__Moraxellaceae; g__norank_f__Moraxellaceae	4	1	11	11	9	2
d__Bacteria; k__norank_d__Bacteria; p__Bacteroidota; c__Bacteroidia; o__Flavobacteriales; f__Flavobacteriaceae; g__Mariniflexile	2	6	7	14	5	4
d__Bacteria; k__norank_d__Bacteria; p__Myxococcota; c__Myxococcia; o__Myxococcales; f__Myxococcaceae; g__norank_f__Myxococcaceae	9	6	8	4	7	4
d__Bacteria; k__norank_d__Bacteria; p__Proteobacteria; c__Alphaproteobacteria; o__Rhodobacterales; f__Rhodobacteraceae; g__Actibacterium	4	6	2	4	16	5
d__Bacteria; k__norank_d__Bacteria; p__Desulfobacterota; c__Desulfuromonadia; o__norank_c__Desulfuromonadia; f__Desulfuromonadaceae; g__norank_f__Desulfuromonadaceae	0	11	6	15	4	1
d__Bacteria; k__norank_d__Bacteria; p__Myxococcota; c__Polyangia; o__Polyangiales; f__Polyangiaceae; g__Sorangium	14	4	7	3	4	5
d__Bacteria; k__norank_d__Bacteria; p__Actinobacteriota; c__Actinobacteria; o__Propionibacteriales; f__Nocardioidaceae; g__unclassified_f__Nocardioidaceae	4	3	4	2	11	13
d__Bacteria; k__norank_d__Bacteria; p__Proteobacteria; c__Gammaproteobacteria; o__Salinisphaerales; f__Solimonadaceae; g__Polycyclovorans	2	11	3	8	8	4
d__Bacteria; k__norank_d__Bacteria; p__Myxococcota; c__Myxococcia; o__Myxococcales; f__Vulgatibacteraceae; g__Vulgatibacter	7	10	3	8	5	3
d__Bacteria; k__norank_d__Bacteria; p__Verrucomicrobiota; c__Chlamydiae; o__Chlamydiales; f__Parachlamydiaceae; g__norank_f__Parachlamydiaceae	12	9	0	3	4	8
d__Bacteria; k__norank_d__Bacteria; p__Proteobacteria; c__Gammaproteobacteria; o__Oceanospirillales; f__Alcanivoracaceae; g__Ketobacter	5	7	0	0	4	20
d__Bacteria; k__norank_d__Bacteria; p__Actinobacteriota; c__Actinobacteria; o__Micrococcales; f__Micrococcaceae; g__Arthrobacter	15	6	5	3	4	2
d__Bacteria; k__norank_d__Bacteria; p__Armatimonadota; c__norank_p__Armatimonadota; o__norank_c__norank_p__Armatimonadota; f__norank_o__norank_c__norank_p__Armatimonadota; g__norank_f__norank_o__norank_c__norank_p__Armatimonadota	1	0	6	15	8	5
d__Bacteria; k__norank_d__Bacteria; p__SAR324_cladeMarine_group_B; c__norank_p__SAR324_cladeMarine_group_B; o__norank_c__norank_p__SAR324_cladeMarine_group_B; f__norank_o__norank_c__norank_p__SAR324_cladeMarine_group_B; g__norank_f__norank_o__norank_c__norank_p__SAR324_cladeMarine_group_B	7	4	4	2	7	11
d__Bacteria; k__norank_d__Bacteria; p__Desulfobacterota; c__Desulfuromonadia; o__Geobacterales; f__Geobacteraceae; g__Citrifermentans	0	12	4	12	5	1
d__Bacteria; k__norank_d__Bacteria; p__Chloroflexi; c__Chloroflexia; o__Chloroflexales; f__Chloroflexaceae; g__unclassified_f__Chloroflexaceae	3	10	5	3	5	8
d__Bacteria; k__norank_d__Bacteria; p__Myxococcota; c__Polyangia; o__unclassified_c__Polyangia; f__unclassified_c__Polyangia; g__unclassified_c__Polyangia	3	3	14	9	0	5
d__Bacteria; k__norank_d__Bacteria; p__Firmicutes; c__Clostridia; o__Clostridiales; f__Caloramatoraceae; g__Fonticella	3	13	3	5	5	5
d__Bacteria; k__norank_d__Bacteria; p__Verrucomicrobiota; c__Verrucomicrobiae; o__Pedosphaerales; f__Pedosphaeraceae; g__ADurb.Bin063-1	3	9	2	14	4	1
d__Bacteria; k__norank_d__Bacteria; p__Firmicutes; c__Desulfotomaculia; o__Desulfotomaculales; f__norank_o__Desulfotomaculales; g__Desulfohalotomaculum	3	7	1	6	7	9
d__Bacteria; k__norank_d__Bacteria; p__Actinobacteriota; c__Actinobacteria; o__Micrococcales; f__Bogoriellaceae; g__Georgenia	6	5	2	6	9	5
d__Bacteria; k__norank_d__Bacteria; p__Actinobacteriota; c__Actinobacteria; o__Frankiales; f__Geodermatophilaceae; g__unclassified_f__Geodermatophilaceae	4	8	8	4	5	4
d__Bacteria; k__norank_d__Bacteria; p__Firmicutes; c__Bacilli; o__Thermoactinomycetales; f__Thermoactinomycetaceae; g__Novibacillus	6	4	5	4	13	1
d__Bacteria; k__norank_d__Bacteria; p__Verrucomicrobiota; c__Verrucomicrobiae; o__Verrucomicrobiales; f__Verrucomicrobiaceae; g__Roseimicrobium	4	11	4	1	1	12
d__Bacteria; k__norank_d__Bacteria; p__Proteobacteria; c__Alphaproteobacteria; o__Rhizobiales; f__A0839; g__norank_f__A0839	4	5	11	11	1	1
d__Bacteria; k__norank_d__Bacteria; p__Proteobacteria; c__Alphaproteobacteria; o__Rhizobiales; f__Devosiaceae; g__Pelagibacterium	6	9	0	1	6	10
d__Bacteria; k__norank_d__Bacteria; p__Firmicutes; c__Bacilli; o__Bacillales; f__Planococcaceae; g__Domibacillus	1	13	8	0	3	7
d__Bacteria; k__norank_d__Bacteria; p__Firmicutes; c__Limnochordia; o__MBA03; f__norank_o__MBA03; g__norank_f__norank_o__MBA03	1	3	10	4	4	10
d__Bacteria; k__norank_d__Bacteria; p__Proteobacteria; c__Gammaproteobacteria; o__Burkholderiales; f__Methylophilaceae; g__MM2	1	6	7	11	5	2
d__Bacteria; k__norank_d__Bacteria; p__Actinobacteriota; c__Actinobacteria; o__Kineosporiales; f__Kineosporiaceae; g__Quadrisphaera	4	5	4	6	9	4
d__Bacteria; k__norank_d__Bacteria; p__Verrucomicrobiota; c__Chlamydiae; o__Chlamydiales; f__Simkaniaceae; g__unclassified_f__Simkaniaceae	1	4	1	3	1	22
d__Bacteria; k__norank_d__Bacteria; p__Bacteroidota; c__Kryptonia; o__Kryptoniales; f__BSV26; g__norank_f__BSV26	0	4	12	8	3	5
d__Bacteria; k__norank_d__Bacteria; p__Proteobacteria; c__Alphaproteobacteria; o__Rhodospirillales; f__Magnetospiraceae; g__norank_f__Magnetospiraceae	6	7	5	5	6	3
d__Bacteria; k__norank_d__Bacteria; p__Proteobacteria; c__Alphaproteobacteria; o__Rhodobacterales; f__Rhodobacteraceae; g__Tropicimonas	4	6	2	0	17	2
d__Bacteria; k__norank_d__Bacteria; p__Acidobacteriota; c__AT-s3-28; o__norank_c__AT-s3-28; f__norank_o__norank_c__AT-s3-28; g__norank_f__norank_o__norank_c__AT-s3-28	1	1	3	10	3	13
d__Bacteria; k__norank_d__Bacteria; p__Patescibacteria; c__unclassified_p__Patescibacteria; o__unclassified_p__Patescibacteria; f__unclassified_p__Patescibacteria; g__unclassified_p__Patescibacteria	5	1	5	12	3	5
d__Bacteria; k__norank_d__Bacteria; p__Proteobacteria; c__Alphaproteobacteria; o__Defluviicoccales; f__Defluviicoccaceae; g__Defluviicoccus	4	5	1	3	8	10
d__Bacteria; k__norank_d__Bacteria; p__Bacteroidota; c__Bacteroidia; o__Flavobacteriales; f__Flavobacteriaceae; g__norank_f__Flavobacteriaceae	1	0	2	1	6	21
d__Bacteria; k__norank_d__Bacteria; p__Bacteroidota; c__Bacteroidia; o__Cytophagales; f__MWH-CFBk5; g__norank_f__MWH-CFBk5	3	1	3	4	13	7
d__Bacteria; k__norank_d__Bacteria; p__Acidobacteriota; c__Acidobacteriae; o__Elev-16S-1166; f__norank_o__Elev-16S-1166; g__norank_f__norank_o__Elev-16S-1166	4	4	4	10	6	3
d__Bacteria; k__norank_d__Bacteria; p__Bacteroidota; c__Ignavibacteria; o__Ignavibacteriales; f__unclassified_o__Ignavibacteriales; g__unclassified_o__Ignavibacteriales	1	1	1	6	12	10
d__Bacteria; k__norank_d__Bacteria; p__Actinobacteriota; c__Actinobacteria; o__Streptosporangiales; f__Streptosporangiaceae; g__Streptosporangium	2	4	8	5	7	5
d__Bacteria; k__norank_d__Bacteria; p__Firmicutes; c__Clostridia; o__Lachnospirales; f__Lachnospiraceae; g__Anaerosporobacter	1	3	5	5	9	8
d__Bacteria; k__norank_d__Bacteria; p__Proteobacteria; c__Alphaproteobacteria; o__Sphingomonadales; f__Sphingomonadaceae; g__Rhizorhapis	5	7	3	6	7	2
d__Bacteria; k__norank_d__Bacteria; p__Proteobacteria; c__Gammaproteobacteria; o__Xanthomonadales; f__unclassified_o__Xanthomonadales; g__unclassified_o__Xanthomonadales	5	3	0	3	5	14
d__Bacteria; k__norank_d__Bacteria; p__Proteobacteria; c__Gammaproteobacteria; o__Burkholderiales; f__Alcaligenaceae; g__Achromobacter	4	7	1	0	11	7
d__Bacteria; k__norank_d__Bacteria; p__Firmicutes; c__Bacilli; o__Bacillales; f__Sporolactobacillaceae; g__unclassified_f__Sporolactobacillaceae	2	6	5	1	9	6
d__Bacteria; k__norank_d__Bacteria; p__Patescibacteria; c__Saccharimonadia; o__Saccharimonadales; f__unclassified_o__Saccharimonadales; g__unclassified_o__Saccharimonadales	7	11	1	5	3	2
d__Bacteria; k__norank_d__Bacteria; p__Actinobacteriota; c__Acidimicrobiia; o__Microtrichales; f__Microtrichaceae; g__norank_f__Microtrichaceae	9	4	3	3	5	5
d__Bacteria; k__norank_d__Bacteria; p__Proteobacteria; c__Alphaproteobacteria; o__Caulobacterales; f__Caulobacteraceae; g__Brevundimonas	8	5	5	3	6	2
d__Bacteria; k__norank_d__Bacteria; p__Actinobacteriota; c__Actinobacteria; o__Micrococcales; f__Microbacteriaceae; g__Leucobacter	3	6	3	9	2	5
d__Bacteria; k__norank_d__Bacteria; p__Bacteroidota; c__Bacteroidia; o__Flavobacteriales; f__Flavobacteriaceae; g__Confluentibacter	10	7	1	5	0	5
d__Bacteria; k__norank_d__Bacteria; p__Proteobacteria; c__Alphaproteobacteria; o__Acetobacterales; f__Acetobacteraceae; g__Roseomonas	6	5	10	0	0	7
d__Bacteria; k__norank_d__Bacteria; p__Actinobacteriota; c__Actinobacteria; o__Euzebyales; f__Euzebyaceae; g__norank_f__Euzebyaceae	2	4	5	7	4	6
d__Bacteria; k__norank_d__Bacteria; p__Firmicutes; c__Clostridia; o__unclassified_c__Clostridia; f__unclassified_c__Clostridia; g__unclassified_c__Clostridia	8	9	5	3	0	3
d__Bacteria; k__norank_d__Bacteria; p__Proteobacteria; c__Alphaproteobacteria; o__Elsterales; f__norank_o__Elsterales; g__norank_f__norank_o__Elsterales	2	4	6	6	5	5
d__Bacteria; k__norank_d__Bacteria; p__Firmicutes; c__Bacilli; o__Bacillales; f__Planococcaceae; g__Jeotgalibacillus	6	8	2	3	3	6
d__Bacteria; k__norank_d__Bacteria; p__Planctomycetota; c__unclassified_p__Planctomycetota; o__unclassified_p__Planctomycetota; f__unclassified_p__Planctomycetota; g__unclassified_p__Planctomycetota	3	2	2	5	4	11
d__Bacteria; k__norank_d__Bacteria; p__Firmicutes; c__Bacilli; o__Lactobacillales; f__Lactobacillaceae; g__Lactobacillus	0	0	0	0	27	0
d__Bacteria; k__norank_d__Bacteria; p__Verrucomicrobiota; c__Verrucomicrobiae; o__Pedosphaerales; f__Pedosphaeraceae; g__Ellin516	0	9	1	5	1	11
d__Bacteria; k__norank_d__Bacteria; p__Myxococcota; c__Myxococcia; o__Myxococcales; f__unclassified_o__Myxococcales; g__unclassified_o__Myxococcales	0	4	7	1	12	3
d__Bacteria; k__norank_d__Bacteria; p__Bacteroidota; c__Bacteroidia; o__Chitinophagales; f__Saprospiraceae; g__unclassified_f__Saprospiraceae	4	0	0	1	7	14
d__Bacteria; k__norank_d__Bacteria; p__Bacteroidota; c__Bacteroidia; o__Flavobacteriales; f__Flavobacteriaceae; g__Antarcticibacterium	9	2	2	2	1	10
d__Bacteria; k__norank_d__Bacteria; p__Proteobacteria; c__Gammaproteobacteria; o__Xanthomonadales; f__norank_o__Xanthomonadales; g__norank_f__norank_o__Xanthomonadales	0	6	5	6	2	7
d__Bacteria; k__norank_d__Bacteria; p__Myxococcota; c__Myxococcia; o__Myxococcales; f__Anaeromyxobacteraceae; g__Anaeromyxobacter	1	5	7	8	3	2
d__Bacteria; k__norank_d__Bacteria; p__Actinobacteriota; c__Acidimicrobiia; o__Microtrichales; f__Microtrichaceae; g__IMCC26207	5	4	7	2	1	7
d__Bacteria; k__norank_d__Bacteria; p__Proteobacteria; c__Alphaproteobacteria; o__Rhizobiales; f__Beijerinckiaceae; g__Bosea	0	7	4	1	6	8
d__Bacteria; k__norank_d__Bacteria; p__Verrucomicrobiota; c__Chlamydiae; o__Chlamydiales; f__Criblamydiaceae; g__norank_f__Criblamydiaceae	1	5	1	4	0	14
d__Bacteria; k__norank_d__Bacteria; p__Actinobacteriota; c__Actinobacteria; o__Micrococcales; f__Intrasporangiaceae; g__Ornithinimicrobium	2	4	2	4	1	12
d__Bacteria; k__norank_d__Bacteria; p__Firmicutes; c__Bacilli; o__Bacillales; f__Planococcaceae; g__Rummeliibacillus	4	3	0	3	4	11
d__Bacteria; k__norank_d__Bacteria; p__Firmicutes; c__Clostridia; o__norank_c__Clostridia; f__Hungateiclostridiaceae; g__Anaerobacterium	3	8	1	5	4	4
d__Bacteria; k__norank_d__Bacteria; p__Proteobacteria; c__Gammaproteobacteria; o__Burkholderiales; f__Comamonadaceae; g__Piscinibacter	11	1	3	1	3	6
d__Bacteria; k__norank_d__Bacteria; p__Firmicutes; c__Clostridia; o__Clostridiales; f__Clostridiaceae; g__Clostridium_sensu_stricto_7	5	6	6	0	3	5
d__Bacteria; k__norank_d__Bacteria; p__Firmicutes; c__Clostridia; o__Clostridiales; f__Clostridiaceae; g__Clostridium_sensu_stricto_12	5	4	4	4	3	5
d__Bacteria; k__norank_d__Bacteria; p__Firmicutes; c__Bacilli; o__Bacillales; f__Bacillaceae; g__Sinibacillus	2	3	9	3	6	2
d__Bacteria; k__norank_d__Bacteria; p__Chloroflexi; c__Chloroflexia; o__Thermomicrobiales; f__Thermomicrobiaceae; g__Sphaerobacter	4	6	1	1	2	11
d__Bacteria; k__norank_d__Bacteria; p__Firmicutes; c__Clostridia; o__norank_c__Clostridia; f__Gracilibacteraceae; g__Lutispora	6	6	2	1	3	7
d__Bacteria; k__norank_d__Bacteria; p__Proteobacteria; c__Alphaproteobacteria; o__Reyranellales; f__Reyranellaceae; g__Reyranella	3	3	3	7	3	6
d__Bacteria; k__norank_d__Bacteria; p__Firmicutes; c__Clostridia; o__Lachnospirales; f__Lachnospiraceae; g__Herbinix	10	4	1	5	2	2
d__Bacteria; k__norank_d__Bacteria; p__Proteobacteria; c__Alphaproteobacteria; o__Rhizobiales; f__Rhizobiaceae; g__Mesorhizobium	3	1	2	1	6	11
d__Bacteria; k__norank_d__Bacteria; p__Firmicutes; c__Clostridia; o__Clostridiales; f__Clostridiaceae; g__Clostridium_sensu_stricto_15	2	2	5	6	1	8
d__Bacteria; k__norank_d__Bacteria; p__Patescibacteria; c__Microgenomatia; o__Candidatus_Pacebacteria; f__norank_o__Candidatus_Pacebacteria; g__norank_f__norank_o__Candidatus_Pacebacteria	8	8	1	0	0	7
d__Bacteria; k__norank_d__Bacteria; p__Patescibacteria; c__Gracilibacteria; o__Candidatus_Peregrinibacteria; f__norank_o__Candidatus_Peregrinibacteria; g__norank_f__norank_o__Candidatus_Peregrinibacteria	1	1	0	2	3	17
d__Bacteria; k__norank_d__Bacteria; p__Actinobacteriota; c__Actinobacteria; o__Micromonosporales; f__Micromonosporaceae; g__Salinispora	3	6	1	0	0	14
d__Bacteria; k__norank_d__Bacteria; p__Firmicutes; c__Bacilli; o__Bacillales; f__Bacillaceae; g__Amphibacillus	2	2	11	3	3	2
d__Bacteria; k__norank_d__Bacteria; p__Proteobacteria; c__Gammaproteobacteria; o__Burkholderiales; f__Oxalobacteraceae; g__Massilia	2	2	7	2	6	4
d__Bacteria; k__norank_d__Bacteria; p__Proteobacteria; c__Gammaproteobacteria; o__Xanthomonadales; f__Rhodanobacteraceae; g__Pseudofulvimonas	7	2	2	2	3	7
d__Bacteria; k__norank_d__Bacteria; p__Proteobacteria; c__Alphaproteobacteria; o__Rhizobiales; f__Rhizobiales_Incertae_Sedis; g__norank_f__Rhizobiales_Incertae_Sedis	5	0	4	5	7	2
d__Bacteria; k__norank_d__Bacteria; p__Firmicutes; c__Clostridia; o__Clostridiales; f__Clostridiaceae; g__Clostridium_sensu_stricto_6	5	5	3	1	3	6
d__Bacteria; k__norank_d__Bacteria; p__Proteobacteria; c__Alphaproteobacteria; o__Sphingomonadales; f__Sphingomonadaceae; g__Qipengyuania	2	6	1	0	10	4
d__Bacteria; k__norank_d__Bacteria; p__Firmicutes; c__Bacilli; o__Bacillales; f__Marinococcaceae; g__norank_f__Marinococcaceae	1	0	1	2	14	5
d__Bacteria; k__norank_d__Bacteria; p__Proteobacteria; c__Alphaproteobacteria; o__Rhodobacterales; f__Rhodobacteraceae; g__Roseovarius	7	0	1	1	2	11
d__Bacteria; k__norank_d__Bacteria; p__Firmicutes; c__Clostridia; o__Eubacteriales; f__Garciellaceae; g__Irregularibacter	5	4	3	6	1	3
d__Bacteria; k__norank_d__Bacteria; p__Actinobacteriota; c__Actinobacteria; o__Glycomycetales; f__Glycomycetaceae; g__Glycomyces	2	2	3	2	12	1
d__Bacteria; k__norank_d__Bacteria; p__Proteobacteria; c__Gammaproteobacteria; o__BD72BR169; f__norank_o__BD72BR169; g__norank_f__norank_o__BD72BR169	0	0	0	22	0	0
d__Bacteria; k__norank_d__Bacteria; p__Verrucomicrobiota; c__Verrucomicrobiae; o__Chthoniobacterales; f__Chthoniobacteraceae; g__unclassified_f__Chthoniobacteraceae	6	5	0	4	3	4
d__Bacteria; k__norank_d__Bacteria; p__Proteobacteria; c__Alphaproteobacteria; o__Kiloniellales; f__Kiloniellaceae; g__Tagaea	2	7	3	3	0	7
d__Bacteria; k__norank_d__Bacteria; p__Proteobacteria; c__Gammaproteobacteria; o__EV818SWSAP88; f__norank_o__EV818SWSAP88; g__norank_f__norank_o__EV818SWSAP88	0	5	7	5	1	4
d__Bacteria; k__norank_d__Bacteria; p__Proteobacteria; c__Gammaproteobacteria; o__Burkholderiales; f__Gallionellaceae; g__Candidatus_Nitrotoga	0	16	1	5	0	0
d__Bacteria; k__norank_d__Bacteria; p__Patescibacteria; c__Kazania; o__norank_c__Kazania; f__norank_o__norank_c__Kazania; g__norank_f__norank_o__norank_c__Kazania	7	4	0	2	5	3
d__Bacteria; k__norank_d__Bacteria; p__Myxococcota; c__Polyangia; o__Polyangiales; f__Polyangiaceae; g__Polyangium	3	4	1	3	2	8
d__Bacteria; k__norank_d__Bacteria; p__Proteobacteria; c__Alphaproteobacteria; o__Caulobacterales; f__Caulobacteraceae; g__unclassified_f__Caulobacteraceae	7	7	1	4	2	0
d__Bacteria; k__norank_d__Bacteria; p__Firmicutes; c__Clostridia; o__Peptostreptococcales-Tissierellales; f__norank_o__Peptostreptococcales-Tissierellales; g__Gottschalkia	6	7	0	1	5	2
d__Bacteria; k__norank_d__Bacteria; p__Firmicutes; c__Bacilli; o__Bacillales; f__unclassified_o__Bacillales; g__unclassified_o__Bacillales	4	4	3	3	1	6
d__Bacteria; k__norank_d__Bacteria; p__Proteobacteria; c__Gammaproteobacteria; o__Burkholderiales; f__Sutterellaceae; g__norank_f__Sutterellaceae	3	0	5	8	4	1
d__Bacteria; k__norank_d__Bacteria; p__Actinobacteriota; c__Actinobacteria; o__Streptosporangiales; f__Nocardiopsaceae; g__Nocardiopsis	4	4	3	2	4	3
d__Bacteria; k__norank_d__Bacteria; p__Cyanobacteria; c__Cyanobacteriia; o__Oxyphotobacteria_Incertae_Sedis; f__unclassified_o__Oxyphotobacteria_Incertae_Sedis; g__Leptolyngbya_ANT.L52.2	0	2	2	5	1	10
d__Bacteria; k__norank_d__Bacteria; p__Actinobacteriota; c__Actinobacteria; o__Propionibacteriales; f__Propionibacteriaceae; g__Microlunatus	2	4	6	2	4	2
d__Bacteria; k__norank_d__Bacteria; p__Actinobacteriota; c__Actinobacteria; o__Corynebacteriales; f__Nocardiaceae; g__Nocardia	5	1	5	3	6	0
d__Bacteria; k__norank_d__Bacteria; p__Firmicutes; c__Syntrophomonadia; o__Syntrophomonadales; f__Syntrophomonadaceae; g__Syntrophomonas	0	0	4	5	2	9
d__Bacteria; k__norank_d__Bacteria; p__Actinobacteriota; c__Actinobacteria; o__Micrococcales; f__Brevibacteriaceae; g__Brevibacterium	0	5	3	1	6	5
d__Bacteria; k__norank_d__Bacteria; p__Bacteroidota; c__Bacteroidia; o__Flavobacteriales; f__Flavobacteriaceae; g__Planktosalinus	3	2	1	0	0	14
d__Bacteria; k__norank_d__Bacteria; p__Firmicutes; c__Bacilli; o__Bacillales; f__Sporolactobacillaceae; g__Pullulanibacillus	3	1	8	1	0	7
d__Bacteria; k__norank_d__Bacteria; p__Firmicutes; c__Bacilli; o__Bacillales; f__Bacillaceae; g__Piscibacillus	0	0	1	2	10	6
d__Bacteria; k__norank_d__Bacteria; p__Armatimonadota; c__Chthonomonadetes; o__Chthonomonadales; f__norank_o__Chthonomonadales; g__norank_f__norank_o__Chthonomonadales	0	6	2	0	2	9
d__Bacteria; k__norank_d__Bacteria; p__Firmicutes; c__Bacilli; o__Thermoactinomycetales; f__Thermoactinomycetaceae; g__Risungbinella	3	2	10	2	0	2
d__Bacteria; k__norank_d__Bacteria; p__Proteobacteria; c__Gammaproteobacteria; o__Burkholderiales; f__Comamonadaceae; g__Caenimonas	7	1	4	0	5	2
d__Bacteria; k__norank_d__Bacteria; p__Proteobacteria; c__Alphaproteobacteria; o__Micavibrionales; f__Micavibrionaceae; g__norank_f__Micavibrionaceae	1	1	1	1	1	14
d__Bacteria; k__norank_d__Bacteria; p__Acidobacteriota; c__Acidobacteriae; o__unclassified_c__Acidobacteriae; f__unclassified_c__Acidobacteriae; g__unclassified_c__Acidobacteriae	3	8	0	3	0	5
d__Bacteria; k__norank_d__Bacteria; p__Firmicutes; c__Clostridia; o__Oscillospirales; f__Ethanoligenenaceae; g__norank_f__Ethanoligenenaceae	9	1	2	0	1	5
d__Bacteria; k__norank_d__Bacteria; p__Actinobacteriota; c__Actinobacteria; o__Frankiales; f__unclassified_o__Frankiales; g__unclassified_o__Frankiales	2	4	5	0	4	3
d__Bacteria; k__norank_d__Bacteria; p__Acidobacteriota; c__Subgroup_18; o__norank_c__Subgroup_18; f__norank_o__norank_c__Subgroup_18; g__norank_f__norank_o__norank_c__Subgroup_18	4	1	6	0	3	4
d__Bacteria; k__norank_d__Bacteria; p__Actinobacteriota; c__Actinobacteria; o__Pseudonocardiales; f__Pseudonocardiaceae; g__norank_f__Pseudonocardiaceae	4	3	0	7	0	4
d__Bacteria; k__norank_d__Bacteria; p__Bacteroidota; c__Bacteroidia; o__Flavobacteriales; f__Flavobacteriaceae; g__Salinimicrobium	8	4	0	0	4	2
d__Bacteria; k__norank_d__Bacteria; p__Firmicutes; c__Bacilli; o__Staphylococcales; f__Staphylococcaceae; g__Salinicoccus	0	1	10	0	4	3
d__Bacteria; k__norank_d__Bacteria; p__Bacteroidota; c__Rhodothermia; o__Balneolales; f__Balneolaceae; g__norank_f__Balneolaceae	0	3	2	0	7	6
d__Bacteria; k__norank_d__Bacteria; p__Firmicutes; c__Clostridia; o__norank_c__Clostridia; f__Gracilibacteraceae; g__Gracilibacter	3	3	1	3	0	7
d__Bacteria; k__norank_d__Bacteria; p__Proteobacteria; c__Gammaproteobacteria; o__Burkholderiales; f__Oxalobacteraceae; g__Noviherbaspirillum	9	0	3	1	0	4
d__Bacteria; k__norank_d__Bacteria; p__Actinobacteriota; c__Actinobacteria; o__Frankiales; f__Sporichthyaceae; g__norank_f__Sporichthyaceae	0	1	1	8	2	5
d__Bacteria; k__norank_d__Bacteria; p__Bacteroidota; c__Bacteroidia; o__Chitinophagales; f__unclassified_o__Chitinophagales; g__unclassified_o__Chitinophagales	2	3	3	0	1	8
d__Bacteria; k__norank_d__Bacteria; p__Firmicutes; c__Bacilli; o__Haloplasmatales; f__Haloplasmataceae; g__Haloplasma	1	5	7	2	0	2
d__Bacteria; k__norank_d__Bacteria; p__Bacteroidota; c__Bacteroidia; o__Cytophagales; f__Hymenobacteraceae; g__Adhaeribacter	2	5	4	2	4	0
d__Bacteria; k__norank_d__Bacteria; p__Cyanobacteria; c__Vampirivibrionia; o__Obscuribacterales; f__Obscuribacteraceae; g__norank_f__Obscuribacteraceae	2	4	0	0	1	9
d__Bacteria; k__norank_d__Bacteria; p__Bacteroidota; c__Bacteroidia; o__Flavobacteriales; f__Flavobacteriaceae; g__Gillisia	12	0	1	1	2	0
d__Bacteria; k__norank_d__Bacteria; p__Bacteroidota; c__Bacteroidia; o__Chitinophagales; f__Chitinophagaceae; g__Chitinophaga	5	0	0	0	6	5
d__Bacteria; k__norank_d__Bacteria; p__Firmicutes; c__Bacilli; o__Thermoactinomycetales; f__Thermoactinomycetaceae; g__Shimazuella	1	3	1	1	5	5
d__Bacteria; k__norank_d__Bacteria; p__Acidobacteriota; c__Vicinamibacteria; o__Vicinamibacterales; f__Vicinamibacteraceae; g__Vicinamibacter	2	3	4	5	0	2
d__Bacteria; k__norank_d__Bacteria; p__Myxococcota; c__Polyangia; o__Nannocystales; f__Nannocystaceae; g__norank_f__Nannocystaceae	1	1	1	7	1	5
d__Bacteria; k__norank_d__Bacteria; p__Firmicutes; c__Desulfitobacteriia; o__Desulfitobacteriales; f__Desulfitobacteriaceae; g__Desulfosporosinus	1	3	2	6	2	2
d__Bacteria; k__norank_d__Bacteria; p__Actinobacteriota; c__Actinobacteria; o__Propionibacteriales; f__Propionibacteriaceae; g__Haloactinopolyspora	3	0	3	0	7	3
d__Bacteria; k__norank_d__Bacteria; p__Firmicutes; c__Clostridia; o__Oscillospirales; f__Ruminococcaceae; g__Caproiciproducens	16	0	0	0	0	0
d__Bacteria; k__norank_d__Bacteria; p__Actinobacteriota; c__Actinobacteria; o__Euzebyales; f__Euzebyaceae; g__Euzebya	1	4	3	3	4	1
d__Bacteria; k__norank_d__Bacteria; p__Firmicutes; c__Clostridia; o__norank_c__Clostridia; f__Hungateiclostridiaceae; g__norank_f__Hungateiclostridiaceae	1	3	0	8	0	4
d__Bacteria; k__norank_d__Bacteria; p__Bacteroidota; c__Bacteroidia; o__Sphingobacteriales; f__Sphingobacteriaceae; g__Sphingobacterium	8	2	3	0	2	1
d__Bacteria; k__norank_d__Bacteria; p__Firmicutes; c__unclassified_p__Firmicutes; o__unclassified_p__Firmicutes; f__unclassified_p__Firmicutes; g__unclassified_p__Firmicutes	5	0	0	0	5	6
d__Bacteria; k__norank_d__Bacteria; p__Verrucomicrobiota; c__Verrucomicrobiae; o__Opitutales; f__Opitutaceae; g__Lacunisphaera	2	0	1	0	2	11
d__Bacteria; k__norank_d__Bacteria; p__Proteobacteria; c__Gammaproteobacteria; o__AT-s2-59; f__norank_o__AT-s2-59; g__norank_f__norank_o__AT-s2-59	3	0	0	0	5	7
d__Bacteria; k__norank_d__Bacteria; p__Proteobacteria; c__Gammaproteobacteria; o__Enterobacterales; f__Enterobacteriaceae; g__unclassified_f__Enterobacteriaceae	4	0	1	4	6	0
d__Bacteria; k__norank_d__Bacteria; p__Verrucomicrobiota; c__Chlamydiae; o__Chlamydiales; f__Chlamydiaceae; g__unclassified_f__Chlamydiaceae	4	3	0	0	2	6
d__Bacteria; k__norank_d__Bacteria; p__Bacteroidota; c__Bacteroidia; o__Sphingobacteriales; f__unclassified_o__Sphingobacteriales; g__unclassified_o__Sphingobacteriales	0	4	9	2	0	0
d__Bacteria; k__norank_d__Bacteria; p__Chloroflexi; c__Anaerolineae; o__Anaerolineales; f__Anaerolineaceae; g__UTCFX1	1	4	0	6	2	2
d__Bacteria; k__norank_d__Bacteria; p__Proteobacteria; c__Gammaproteobacteria; o__Nitrosococcales; f__Nitrosococcaceae; g__SZB85	1	4	2	0	6	2
d__Bacteria; k__norank_d__Bacteria; p__Firmicutes; c__Bacilli; o__Caldalkalibacillales; f__Caldalkalibacillaceae; g__Caldalkalibacillus	3	0	3	0	6	3
d__Bacteria; k__norank_d__Bacteria; p__Proteobacteria; c__Alphaproteobacteria; o__Rhodospirillales; f__Rhodospirillaceae; g__norank_f__Rhodospirillaceae	4	5	0	3	2	1
d__Bacteria; k__norank_d__Bacteria; p__Dependentiae; c__Babeliae; o__Babeliales; f__UBA12411; g__norank_f__UBA12411	0	1	4	2	5	2
d__Bacteria; k__norank_d__Bacteria; p__Firmicutes; c__Limnochordia; o__M55-D21; f__norank_o__M55-D21; g__norank_f__norank_o__M55-D21	0	1	2	9	2	0
d__Bacteria; k__norank_d__Bacteria; p__Firmicutes; c__Clostridia; o__Lachnospirales; f__Lachnospiraceae; g__Anaerocolumna	4	1	3	4	1	1
d__Bacteria; k__norank_d__Bacteria; p__Patescibacteria; c__WWE3; o__norank_c__WWE3; f__norank_o__norank_c__WWE3; g__norank_f__norank_o__norank_c__WWE3	2	2	0	1	6	3
d__Bacteria; k__norank_d__Bacteria; p__Firmicutes; c__Clostridia; o__Peptostreptococcales-Tissierellales; f__norank_o__Peptostreptococcales-Tissierellales; g__Clostridium_sensu_stricto	0	1	0	2	5	6
d__Bacteria; k__norank_d__Bacteria; p__Bacteroidota; c__Bacteroidia; o__Flavobacteriales; f__NS9_marine_group; g__norank_f__NS9_marine_group	6	2	1	1	0	4
d__Bacteria; k__norank_d__Bacteria; p__Actinobacteriota; c__Actinobacteria; o__Corynebacteriales; f__Corynebacteriaceae; g__Corynebacterium	4	1	1	1	2	5
d__Bacteria; k__norank_d__Bacteria; p__Firmicutes; c__Clostridia; o__norank_c__Clostridia; f__Hungateiclostridiaceae; g__HN-HF0106	1	1	1	2	5	4
d__Bacteria; k__norank_d__Bacteria; p__Myxococcota; c__Polyangia; o__Polyangiales; f__Polyangiaceae; g__unclassified_f__Polyangiaceae	0	1	4	3	0	6
d__Bacteria; k__norank_d__Bacteria; p__Actinobacteriota; c__Thermoleophilia; o__Gaiellales; f__unclassified_o__Gaiellales; g__unclassified_o__Gaiellales	0	5	2	3	1	3
d__Bacteria; k__norank_d__Bacteria; p__Actinobacteriota; c__Actinobacteria; o__Micromonosporales; f__Micromonosporaceae; g__Catelliglobosispora	3	0	7	1	1	2
d__Bacteria; k__norank_d__Bacteria; p__Cyanobacteria; c__Cyanobacteriia; o__unclassified_c__Cyanobacteriia; f__unclassified_c__Cyanobacteriia; g__unclassified_c__Cyanobacteriia	0	8	0	0	3	3
d__Bacteria; k__norank_d__Bacteria; p__Proteobacteria; c__Alphaproteobacteria; o__Rhizobiales; f__Xanthobacteraceae; g__Pseudolabrys	8	1	0	4	1	0
d__Bacteria; k__norank_d__Bacteria; p__Firmicutes; c__Clostridia; o__Clostridiales; f__Clostridiaceae; g__Clostridium_sensu_stricto_18	4	6	1	2	0	1
d__Bacteria; k__norank_d__Bacteria; p__Patescibacteria; c__Parcubacteria; o__Candidatus_Adlerbacteria; f__norank_o__Candidatus_Adlerbacteria; g__norank_f__norank_o__Candidatus_Adlerbacteria	2	4	1	3	1	2
d__Bacteria; k__norank_d__Bacteria; p__Firmicutes; c__Clostridia; o__Oscillospirales; f__unclassified_o__Oscillospirales; g__unclassified_o__Oscillospirales	0	0	6	3	3	1
d__Bacteria; k__norank_d__Bacteria; p__Dependentiae; c__Babeliae; o__Babeliales; f__Babeliaceae; g__norank_f__Babeliaceae	0	0	11	2	0	0
d__Bacteria; k__norank_d__Bacteria; p__Firmicutes; c__Clostridia; o__Clostridiales; f__Clostridiaceae; g__unclassified_f__Clostridiaceae	5	1	2	0	5	0
d__Bacteria; k__norank_d__Bacteria; p__Cyanobacteria; c__Cyanobacteriia; o__Cyanobacteriales; f__Nostocaceae; g__unclassified_f__Nostocaceae	1	1	0	2	0	9
d__Bacteria; k__norank_d__Bacteria; p__Bacteroidota; c__Bacteroidia; o__Flavobacteriales; f__Weeksellaceae; g__Chryseobacterium	10	0	0	0	0	3
d__Bacteria; k__norank_d__Bacteria; p__Actinobacteriota; c__Actinobacteria; o__unclassified_c__Actinobacteria; f__unclassified_c__Actinobacteria; g__unclassified_c__Actinobacteria	0	2	2	4	3	2
d__Bacteria; k__norank_d__Bacteria; p__Proteobacteria; c__Alphaproteobacteria; o__Micavibrionales; f__unclassified_o__Micavibrionales; g__unclassified_o__Micavibrionales	1	0	3	1	2	6
d__Bacteria; k__norank_d__Bacteria; p__Myxococcota; c__Polyangia; o__Polyangiales; f__Eel-36e1D6; g__norank_f__Eel-36e1D6	0	1	2	3	5	2
d__Bacteria; k__norank_d__Bacteria; p__Bacteroidota; c__Bacteroidia; o__Chitinophagales; f__Chitinophagaceae; g__Lacibacter	4	2	1	1	5	0
d__Bacteria; k__norank_d__Bacteria; p__Verrucomicrobiota; c__Verrucomicrobiae; o__Pedosphaerales; f__Pedosphaeraceae; g__unclassified_f__Pedosphaeraceae	4	0	1	0	2	5
d__Bacteria; k__norank_d__Bacteria; p__Actinobacteriota; c__Actinobacteria; o__Micrococcales; f__Micrococcaceae; g__Enteractinococcus	1	0	1	4	3	3
d__Bacteria; k__norank_d__Bacteria; p__Firmicutes; c__Clostridia; o__Oscillospirales; f__Oscillospiraceae; g__unclassified_f__Oscillospiraceae	0	0	0	0	11	1
d__Bacteria; k__norank_d__Bacteria; p__Actinobacteriota; c__Actinobacteria; o__Micrococcales; f__Sanguibacteraceae; g__Sanguibacter	2	3	0	4	2	1
d__Bacteria; k__norank_d__Bacteria; p__Desulfobacterota; c__Desulfuromonadia; o__norank_c__Desulfuromonadia; f__Geoalkalibacteraceae; g__Geoalkalibacter	0	0	2	6	2	2
d__Bacteria; k__norank_d__Bacteria; p__Proteobacteria; c__Gammaproteobacteria; o__Burkholderiales; f__Methylophilaceae; g__unclassified_f__Methylophilaceae	8	1	1	0	1	1
d__Bacteria; k__norank_d__Bacteria; p__Verrucomicrobiota; c__Chlamydiae; o__Chlamydiales; f__Criblamydiaceae; g__Criblamydia	3	1	0	1	3	4
d__Bacteria; k__norank_d__Bacteria; p__Firmicutes; c__Clostridia; o__Clostridia_vadinBB60_group; f__norank_o__Clostridia_vadinBB60_group; g__norank_f__norank_o__Clostridia_vadinBB60_group	8	0	0	2	2	0
d__Bacteria; k__norank_d__Bacteria; p__Firmicutes; c__Clostridia; o__Clostridiales; f__Clostridiaceae; g__Clostridium_sensu_stricto_3	2	0	5	0	1	4
d__Bacteria; k__norank_d__Bacteria; p__Proteobacteria; c__Gammaproteobacteria; o__Competibacterales; f__Competibacteraceae; g__Plasticicumulans	0	4	1	2	3	2
d__Bacteria; k__norank_d__Bacteria; p__Firmicutes; c__Bacilli; o__Bacillales; f__Bacillaceae; g__Aeribacillus	0	1	7	1	0	3
d__Bacteria; k__norank_d__Bacteria; p__Firmicutes; c__Clostridia; o__Lachnospirales; f__Lachnospiraceae; g__Lachnoclostridium	3	3	0	4	0	2
d__Bacteria; k__norank_d__Bacteria; p__Bacteroidota; c__Bacteroidia; o__Sphingobacteriales; f__AKYH767; g__norank_f__AKYH767	3	3	1	5	0	0
d__Bacteria; k__norank_d__Bacteria; p__Proteobacteria; c__Gammaproteobacteria; o__Xanthomonadales; f__Rhodanobacteraceae; g__Ahniella	1	5	0	5	0	0
d__Bacteria; k__norank_d__Bacteria; p__Proteobacteria; c__Gammaproteobacteria; o__JG36-GS-52; f__norank_o__JG36-GS-52; g__norank_f__norank_o__JG36-GS-52	1	3	3	0	1	3
d__Bacteria; k__norank_d__Bacteria; p__Firmicutes; c__Desulfotomaculia; o__Desulfotomaculales; f__norank_o__Desulfotomaculales; g__norank_f__norank_o__Desulfotomaculales	0	1	1	5	3	1
d__Bacteria; k__norank_d__Bacteria; p__Proteobacteria; c__Gammaproteobacteria; o__Aeromonadales; f__Aeromonadaceae; g__Aeromonas	1	6	0	0	4	0
d__Bacteria; k__norank_d__Bacteria; p__Bdellovibrionota; c__Oligoflexia; o__Silvanigrellales; f__Silvanigrellaceae; g__norank_f__Silvanigrellaceae	0	2	0	4	4	1
d__Bacteria; k__norank_d__Bacteria; p__Bacteroidota; c__Bacteroidia; o__Sphingobacteriales; f__KD3-93; g__norank_f__KD3-93	5	1	0	0	4	1
d__Bacteria; k__norank_d__Bacteria; p__Actinobacteriota; c__Actinobacteria; o__Corynebacteriales; f__Nocardiaceae; g__unclassified_f__Nocardiaceae	1	1	3	0	2	4
d__Bacteria; k__norank_d__Bacteria; p__Bacteroidota; c__Bacteroidia; o__Cytophagales; f__Cyclobacteriaceae; g__Catalinimonas	3	2	1	0	3	2
d__Bacteria; k__norank_d__Bacteria; p__Proteobacteria; c__Alphaproteobacteria; o__Rhodobacterales; f__Rhodobacteraceae; g__Rhodobacter	2	1	0	1	7	0
d__Bacteria; k__norank_d__Bacteria; p__Firmicutes; c__Bacilli; o__Thermoactinomycetales; f__Thermoactinomycetaceae; g__unclassified_f__Thermoactinomycetaceae	3	2	0	0	0	6
d__Bacteria; k__norank_d__Bacteria; p__Halanaerobiaeota; c__Halanaerobiia; o__Halanaerobiales; f__Halobacteroidaceae; g__norank_f__Halobacteroidaceae	0	0	0	6	1	4
d__Bacteria; k__norank_d__Bacteria; p__Acidobacteriota; c__Blastocatellia; o__Blastocatellales; f__Blastocatellaceae; g__Aridibacter	3	3	0	2	3	0
d__Bacteria; k__norank_d__Bacteria; p__Proteobacteria; c__Alphaproteobacteria; o__Rhizobiales; f__Devosiaceae; g__unclassified_f__Devosiaceae	4	0	0	1	1	5
d__Bacteria; k__norank_d__Bacteria; p__Bacteroidota; c__Rhodothermia; o__Rhodothermales; f__Rhodothermaceae; g__unclassified_f__Rhodothermaceae	3	3	1	0	3	1
d__Bacteria; k__norank_d__Bacteria; p__Patescibacteria; c__Parcubacteria; o__unclassified_c__Parcubacteria; f__unclassified_c__Parcubacteria; g__unclassified_c__Parcubacteria	4	2	0	0	0	5
d__Bacteria; k__norank_d__Bacteria; p__Bacteroidota; c__Bacteroidia; o__Chitinophagales; f__norank_o__Chitinophagales; g__norank_f__norank_o__Chitinophagales	0	4	1	0	1	5
d__Bacteria; k__norank_d__Bacteria; p__Acidobacteriota; c__Subgroup_20; o__norank_c__Subgroup_20; f__norank_o__norank_c__Subgroup_20; g__norank_f__norank_o__norank_c__Subgroup_20	0	1	5	3	1	0
d__Bacteria; k__norank_d__Bacteria; p__Proteobacteria; c__Gammaproteobacteria; o__1013-28-CG33; f__norank_o__1013-28-CG33; g__norank_f__norank_o__1013-28-CG33	1	1	2	6	0	0
d__Bacteria; k__norank_d__Bacteria; p__Proteobacteria; c__Gammaproteobacteria; o__Burkholderiales; f__Alcaligenaceae; g__Bordetella	8	0	0	0	2	0
d__Bacteria; k__norank_d__Bacteria; p__Bacteroidota; c__Kapabacteria; o__Kapabacteriales; f__norank_o__Kapabacteriales; g__norank_f__norank_o__Kapabacteriales	2	0	2	1	1	4
d__Bacteria; k__norank_d__Bacteria; p__Proteobacteria; c__Alphaproteobacteria; o__Rhizobiales; f__Pleomorphomonadaceae; g__Chthonobacter	1	2	4	1	1	1
d__Bacteria; k__norank_d__Bacteria; p__Proteobacteria; c__Alphaproteobacteria; o__Ferrovibrionales; f__norank_o__Ferrovibrionales; g__norank_f__norank_o__Ferrovibrionales	0	2	1	0	4	3
d__Bacteria; k__norank_d__Bacteria; p__Proteobacteria; c__Gammaproteobacteria; o__211ds20; f__norank_o__211ds20; g__norank_f__norank_o__211ds20	5	0	0	0	4	1
d__Bacteria; k__norank_d__Bacteria; p__Proteobacteria; c__Alphaproteobacteria; o__Caulobacterales; f__Hyphomonadaceae; g__Hyphomonas	5	1	0	1	2	1
d__Bacteria; k__norank_d__Bacteria; p__Firmicutes; c__Bacilli; o__Exiguobacterales; f__Exiguobacteraceae; g__Exiguobacterium	2	4	0	0	4	0
d__Bacteria; k__norank_d__Bacteria; p__Chloroflexi; c__Chloroflexia; o__Chloroflexales; f__Herpetosiphonaceae; g__Herpetosiphon	0	0	3	5	1	1
d__Bacteria; k__norank_d__Bacteria; p__Actinobacteriota; c__unclassified_p__Actinobacteriota; o__unclassified_p__Actinobacteriota; f__unclassified_p__Actinobacteriota; g__unclassified_p__Actinobacteriota	3	1	2	0	0	4
d__Bacteria; k__norank_d__Bacteria; p__Patescibacteria; c__Saccharimonadia; o__Saccharimonadales; f__Saccharimonadaceae; g__unclassified_f__Saccharimonadaceae	3	0	1	1	4	1
d__Bacteria; k__norank_d__Bacteria; p__Actinobacteriota; c__Actinobacteria; o__Micromonosporales; f__Micromonosporaceae; g__norank_f__Micromonosporaceae	0	2	1	2	1	4
d__Bacteria; k__norank_d__Bacteria; p__Proteobacteria; c__Gammaproteobacteria; o__Nitrosococcales; f__Nitrosococcaceae; g__wb1-P19	0	4	6	0	0	0
d__Bacteria; k__norank_d__Bacteria; p__Proteobacteria; c__Alphaproteobacteria; o__Kiloniellales; f__Kiloniellaceae; g__norank_f__Kiloniellaceae	2	0	0	5	3	0
d__Bacteria; k__norank_d__Bacteria; p__Proteobacteria; c__Alphaproteobacteria; o__Rhodobacterales; f__Rhodobacteraceae; g__Paracoccus	1	1	1	1	1	4
d__Bacteria; k__norank_d__Bacteria; p__Desulfobacterota; c__Desulfovibrionia; o__Desulfovibrionales; f__Desulfovibrionaceae; g__Desulfovibrio	0	0	3	1	0	5
d__Bacteria; k__norank_d__Bacteria; p__Proteobacteria; c__Alphaproteobacteria; o__Rhodobacterales; f__Rhodobacteraceae; g__Wenxinia	1	4	0	2	2	0
d__Bacteria; k__norank_d__Bacteria; p__Myxococcota; c__Polyangia; o__FFCH16767; f__norank_o__FFCH16767; g__norank_f__norank_o__FFCH16767	2	2	2	1	0	2
d__Bacteria; k__norank_d__Bacteria; p__FCPU426; c__norank_p__FCPU426; o__norank_c__norank_p__FCPU426; f__norank_o__norank_c__norank_p__FCPU426; g__norank_f__norank_o__norank_c__norank_p__FCPU426	0	0	0	9	0	0
d__Bacteria; k__norank_d__Bacteria; p__Firmicutes; c__Bacilli; o__Thermoactinomycetales; f__Thermoactinomycetaceae; g__Seinonella	0	1	2	0	1	5
d__Bacteria; k__norank_d__Bacteria; p__Planctomycetota; c__Phycisphaerae; o__Phycisphaerales; f__Phycisphaeraceae; g__I-8	0	4	0	5	0	0
d__Bacteria; k__norank_d__Bacteria; p__Firmicutes; c__Clostridia; o__Peptostreptococcales-Tissierellales; f__norank_o__Peptostreptococcales-Tissierellales; g__unclassified_f__norank_o__Peptostreptococcales-Tissierellales	1	2	0	0	2	4
d__Bacteria; k__norank_d__Bacteria; p__Bacteroidota; c__Bacteroidia; o__Flavobacteriales; f__Flavobacteriaceae; g__Vitellibacter	3	3	3	0	0	0
d__Bacteria; k__norank_d__Bacteria; p__Actinobacteriota; c__Actinobacteria; o__Pseudonocardiales; f__Pseudonocardiaceae; g__Amycolatopsis	5	0	1	1	0	2
d__Bacteria; k__norank_d__Bacteria; p__Firmicutes; c__Clostridia; o__Clostridiales; f__Clostridiaceae; g__Clostridium_sensu_stricto_2	9	0	0	0	0	0
d__Bacteria; k__norank_d__Bacteria; p__Bacteroidota; c__Bacteroidia; o__Chitinophagales; f__Chitinophagaceae; g__Flavihumibacter	0	0	2	6	0	0
d__Bacteria; k__norank_d__Bacteria; p__Gemmatimonadota; c__unclassified_p__Gemmatimonadota; o__unclassified_p__Gemmatimonadota; f__unclassified_p__Gemmatimonadota; g__unclassified_p__Gemmatimonadota	0	0	0	0	0	8
d__Bacteria; k__norank_d__Bacteria; p__Bacteroidota; c__Bacteroidia; o__Cytophagales; f__Amoebophilaceae; g__Candidatus_Amoebophilus	0	0	2	2	0	4
d__Bacteria; k__norank_d__Bacteria; p__Firmicutes; c__Thermovenabulia; o__Thermovenabulales; f__norank_o__Thermovenabulales; g__Tepidanaerobacter	2	4	0	1	1	0
d__Bacteria; k__norank_d__Bacteria; p__Firmicutes; c__BRH-c20a; o__norank_c__BRH-c20a; f__norank_o__norank_c__BRH-c20a; g__norank_f__norank_o__norank_c__BRH-c20a	1	0	0	2	4	1
d__Bacteria; k__norank_d__Bacteria; p__Proteobacteria; c__Gammaproteobacteria; o__Oceanospirillales; f__Hahellaceae; g__Hahella	2	0	3	1	0	2
d__Bacteria; k__norank_d__Bacteria; p__Firmicutes; c__Thermoanaerobacteria; o__Thermoanaerobacterales; f__SRB2; g__norank_f__SRB2	0	0	0	8	0	0
d__Bacteria; k__norank_d__Bacteria; p__Verrucomicrobiota; c__Verrucomicrobiae; o__Verrucomicrobiales; f__Rubritaleaceae; g__Roseibacillus	2	0	1	1	0	4
d__Bacteria; k__norank_d__Bacteria; p__Proteobacteria; c__Gammaproteobacteria; o__Cellvibrionales; f__Halieaceae; g__Haliea	3	2	0	0	0	3
d__Bacteria; k__norank_d__Bacteria; p__Actinobacteriota; c__Actinobacteria; o__Pseudonocardiales; f__Pseudonocardiaceae; g__Crossiella	0	2	4	0	0	2
d__Bacteria; k__norank_d__Bacteria; p__Firmicutes; c__Clostridia; o__Eubacteriales; f__Garciellaceae; g__unclassified_f__Garciellaceae	1	2	2	1	0	2
d__Bacteria; k__norank_d__Bacteria; p__Armatimonadota; c__Chthonomonadetes; o__Chthonomonadales; f__Chthonomonadaceae; g__Chthonomonas	0	1	2	5	0	0
d__Bacteria; k__norank_d__Bacteria; p__Firmicutes; c__Desulfotomaculia; o__Desulfotomaculales; f__norank_o__Desulfotomaculales; g__Desulfofarcimen	0	2	3	0	1	2
d__Bacteria; k__norank_d__Bacteria; p__Firmicutes; c__Limnochordia; o__Limnochordales; f__norank_o__Limnochordales; g__norank_f__norank_o__Limnochordales	5	0	1	2	0	0
d__Bacteria; k__norank_d__Bacteria; p__Firmicutes; c__Clostridia; o__Clostridia_UCG-014; f__norank_o__Clostridia_UCG-014; g__norank_f__norank_o__Clostridia_UCG-014	1	0	2	0	0	5
d__Bacteria; k__norank_d__Bacteria; p__Bacteroidota; c__Bacteroidia; o__Bacteroidetes_VC2.1_Bac22; f__norank_o__Bacteroidetes_VC2.1_Bac22; g__norank_f__norank_o__Bacteroidetes_VC2.1_Bac22	6	0	1	0	0	0
d__Bacteria; k__norank_d__Bacteria; p__Actinobacteriota; c__Actinobacteria; o__Pseudonocardiales; f__Pseudonocardiaceae; g__Actinomycetospora	0	1	1	4	1	0
d__Bacteria; k__norank_d__Bacteria; p__Bacteroidota; c__Bacteroidia; o__Chitinophagales; f__Chitinophagaceae; g__Flavitalea	2	2	1	0	2	0
d__Bacteria; k__norank_d__Bacteria; p__Cyanobacteria; c__Cyanobacteriia; o__Thermosynechococcales; f__Thermosynechococcaceae; g__Synechococcus_IR11	0	1	0	0	0	6
d__Bacteria; k__norank_d__Bacteria; p__Firmicutes; c__Bacilli; o__Alicyclobacillales; f__Alicyclobacillaceae; g__Alicyclobacillus	4	3	0	0	0	0
d__Bacteria; k__norank_d__Bacteria; p__Firmicutes; c__Clostridia; o__Eubacteriales; f__norank_o__Eubacteriales; g__Alkalibaculum	4	1	0	1	1	0
d__Bacteria; k__norank_d__Bacteria; p__Cyanobacteria; c__Vampirivibrionia; o__Vampirovibrionales; f__Vampirovibrionaceae; g__norank_f__Vampirovibrionaceae	1	1	0	0	0	5
d__Bacteria; k__norank_d__Bacteria; p__Verrucomicrobiota; c__Verrucomicrobiae; o__Opitutales; f__Opitutaceae; g__Diplosphaera	5	0	0	0	2	0
d__Bacteria; k__norank_d__Bacteria; p__Firmicutes; c__Clostridia; o__Peptostreptococcales-Tissierellales; f__Thermotaleaceae; g__Anaerosolibacter	0	2	3	0	0	2
d__Bacteria; k__norank_d__Bacteria; p__Firmicutes; c__Bacilli; o__Lactobacillales; f__Aerococcaceae; g__Aerococcus	0	2	2	1	2	0
d__Bacteria; k__norank_d__Bacteria; p__Proteobacteria; c__Gammaproteobacteria; o__Enterobacterales; f__Yersiniaceae; g__Serratia	0	0	1	0	3	3
d__Bacteria; k__norank_d__Bacteria; p__Bacteroidota; c__Bacteroidia; o__Cytophagales; f__Cyclobacteriaceae; g__Fulvivirga	0	0	3	0	3	1
d__Bacteria; k__norank_d__Bacteria; p__Firmicutes; c__Clostridia; o__norank_c__Clostridia; f__Hungateiclostridiaceae; g__Pseudobacteroides	1	3	1	0	1	1
d__Bacteria; k__norank_d__Bacteria; p__Actinobacteriota; c__Thermoleophilia; o__Solirubrobacterales; f__Solirubrobacteraceae; g__Patulibacter	1	4	0	0	0	2
d__Bacteria; k__norank_d__Bacteria; p__Firmicutes; c__Bacilli; o__Lactobacillales; f__Aerococcaceae; g__Aerosphaera	2	0	2	3	0	0
d__Bacteria; k__norank_d__Bacteria; p__Actinobacteriota; c__Coriobacteriia; o__Coriobacteriales; f__Atopobiaceae; g__Olsenella	0	0	0	0	7	0
d__Bacteria; k__norank_d__Bacteria; p__Desulfobacterota; c__Desulfobulbia; o__Desulfobulbales; f__unclassified_o__Desulfobulbales; g__unclassified_o__Desulfobulbales	0	0	3	3	1	0
d__Bacteria; k__norank_d__Bacteria; p__Bacteroidota; c__Bacteroidia; o__Sphingobacteriales; f__NS11-12_marine_group; g__norank_f__NS11-12_marine_group	0	0	1	3	0	3
d__Bacteria; k__norank_d__Bacteria; p__Firmicutes; c__Bacilli; o__Paenibacillales; f__Paenibacillaceae; g__Ammoniibacillus	0	1	2	1	2	1
d__Bacteria; k__norank_d__Bacteria; p__Patescibacteria; c__Gracilibacteria; o__norank_c__Gracilibacteria; f__norank_o__norank_c__Gracilibacteria; g__norank_f__norank_o__norank_c__Gracilibacteria	5	0	0	0	2	0
d__Bacteria; k__norank_d__Bacteria; p__Bacteroidota; c__Bacteroidia; o__Chitinophagales; f__Chitinophagaceae; g__unclassified_f__Chitinophagaceae	5	2	0	0	0	0
d__Bacteria; k__norank_d__Bacteria; p__Firmicutes; c__Clostridia; o__Peptostreptococcales-Tissierellales; f__norank_o__Peptostreptococcales-Tissierellales; g__norank_f__norank_o__Peptostreptococcales-Tissierellales	0	0	3	0	1	3
d__Bacteria; k__norank_d__Bacteria; p__Firmicutes; c__Bacilli; o__Paenibacillales; f__Paenibacillaceae; g__norank_f__Paenibacillaceae	2	2	1	0	2	0
d__Bacteria; k__norank_d__Bacteria; p__Bacteroidota; c__Bacteroidia; o__Flavobacteriales; f__Flavobacteriaceae; g__Salegentibacter	2	0	0	0	1	3
d__Bacteria; k__norank_d__Bacteria; p__Patescibacteria; c__Microgenomatia; o__Candidatus_Chisholmbacteria; f__norank_o__Candidatus_Chisholmbacteria; g__norank_f__norank_o__Candidatus_Chisholmbacteria	0	0	0	0	0	6
d__Bacteria; k__norank_d__Bacteria; p__Planctomycetota; c__Planctomycetes; o__unclassified_c__Planctomycetes; f__unclassified_c__Planctomycetes; g__unclassified_c__Planctomycetes	0	0	0	0	0	6
d__Bacteria; k__norank_d__Bacteria; p__Firmicutes; c__Clostridia; o__Lachnospirales; f__Lachnospiraceae; g__CHKCI001	0	1	2	0	3	0
d__Bacteria; k__norank_d__Bacteria; p__Planctomycetota; c__BD7-11; o__norank_c__BD7-11; f__norank_o__norank_c__BD7-11; g__norank_f__norank_o__norank_c__BD7-11	0	2	0	2	0	2
d__Bacteria; k__norank_d__Bacteria; p__Proteobacteria; c__Alphaproteobacteria; o__Rickettsiales; f__Rickettsiaceae; g__norank_f__Rickettsiaceae	2	0	0	3	0	1
d__Bacteria; k__norank_d__Bacteria; p__Actinobacteriota; c__Actinobacteria; o__Propionibacteriales; f__Propionibacteriaceae; g__unclassified_f__Propionibacteriaceae	1	0	2	0	2	1
d__Bacteria; k__norank_d__Bacteria; p__Firmicutes; c__Moorellia; o__Desulfitibacterales; f__Desulfitibacteraceae; g__Desulfitibacter	1	0	0	0	0	5
d__Bacteria; k__norank_d__Bacteria; p__Chloroflexi; c__Anaerolineae; o__SJA-15; f__norank_o__SJA-15; g__norank_f__norank_o__SJA-15	5	0	0	1	0	0
d__Bacteria; k__norank_d__Bacteria; p__Sumerlaeota; c__Sumerlaeia; o__norank_c__Sumerlaeia; f__norank_o__norank_c__Sumerlaeia; g__norank_f__norank_o__norank_c__Sumerlaeia	0	3	1	2	0	0
d__Bacteria; k__norank_d__Bacteria; p__Dependentiae; c__Babeliae; o__Babeliales; f__UBA12409; g__norank_f__UBA12409	0	0	2	3	1	0
d__Bacteria; k__norank_d__Bacteria; p__Firmicutes; c__Clostridia; o__Proteinivoracales; f__norank_o__Proteinivoracales; g__norank_f__norank_o__Proteinivoracales	0	2	1	1	2	0
d__Bacteria; k__norank_d__Bacteria; p__Desulfobacterota; c__Desulfobacteria; o__Desulfobacterales; f__Desulfosarcinaceae; g__Desulfatitalea	0	0	3	1	2	0
d__Bacteria; k__norank_d__Bacteria; p__Patescibacteria; c__Parcubacteria; o__Candidatus_Campbellbacteria; f__norank_o__Candidatus_Campbellbacteria; g__norank_f__norank_o__Candidatus_Campbellbacteria	0	0	0	0	0	6
d__Bacteria; k__norank_d__Bacteria; p__Firmicutes; c__Symbiobacteriia; o__Symbiobacteriales; f__Symbiobacteraceae; g__unclassified_f__Symbiobacteraceae	0	0	1	2	3	0
d__Bacteria; k__norank_d__Bacteria; p__Bacteroidota; c__Bacteroidia; o__Bacteroidales; f__Dysgonomonadaceae; g__Proteiniphilum	0	0	2	0	4	0
d__Bacteria; k__norank_d__Bacteria; p__Proteobacteria; c__Alphaproteobacteria; o__Thalassobaculales; f__Thalassobaculaceae; g__Thalassobaculum	0	3	1	1	1	0
d__Bacteria; k__norank_d__Bacteria; p__Actinobacteriota; c__Actinobacteria; o__Micrococcales; f__Microbacteriaceae; g__unclassified_f__Microbacteriaceae	0	0	4	2	0	0
d__Bacteria; k__norank_d__Bacteria; p__Proteobacteria; c__Gammaproteobacteria; o__Xanthomonadales; f__Rhodanobacteraceae; g__Tahibacter	0	3	1	2	0	0
d__Bacteria; k__norank_d__Bacteria; p__Firmicutes; c__Bacilli; o__Lactobacillales; f__Aerococcaceae; g__Facklamia	0	0	5	1	0	0
d__Bacteria; k__norank_d__Bacteria; p__Actinobacteriota; c__Acidimicrobiia; o__unclassified_c__Acidimicrobiia; f__unclassified_c__Acidimicrobiia; g__unclassified_c__Acidimicrobiia	0	0	2	0	0	4
d__Bacteria; k__norank_d__Bacteria; p__Proteobacteria; c__Alphaproteobacteria; o__Rhizobiales; f__Rhizobiaceae; g__Chelativorans	4	0	1	0	0	1
d__Bacteria; k__norank_d__Bacteria; p__Verrucomicrobiota; c__Verrucomicrobiae; o__Verrucomicrobiales; f__Verrucomicrobiaceae; g__norank_f__Verrucomicrobiaceae	2	0	0	3	0	1
d__Bacteria; k__norank_d__Bacteria; p__Proteobacteria; c__Alphaproteobacteria; o__Micropepsales; f__Micropepsaceae; g__norank_f__Micropepsaceae	1	0	0	3	0	2
d__Bacteria; k__norank_d__Bacteria; p__Proteobacteria; c__Alphaproteobacteria; o__Rhizobiales; f__Xanthobacteraceae; g__unclassified_f__Xanthobacteraceae	0	0	0	1	0	4
d__Bacteria; k__norank_d__Bacteria; p__Firmicutes; c__Limnochordia; o__unclassified_c__Limnochordia; f__unclassified_c__Limnochordia; g__unclassified_c__Limnochordia	0	0	1	3	0	1
d__Bacteria; k__norank_d__Bacteria; p__Firmicutes; c__Bacilli; o__Bacillales; f__Planococcaceae; g__unclassified_f__Planococcaceae	3	0	0	0	0	2
d__Bacteria; k__norank_d__Bacteria; p__Actinobacteriota; c__Actinobacteria; o__Micromonosporales; f__Micromonosporaceae; g__Actinoplanes	0	0	1	0	0	4
d__Bacteria; k__norank_d__Bacteria; p__Actinobacteriota; c__Actinobacteria; o__Nitriliruptorales; f__Nitriliruptoraceae; g__Nitriliruptor	1	0	0	0	3	1
d__Bacteria; k__norank_d__Bacteria; p__Firmicutes; c__Clostridia; o__Oscillospirales; f__Ruminococcaceae; g__Anaerotruncus	0	0	2	3	0	0
d__Bacteria; k__norank_d__Bacteria; p__Proteobacteria; c__Gammaproteobacteria; o__Cellvibrionales; f__Porticoccaceae; g__C1-B045	1	2	0	2	0	0
d__Bacteria; k__norank_d__Bacteria; p__Actinobacteriota; c__Actinobacteria; o__Pseudonocardiales; f__Pseudonocardiaceae; g__Thermocrispum	1	0	0	3	0	1
d__Bacteria; k__norank_d__Bacteria; p__Firmicutes; c__Dethiobacteria; o__Dethiobacterales; f__Dethiobacteraceae; g__Dethiobacter	0	1	0	2	0	2
d__Bacteria; k__norank_d__Bacteria; p__Proteobacteria; c__Gammaproteobacteria; o__Nitrococcales; f__Nitrococcales_Incertae_Sedis; g__Methylonatrum	1	2	0	0	2	0
d__Bacteria; k__norank_d__Bacteria; p__Proteobacteria; c__Alphaproteobacteria; o__Acetobacterales; f__Acetobacteraceae; g__Craurococcus-Caldovatus	0	0	2	0	1	2
d__Bacteria; k__norank_d__Bacteria; p__Planctomycetota; c__Planctomycetes; o__Isosphaerales; f__Isosphaeraceae; g__norank_f__Isosphaeraceae	3	0	0	0	0	2
d__Bacteria; k__norank_d__Bacteria; p__Proteobacteria; c__Gammaproteobacteria; o__Burkholderiales; f__Burkholderiaceae; g__unclassified_f__Burkholderiaceae	2	0	0	3	0	0
d__Bacteria; k__norank_d__Bacteria; p__Bdellovibrionota; c__Oligoflexia; o__Silvanigrellales; f__Silvanigrellaceae; g__Silvanigrella	0	0	0	2	3	0
d__Bacteria; k__norank_d__Bacteria; p__Proteobacteria; c__Alphaproteobacteria; o__Rhodospirillales; f__norank_o__Rhodospirillales; g__norank_f__norank_o__Rhodospirillales	1	0	0	1	1	2
d__Bacteria; k__norank_d__Bacteria; p__Firmicutes; c__Negativicutes; o__Veillonellales-Selenomonadales; f__Sporomusaceae; g__Sporomusa	0	0	1	0	0	4
d__Bacteria; k__norank_d__Bacteria; p__Acidobacteriota; c__Subgroup_19; o__norank_c__Subgroup_19; f__norank_o__norank_c__Subgroup_19; g__norank_f__norank_o__norank_c__Subgroup_19	0	0	1	0	0	4
d__Bacteria; k__norank_d__Bacteria; p__Actinobacteriota; c__Actinobacteria; o__Micrococcales; f__Micrococcaceae; g__Garicola	0	0	0	0	1	4
d__Bacteria; k__norank_d__Bacteria; p__Proteobacteria; c__Gammaproteobacteria; o__Xanthomonadales; f__Xanthomonadaceae; g__Stenotrophomonas	0	1	1	0	1	2
d__Bacteria; k__norank_d__Bacteria; p__Verrucomicrobiota; c__Omnitrophia; o__Omnitrophales; f__unclassified_o__Omnitrophales; g__unclassified_o__Omnitrophales	0	1	0	4	0	0
d__Bacteria; k__norank_d__Bacteria; p__Proteobacteria; c__Alphaproteobacteria; o__Rickettsiales; f__unclassified_o__Rickettsiales; g__unclassified_o__Rickettsiales	2	0	1	0	0	2
d__Bacteria; k__norank_d__Bacteria; p__WPS-2; c__norank_p__WPS-2; o__norank_c__norank_p__WPS-2; f__norank_o__norank_c__norank_p__WPS-2; g__norank_f__norank_o__norank_c__norank_p__WPS-2	3	0	2	0	0	0
d__Bacteria; k__norank_d__Bacteria; p__Verrucomicrobiota; c__Verrucomicrobiae; o__Verrucomicrobiales; f__Verrucomicrobiaceae; g__Prosthecobacter	0	0	0	1	0	4
d__Bacteria; k__norank_d__Bacteria; p__Firmicutes; c__Clostridia; o__Peptostreptococcales-Tissierellales; f__Thermotaleaceae; g__unclassified_f__Thermotaleaceae	2	1	1	0	0	1
d__Bacteria; k__norank_d__Bacteria; p__Desulfobacterota; c__Desulfuromonadia; o__PB19; f__norank_o__PB19; g__norank_f__norank_o__PB19	0	0	2	0	1	2
d__Bacteria; k__norank_d__Bacteria; p__Firmicutes; c__Clostridia; o__Lachnospirales; f__unclassified_o__Lachnospirales; g__unclassified_o__Lachnospirales	0	3	0	1	1	0
d__Bacteria; k__norank_d__Bacteria; p__Firmicutes; c__Negativicutes; o__Veillonellales-Selenomonadales; f__Sporomusaceae; g__norank_f__Sporomusaceae	0	1	2	0	1	0
d__Bacteria; k__norank_d__Bacteria; p__Firmicutes; c__Clostridia; o__Oscillospirales; f__Oscillospiraceae; g__Oscillibacter	0	0	4	0	0	0
d__Bacteria; k__norank_d__Bacteria; p__Planctomycetota; c__Planctomycetes; o__Pirellulales; f__Pirellulaceae; g__unclassified_f__Pirellulaceae	0	0	0	0	4	0
d__Bacteria; k__norank_d__Bacteria; p__Firmicutes; c__Thermacetogenia; o__Thermacetogeniales; f__Thermacetogeniaceae; g__Thermacetogenium	2	1	0	0	0	1
d__Bacteria; k__norank_d__Bacteria; p__Verrucomicrobiota; c__Verrucomicrobiae; o__Chthoniobacterales; f__unclassified_o__Chthoniobacterales; g__unclassified_o__Chthoniobacterales	1	1	0	0	0	2
d__Bacteria; k__norank_d__Bacteria; p__Bacteroidota; c__Bacteroidia; o__Cytophagales; f__Cyclobacteriaceae; g__Echinicola	0	0	0	0	4	0
d__Bacteria; k__norank_d__Bacteria; p__Verrucomicrobiota; c__Verrucomicrobiae; o__Chthoniobacterales; f__Chthoniobacteraceae; g__LD29	0	0	0	0	0	4
d__Bacteria; k__norank_d__Bacteria; p__Actinobacteriota; c__Actinobacteria; o__Micrococcales; f__Beutenbergiaceae; g__Salana	0	0	1	3	0	0
d__Bacteria; k__norank_d__Bacteria; p__Proteobacteria; c__Gammaproteobacteria; o__Acidithiobacillales; f__Acidithiobacillaceae; g__TX1A-55	0	0	1	2	1	0
d__Bacteria; k__norank_d__Bacteria; p__Patescibacteria; c__Parcubacteria; o__Candidatus_Wolfebacteria; f__norank_o__Candidatus_Wolfebacteria; g__norank_f__norank_o__Candidatus_Wolfebacteria	2	0	0	0	0	2
d__Bacteria; k__norank_d__Bacteria; p__Bacteroidota; c__Bacteroidia; o__Chitinophagales; f__Chitinophagaceae; g__Niabella	2	0	2	0	0	0
d__Bacteria; k__norank_d__Bacteria; p__Cyanobacteria; c__Cyanobacteriia; o__Cyanobacteriales; f__Cyanobacteriaceae; g__Symphothece_PCC-7002	0	0	0	0	0	4
d__Bacteria; k__norank_d__Bacteria; p__Firmicutes; c__Bacilli; o__unclassified_c__Bacilli; f__unclassified_c__Bacilli; g__unclassified_c__Bacilli	0	0	0	0	0	4
d__Bacteria; k__norank_d__Bacteria; p__Proteobacteria; c__Gammaproteobacteria; o__Burkholderiales; f__Oxalobacteraceae; g__Oxalicibacterium	1	0	0	0	0	3
d__Bacteria; k__norank_d__Bacteria; p__Proteobacteria; c__Alphaproteobacteria; o__Rhodobacterales; f__Rhodobacteraceae; g__Silicimonas	0	0	0	0	1	3
d__Bacteria; k__norank_d__Bacteria; p__Firmicutes; c__norank_p__Firmicutes; o__norank_c__norank_p__Firmicutes; f__norank_o__norank_c__norank_p__Firmicutes; g__norank_f__norank_o__norank_c__norank_p__Firmicutes	0	0	0	0	0	4
d__Bacteria; k__norank_d__Bacteria; p__Firmicutes; c__Bacilli; o__Lactobacillales; f__Carnobacteriaceae; g__Desemzia	2	0	1	0	1	0
d__Bacteria; k__norank_d__Bacteria; p__Proteobacteria; c__Alphaproteobacteria; o__Micavibrionales; f__Micavibrionaceae; g__Micavibrio	0	0	0	0	0	4
d__Bacteria; k__norank_d__Bacteria; p__Planctomycetota; c__Planctomycetes; o__Planctomycetales; f__norank_o__Planctomycetales; g__norank_f__norank_o__Planctomycetales	0	0	0	0	4	0
d__Bacteria; k__norank_d__Bacteria; p__Bacteroidota; c__Bacteroidia; o__Flavobacteriales; f__Weeksellaceae; g__Moheibacter	4	0	0	0	0	0
d__Bacteria; k__norank_d__Bacteria; p__Actinobacteriota; c__Actinobacteria; o__Streptosporangiales; f__Thermomonosporaceae; g__unclassified_f__Thermomonosporaceae	1	0	3	0	0	0
d__Bacteria; k__norank_d__Bacteria; p__Actinobacteriota; c__Actinobacteria; o__Micromonosporales; f__Micromonosporaceae; g__Actinocatenispora	0	0	0	0	0	4
d__Bacteria; k__norank_d__Bacteria; p__Proteobacteria; c__Alphaproteobacteria; o__Rhizobiales; f__Xanthobacteraceae; g__Starkeya	0	3	0	1	0	0
d__Bacteria; k__norank_d__Bacteria; p__Proteobacteria; c__Gammaproteobacteria; o__Burkholderiales; f__Oxalobacteraceae; g__norank_f__Oxalobacteraceae	0	4	0	0	0	0
d__Bacteria; k__norank_d__Bacteria; p__Firmicutes; c__Bacilli; o__Lactobacillales; f__Carnobacteriaceae; g__Alkalibacterium	0	1	1	1	0	1
d__Bacteria; k__norank_d__Bacteria; p__Firmicutes; c__Clostridia; o__Clostridiales; f__Clostridiaceae; g__Hathewaya	0	1	2	0	0	1
d__Bacteria; k__norank_d__Bacteria; p__Spirochaetota; c__Spirochaetia; o__Spirochaetales; f__Spirochaetaceae; g__Spirochaeta	1	0	0	0	1	2
d__Bacteria; k__norank_d__Bacteria; p__Actinobacteriota; c__Thermoleophilia; o__Solirubrobacterales; f__Solirubrobacteraceae; g__norank_f__Solirubrobacteraceae	0	0	0	0	0	4
d__Bacteria; k__norank_d__Bacteria; p__Patescibacteria; c__Parcubacteria; o__Candidatus_Yanofskybacteria; f__norank_o__Candidatus_Yanofskybacteria; g__norank_f__norank_o__Candidatus_Yanofskybacteria	0	0	0	4	0	0
d__Bacteria; k__norank_d__Bacteria; p__Firmicutes; c__Clostridia; o__Christensenellales; f__Christensenellaceae; g__Christensenellaceae_R-7_group	0	2	0	0	0	2
d__Bacteria; k__norank_d__Bacteria; p__Firmicutes; c__Clostridia; o__Lachnospirales; f__Lachnospiraceae; g__Lachnotalea	1	0	0	0	3	0
d__Bacteria; k__norank_d__Bacteria; p__Actinobacteriota; c__Thermoleophilia; o__Solirubrobacterales; f__Solirubrobacteraceae; g__JCM_18997	0	0	0	0	0	4
d__Bacteria; k__norank_d__Bacteria; p__Proteobacteria; c__Alphaproteobacteria; o__Alphaproteobacteria_Incertae_Sedis; f__unclassified_o__Alphaproteobacteria_Incertae_Sedis; g__Acuticoccus	0	0	2	0	0	2
d__Bacteria; k__norank_d__Bacteria; p__Firmicutes; c__Desulfotomaculia; o__Desulfotomaculales; f__norank_o__Desulfotomaculales; g__Pelotomaculum	0	4	0	0	0	0
d__Bacteria; k__norank_d__Bacteria; p__Proteobacteria; c__Alphaproteobacteria; o__Parvibaculales; f__Parvibaculaceae; g__Parvibaculum	1	0	1	2	0	0
d__Bacteria; k__norank_d__Bacteria; p__Patescibacteria; c__Parcubacteria; o__UBA9983; f__norank_o__UBA9983; g__norank_f__norank_o__UBA9983	0	0	0	3	0	0
d__Bacteria; k__norank_d__Bacteria; p__Proteobacteria; c__Gammaproteobacteria; o__Alteromonadales; f__Alteromonadaceae; g__Rheinheimera	0	0	0	0	1	2
d__Bacteria; k__norank_d__Bacteria; p__Proteobacteria; c__Gammaproteobacteria; o__Oceanospirillales; f__P13-46; g__norank_f__P13-46	2	1	0	0	0	0
d__Bacteria; k__norank_d__Bacteria; p__Actinobacteriota; c__Acidimicrobiia; o__Microtrichales; f__Microtrichaceae; g__Sva0996_marine_group	1	0	0	0	2	0
d__Bacteria; k__norank_d__Bacteria; p__Actinobacteriota; c__Acidimicrobiia; o__Microtrichales; f__Ilumatobacteraceae; g__CL500-29_marine_group	0	2	1	0	0	0
d__Bacteria; k__norank_d__Bacteria; p__Proteobacteria; c__Gammaproteobacteria; o__JTB23; f__norank_o__JTB23; g__norank_f__norank_o__JTB23	0	1	0	0	1	1
d__Bacteria; k__norank_d__Bacteria; p__Proteobacteria; c__Gammaproteobacteria; o__Oceanospirillales; f__unclassified_o__Oceanospirillales; g__unclassified_o__Oceanospirillales	0	1	0	1	1	0
d__Bacteria; k__norank_d__Bacteria; p__Patescibacteria; c__Parcubacteria; o__Candidatus_Colwellbacteria; f__norank_o__Candidatus_Colwellbacteria; g__norank_f__norank_o__Candidatus_Colwellbacteria	0	0	0	0	0	3
d__Bacteria; k__norank_d__Bacteria; p__Proteobacteria; c__Gammaproteobacteria; o__Nitrococcales; f__Nitrococcaceae; g__unclassified_f__Nitrococcaceae	0	1	0	0	2	0
d__Bacteria; k__norank_d__Bacteria; p__Cyanobacteria; c__Cyanobacteriia; o__Cyanobacteriales; f__Desertifilaceae; g__CENA533	0	0	3	0	0	0
d__Bacteria; k__norank_d__Bacteria; p__Actinobacteriota; c__Actinobacteria; o__Micrococcales; f__Micrococcaceae; g__Paeniglutamicibacter	0	0	0	0	3	0
d__Bacteria; k__norank_d__Bacteria; p__Proteobacteria; c__Gammaproteobacteria; o__Enterobacterales; f__Enterobacteriaceae; g__Shimwellia	0	3	0	0	0	0
d__Bacteria; k__norank_d__Bacteria; p__Proteobacteria; c__Alphaproteobacteria; o__Rhizobiales; f__Rhizobiaceae; g__Bartonella	0	3	0	0	0	0
d__Bacteria; k__norank_d__Bacteria; p__Planctomycetota; c__Phycisphaerae; o__Phycisphaerales; f__Phycisphaeraceae; g__unclassified_f__Phycisphaeraceae	0	3	0	0	0	0
d__Bacteria; k__norank_d__Bacteria; p__Bacteroidota; c__Bacteroidia; o__Cytophagales; f__Flammeovirgaceae; g__Luteivirga	0	1	2	0	0	0
d__Bacteria; k__norank_d__Bacteria; p__Proteobacteria; c__Gammaproteobacteria; o__Burkholderiales; f__Alcaligenaceae; g__Candidimonas	0	0	0	0	0	3
d__Bacteria; k__norank_d__Bacteria; p__Proteobacteria; c__Gammaproteobacteria; o__Gammaproteobacteria_Incertae_Sedis; f__unclassified_o__Gammaproteobacteria_Incertae_Sedis; g__Candidatus_Endonucleariobacter	0	0	0	3	0	0
d__Bacteria; k__norank_d__Bacteria; p__Myxococcota; c__Polyangia; o__Polyangiales; f__Sandaracinaceae; g__unclassified_f__Sandaracinaceae	0	1	0	0	0	2
d__Bacteria; k__norank_d__Bacteria; p__Firmicutes; c__Clostridia; o__Peptostreptococcales-Tissierellales; f__Peptostreptococcaceae; g__unclassified_f__Peptostreptococcaceae	0	3	0	0	0	0
d__Bacteria; k__norank_d__Bacteria; p__Nitrospirota; c__Leptospirillia; o__Leptospirillales; f__Leptospirillaceae; g__Leptospirillum	0	2	0	1	0	0
d__Bacteria; k__norank_d__Bacteria; p__Bacteroidota; c__Bacteroidia; o__Flavobacteriales; f__Flavobacteriaceae; g__Sediminicola	0	0	0	0	3	0
d__Bacteria; k__norank_d__Bacteria; p__Firmicutes; c__Clostridia; o__norank_c__Clostridia; f__Hungateiclostridiaceae; g__Fastidiosipila	0	0	1	0	2	0
d__Bacteria; k__norank_d__Bacteria; p__Desulfobacterota; c__Desulfuromonadia; o__Bradymonadales; f__Bradymonadaceae; g__norank_f__Bradymonadaceae	1	0	0	0	2	0
d__Bacteria; k__norank_d__Bacteria; p__Firmicutes; c__Desulfotomaculia; o__Desulfotomaculales; f__Desulfallas-Sporotomaculum; g__BRH-c8a	3	0	0	0	0	0
d__Bacteria; k__norank_d__Bacteria; p__Proteobacteria; c__Alphaproteobacteria; o__Rickettsiales; f__Fokiniaceae; g__norank_f__Fokiniaceae	0	1	0	0	2	0
d__Bacteria; k__norank_d__Bacteria; p__Chloroflexi; c__N9D0; o__norank_c__N9D0; f__norank_o__norank_c__N9D0; g__norank_f__norank_o__norank_c__N9D0	1	0	0	0	0	2
d__Bacteria; k__norank_d__Bacteria; p__Actinobacteriota; c__Actinobacteria; o__Pseudonocardiales; f__Pseudonocardiaceae; g__Prauserella	2	1	0	0	0	0
d__Bacteria; k__norank_d__Bacteria; p__Desulfobacterota; c__Desulfuromonadia; o__Bradymonadales; f__norank_o__Bradymonadales; g__norank_f__norank_o__Bradymonadales	0	1	0	0	0	2
d__Bacteria; k__norank_d__Bacteria; p__Bacteroidota; c__Bacteroidia; o__Sphingobacteriales; f__Sphingobacteriaceae; g__unclassified_f__Sphingobacteriaceae	0	0	0	1	2	0
d__Bacteria; k__norank_d__Bacteria; p__Patescibacteria; c__Parcubacteria; o__Candidatus_Terrybacteria; f__norank_o__Candidatus_Terrybacteria; g__norank_f__norank_o__Candidatus_Terrybacteria	0	3	0	0	0	0
d__Bacteria; k__norank_d__Bacteria; p__Bacteroidota; c__Bacteroidia; o__Flavobacteriales; f__Flavobacteriaceae; g__Aequorivita	0	0	3	0	0	0
d__Bacteria; k__norank_d__Bacteria; p__Proteobacteria; c__Gammaproteobacteria; o__Granulosicoccales; f__norank_o__Granulosicoccales; g__norank_f__norank_o__Granulosicoccales	1	0	0	0	0	2
d__Bacteria; k__norank_d__Bacteria; p__Firmicutes; c__Clostridia; o__Clostridiales; f__Clostridiaceae; g__Proteiniclasticum	0	0	0	0	0	2
d__Bacteria; k__norank_d__Bacteria; p__Firmicutes; c__Clostridia; o__norank_c__Clostridia; f__Hungateiclostridiaceae; g__Hungateiclostridium	0	2	0	0	0	0
d__Bacteria; k__norank_d__Bacteria; p__Proteobacteria; c__Gammaproteobacteria; o__Oceanospirillales; f__Pseudohongiellaceae; g__Pseudohongiella	0	0	0	0	2	0
d__Bacteria; k__norank_d__Bacteria; p__Patescibacteria; c__Berkelbacteria; o__norank_c__Berkelbacteria; f__norank_o__norank_c__Berkelbacteria; g__norank_f__norank_o__norank_c__Berkelbacteria	0	0	2	0	0	0
d__Bacteria; k__norank_d__Bacteria; p__Planctomycetota; c__Planctomycetes; o__Gemmatales; f__Gemmataceae; g__unclassified_f__Gemmataceae	0	0	0	0	0	2
d__Bacteria; k__norank_d__Bacteria; p__Bacteroidota; c__Bacteroidia; o__Bacteroidales; f__SB-5; g__norank_f__SB-5	2	0	0	0	0	0
d__Bacteria; k__norank_d__Bacteria; p__Planctomycetota; c__Planctomycetes; o__Pirellulales; f__Pirellulaceae; g__norank_f__Pirellulaceae	0	0	0	0	2	0
d__Bacteria; k__norank_d__Bacteria; p__Bdellovibrionota; c__Bdellovibrionia; o__Bacteriovoracales; f__Bacteriovoracaceae; g__norank_f__Bacteriovoracaceae	0	0	0	0	0	2
d__Bacteria; k__norank_d__Bacteria; p__Firmicutes; c__Desulfotomaculia; o__Ammonifexales; f__Desulforudaceae; g__Candidatus_Desulforudis	0	0	0	0	2	0
d__Bacteria; k__norank_d__Bacteria; p__Planctomycetota; c__Planctomycetes; o__Gemmatales; f__Gemmataceae; g__Gemmata	0	0	0	0	2	0
d__Bacteria; k__norank_d__Bacteria; p__Bacteroidota; c__Bacteroidia; o__Sphingobacteriales; f__env.OPS_17; g__norank_f__env.OPS_17	0	0	0	0	1	1
d__Bacteria; k__norank_d__Bacteria; p__Fusobacteriota; c__Fusobacteriia; o__Fusobacteriales; f__Leptotrichiaceae; g__norank_f__Leptotrichiaceae	0	0	0	0	0	2
d__Bacteria; k__norank_d__Bacteria; p__Planctomycetota; c__vadinHA49; o__norank_c__vadinHA49; f__norank_o__norank_c__vadinHA49; g__norank_f__norank_o__norank_c__vadinHA49	0	0	0	2	0	0
d__Bacteria; k__norank_d__Bacteria; p__Chloroflexi; c__Anaerolineae; o__Caldilineales; f__Caldilineaceae; g__unclassified_f__Caldilineaceae	0	0	0	0	0	2
d__Bacteria; k__norank_d__Bacteria; p__Firmicutes; c__Bacilli; o__Entomoplasmatales; f__norank_o__Entomoplasmatales; g__Candidatus_Spiroplasma	0	1	0	0	0	1
d__Bacteria; k__norank_d__Bacteria; p__Proteobacteria; c__Alphaproteobacteria; o__Rhizobiales; f__Rhizobiaceae; g__Hoeflea	0	0	0	0	0	2
d__Bacteria; k__norank_d__Bacteria; p__Desulfobacterota; c__Desulfuromonadia; o__unclassified_c__Desulfuromonadia; f__unclassified_c__Desulfuromonadia; g__unclassified_c__Desulfuromonadia	0	2	0	0	0	0
d__Bacteria; k__norank_d__Bacteria; p__Firmicutes; c__Clostridia; o__Lachnospirales; f__Lachnospiraceae; g__Lachnospiraceae_UCG-010	0	0	2	0	0	0
d__Bacteria; k__norank_d__Bacteria; p__Proteobacteria; c__Alphaproteobacteria; o__Azospirillales; f__Azospirillales_Incertae_Sedis; g__Stella	0	0	0	2	0	0
d__Bacteria; k__norank_d__Bacteria; p__Firmicutes; c__Clostridia; o__Peptostreptococcales-Tissierellales; f__norank_o__Peptostreptococcales-Tissierellales; g__Guggenheimella	0	0	0	0	2	0
d__Bacteria; k__norank_d__Bacteria; p__Deferrisomatota; c__Defferrisomatia; o__Defferrisomatales; f__Defferrisomataceae; g__Deferrisoma	0	0	0	2	0	0
d__Bacteria; k__norank_d__Bacteria; p__Firmicutes; c__Clostridia; o__Peptostreptococcales-Tissierellales; f__Anaerovoracaceae; g__Anaerovorax	2	0	0	0	0	0
d__Bacteria; k__norank_d__Bacteria; p__Proteobacteria; c__Alphaproteobacteria; o__Rickettsiales; f__Rickettsiaceae; g__unclassified_f__Rickettsiaceae	0	0	0	0	0	2
d__Bacteria; k__norank_d__Bacteria; p__Acidobacteriota; c__Blastocatellia; o__unclassified_c__Blastocatellia; f__unclassified_c__Blastocatellia; g__unclassified_c__Blastocatellia	0	0	0	0	0	2
d__Bacteria; k__norank_d__Bacteria; p__Proteobacteria; c__Gammaproteobacteria; o__Nitrosococcales; f__Nitrosococcaceae; g__3PJM14	0	2	0	0	0	0
d__Bacteria; k__norank_d__Bacteria; p__Bacteroidota; c__Bacteroidia; o__Bacteroidales; f__Bacteroidaceae; g__Bacteroides	0	0	0	0	0	2
d__Bacteria; k__norank_d__Bacteria; p__Spirochaetota; c__Leptospirae; o__Leptospirales; f__Leptospiraceae; g__norank_f__Leptospiraceae	0	0	0	2	0	0
d__Bacteria; k__norank_d__Bacteria; p__Firmicutes; c__Clostridia; o__Lachnospirales; f__Lachnospiraceae; g__Tyzzerella	0	0	0	0	0	2
d__Bacteria; k__norank_d__Bacteria; p__Firmicutes; c__Clostridia; o__Oscillospirales; f__Oscillospiraceae; g__norank_f__Oscillospiraceae	0	0	0	0	0	2
d__Bacteria; k__norank_d__Bacteria; p__Verrucomicrobiota; c__Verrucomicrobiae; o__Chthoniobacterales; f__Terrimicrobiaceae; g__Terrimicrobium	0	0	0	0	0	2
d__Bacteria; k__norank_d__Bacteria; p__Actinobacteriota; c__Actinobacteria; o__Micrococcales; f__Micrococcaceae; g__Citricoccus	2	0	0	0	0	0
d__Bacteria; k__norank_d__Bacteria; p__Proteobacteria; c__Gammaproteobacteria; o__Gammaproteobacteria_Incertae_Sedis; f__unclassified_o__Gammaproteobacteria_Incertae_Sedis; g__Candidatus_Ovatusbacter	2	0	0	0	0	0
d__Bacteria; k__norank_d__Bacteria; p__Methylomirabilota; c__Methylomirabilia; o__Methylomirabilales; f__Methylomirabilaceae; g__Sh765B-TzT-35	0	0	2	0	0	0
d__Bacteria; k__norank_d__Bacteria; p__Dependentiae; c__Babeliae; o__Babeliales; f__Babeliaceae; g__unclassified_f__Babeliaceae	0	1	0	0	0	1
d__Bacteria; k__norank_d__Bacteria; p__Planctomycetota; c__Pla4_lineage; o__norank_c__Pla4_lineage; f__norank_o__norank_c__Pla4_lineage; g__norank_f__norank_o__norank_c__Pla4_lineage	0	0	0	2	0	0
d__Bacteria; k__norank_d__Bacteria; p__Patescibacteria; c__Parcubacteria; o__Candidatus_Vogelbacteria; f__norank_o__Candidatus_Vogelbacteria; g__norank_f__norank_o__Candidatus_Vogelbacteria	0	0	0	0	0	2
d__Bacteria; k__norank_d__Bacteria; p__Bacteroidota; c__Bacteroidia; o__Bacteroidales; f__Rikenellaceae; g__Rikenellaceae_RC9_gut_group	0	0	0	2	0	0
d__Bacteria; k__norank_d__Bacteria; p__Actinobacteriota; c__Thermoleophilia; o__Solirubrobacterales; f__Solirubrobacteraceae; g__Conexibacter	2	0	0	0	0	0
d__Bacteria; k__norank_d__Bacteria; p__Firmicutes; c__Desulfotomaculia; o__Desulfotomaculales; f__Desulfallas-Sporotomaculum; g__norank_f__Desulfallas-Sporotomaculum	1	1	0	0	0	0
d__Bacteria; k__norank_d__Bacteria; p__Cyanobacteria; c__Cyanobacteriia; o__Oxyphotobacteria_Incertae_Sedis; f__unclassified_o__Oxyphotobacteria_Incertae_Sedis; g__EcFYyy-200	1	0	0	0	0	1
d__Bacteria; k__norank_d__Bacteria; p__Bacteroidota; c__Bacteroidia; o__Flavobacteriales; f__Crocinitomicaceae; g__Crocinitomix	0	0	2	0	0	0
d__Bacteria; k__norank_d__Bacteria; p__Cyanobacteria; c__Cyanobacteriia; o__Cyanobacteriales; f__unclassified_o__Cyanobacteriales; g__unclassified_o__Cyanobacteriales	0	0	0	0	0	2
d__Bacteria; k__norank_d__Bacteria; p__Firmicutes; c__Clostridia; o__Clostridiales; f__Clostridiaceae; g__Clostridium_sensu_stricto_9	0	0	0	0	0	2
d__Bacteria; k__norank_d__Bacteria; p__Firmicutes; c__Bacilli; o__Thermoactinomycetales; f__Thermoactinomycetaceae; g__Kroppenstedtia	0	0	0	0	0	2
d__Bacteria; k__norank_d__Bacteria; p__Firmicutes; c__Clostridia; o__Eubacteriales; f__Garciellaceae; g__Rhabdanaerobium	0	0	0	0	0	2
d__Bacteria; k__norank_d__Bacteria; p__Acidobacteriota; c__unclassified_p__Acidobacteriota; o__unclassified_p__Acidobacteriota; f__unclassified_p__Acidobacteriota; g__unclassified_p__Acidobacteriota	0	0	0	0	0	2
d__Bacteria; k__norank_d__Bacteria; p__Elusimicrobiota; c__Lineage_IIc; o__norank_c__Lineage_IIc; f__norank_o__norank_c__Lineage_IIc; g__norank_f__norank_o__norank_c__Lineage_IIc	0	0	0	0	0	2
d__Bacteria; k__norank_d__Bacteria; p__Proteobacteria; c__Alphaproteobacteria; o__Rickettsiales; f__Rickettsiaceae; g__Rickettsia	2	0	0	0	0	0
d__Bacteria; k__norank_d__Bacteria; p__Verrucomicrobiota; c__Verrucomicrobiae; o__Verrucomicrobiales; f__Rubritaleaceae; g__unclassified_f__Rubritaleaceae	0	0	0	0	0	2
d__Bacteria; k__norank_d__Bacteria; p__Firmicutes; c__Clostridia; o__Oscillospirales; f__Ruminococcaceae; g__unclassified_f__Ruminococcaceae	2	0	0	0	0	0
d__Bacteria; k__norank_d__Bacteria; p__Desulfobacterota; c__Syntrophobacteria; o__Syntrophobacterales; f__Syntrophobacteraceae; g__unclassified_f__Syntrophobacteraceae	0	0	0	2	0	0
d__Bacteria; k__norank_d__Bacteria; p__Firmicutes; c__Clostridia; o__Oscillospirales; f__Oscillospiraceae; g__Oscillospira	0	0	0	0	2	0
d__Bacteria; k__norank_d__Bacteria; p__Elusimicrobiota; c__Elusimicrobia; o__MVP-88; f__norank_o__MVP-88; g__norank_f__norank_o__MVP-88	0	0	0	2	0	0
d__Bacteria; k__norank_d__Bacteria; p__Acidobacteriota; c__Blastocatellia; o__Blastocatellales; f__Blastocatellaceae; g__unclassified_f__Blastocatellaceae	0	2	0	0	0	0
d__Bacteria; k__norank_d__Bacteria; p__Firmicutes; c__Bacilli; o__Thermoactinomycetales; f__Thermoactinomycetaceae; g__Thermoflavimicrobium	0	0	1	0	1	0
d__Bacteria; k__norank_d__Bacteria; p__Desulfobacterota; c__Desulfuromonadia; o__Bradymonadales; f__Bradymonadaceae; g__unclassified_f__Bradymonadaceae	0	2	0	0	0	0
d__Bacteria; k__norank_d__Bacteria; p__Verrucomicrobiota; c__Verrucomicrobiae; o__Pedosphaerales; f__Pedosphaeraceae; g__Ellin517	0	1	0	1	0	0
d__Bacteria; k__norank_d__Bacteria; p__Firmicutes; c__Clostridia; o__Oscillospirales; f__Oscillospiraceae; g__UCG-005	0	2	0	0	0	0
d__Bacteria; k__norank_d__Bacteria; p__Myxococcota; c__Myxococcia; o__Myxococcales; f__27F-1492R; g__norank_f__27F-1492R	0	2	0	0	0	0
d__Bacteria; k__norank_d__Bacteria; p__Proteobacteria; c__Gammaproteobacteria; o__Steroidobacterales; f__Steroidobacteraceae; g__unclassified_f__Steroidobacteraceae	0	0	0	0	0	2
d__Bacteria; k__norank_d__Bacteria; p__Planctomycetota; c__028H05-P-BN-P5; o__norank_c__028H05-P-BN-P5; f__norank_o__norank_c__028H05-P-BN-P5; g__norank_f__norank_o__norank_c__028H05-P-BN-P5	0	2	0	0	0	0
d__Bacteria; k__norank_d__Bacteria; p__Bacteroidota; c__Bacteroidia; o__Cytophagales; f__unclassified_o__Cytophagales; g__unclassified_o__Cytophagales	0	0	0	0	0	2
d__Bacteria; k__norank_d__Bacteria; p__Proteobacteria; c__Gammaproteobacteria; o__EC3; f__norank_o__EC3; g__norank_f__norank_o__EC3	0	0	0	0	0	2
d__Bacteria; k__norank_d__Bacteria; p__Fibrobacterota; c__Fibrobacteria; o__Fibrobacterales; f__Fibrobacteraceae; g__unclassified_f__Fibrobacteraceae	0	0	2	0	0	0
d__Bacteria; k__norank_d__Bacteria; p__Actinobacteriota; c__Actinobacteria; o__Micrococcales; f__Micrococcaceae; g__unclassified_f__Micrococcaceae	0	1	0	0	1	0
d__Bacteria; k__norank_d__Bacteria; p__Firmicutes; c__Clostridia; o__Oscillospirales; f__UCG-010; g__norank_f__UCG-010	0	0	0	2	0	0
d__Bacteria; k__norank_d__Bacteria; p__Firmicutes; c__Clostridia; o__norank_c__Clostridia; f__Hungateiclostridiaceae; g__Pseudoclostridium	0	0	0	0	0	2
d__Bacteria; k__norank_d__Bacteria; p__Proteobacteria; c__Alphaproteobacteria; o__Parvibaculales; f__Parvibaculaceae; g__Rhodoligotrophos	1	0	0	0	0	0
d__Bacteria; k__norank_d__Bacteria; p__Cyanobacteria; c__Cyanobacteriia; o__Cyanobacteriales; f__Nostocaceae; g__Tolypothrix	0	0	0	1	0	0
d__Bacteria; k__norank_d__Bacteria; p__Entotheonellaeota; c__Entotheonellia; o__Entotheonellales; f__Entotheonellaceae; g__unclassified_f__Entotheonellaceae	1	0	0	0	0	0
d__Bacteria; k__norank_d__Bacteria; p__Bacteroidota; c__Bacteroidia; o__Flavobacteriales; f__Crocinitomicaceae; g__Fluviicola	0	0	0	0	1	0
	31351	31351	31351	31351	31351	31351
